# Supplementary material for: Highly Selective Cyclization and Isomerization of Propargylamines to Access Functionalized Quinolines and 1-Azadienes
Source: MDPI journal article supplement (doi:10.3390/molecules28176259), 2023-08-26

## Supporting Information

# Highly Selective Cyclization and Isomerization of Propargylamines to Access Functionalized Quinolines and 1-Azadienes

Zheng-Guang Wu <sup>1,\*†</sup>, Hui Zhang <sup>1†</sup>, Chenhui Cao <sup>2</sup>, Chaowu Lu <sup>1</sup>, Aiwei Jiang <sup>1</sup>, Jie He <sup>1</sup>,  
Qin Zhao <sup>1</sup>  
and Yanfeng Tang <sup>1</sup>

<sup>1</sup> School of Chemistry and Chemical Engineering, Nantong University, Nantong 226019, China;  
zhanghui199907@163.com (H.Z.); lu17355389097@163.com (C.L.); jiangaiwei1996@163.com (A.J.);  
hejie19960901@163.com (J.H.); zhao.q@ntu.edu.cn (Q.Z.); tangyf@ntu.edu.cn (Y.T.)

<sup>2</sup> Anhui Sholon New Material Technology Co., Ltd., Chuzhou 239500, China; caoch@sholonchem.com

\* Correspondence: wuzhengguang\_zy@163.com

† These authors contributed equally to this work.

### 1. General information

Commercially available reagents were used as received without purification. Raw Materials were purchased from Bidepharm and Energy-chemical. Column chromatography was carried out on silica gel (200–300 mesh). Analytical thin-layer chromatography was performed on glass plates of Silica Gel GF-254 with detection by UV.  $^1\text{H}$ ,  $^{13}\text{C}$  and  $^{19}\text{F}$  NMR spectra were recorded on a Bruker AVANCE 400M spectrometer. The chemical shift references were as follows:  $^1\text{H}$  NMR ( $\text{CDCl}_3$ ) 7.26 ppm;  $^{13}\text{C}$  NMR ( $\text{CDCl}_3$ ) 77.0 ppm. HRMS spectra were carried out on Micromass GCT (ESI). The photoluminescence spectra were measured on a Hitachi F-4600 photoluminescence spectrophotometer. The absolute photoluminescence quantum yields ( $\Phi$ ) was measured with HORIBA FL-3 fluorescence spectrometer.

## **2. Experimental section**

**2.1 Synthesis of propargylamines** following reported procedures (*J. Org. Chem.* **2006**, *71*, 2064-2070; *Org. Lett.* **2006**, *8*, 2405-2408; *Tetrahedron*, **2014**, *70*, 3134-3140).

### **2.2 General procedure for the preparation of quinolines through Palladium-catalyzed cyclization.**

To a solution of propargylamine (0.1 mmol) and  $\text{Pd}(\text{OAc})_2$  (5 mol%) in toluene (2 mL), the reaction mixture was stirred at 80 °C under air for 12 h. After removing the solvent with vacuum distillation, the crude mixture was purified by flash column chromatography to afford the target product.

### **2.3 General procedure for the preparation of 1-azadienes via $\text{Bu}_4\text{NOAc}$ -promoted isomerization.**

To a solution of propargylamine (0.1 mmol) and  $\text{Bu}_4\text{NOAc}$  (0.2 mmol) in  $\text{CH}_3\text{CN}$  (2 mL), the reaction mixture was stirred at 80 °C under air for 12 h. After removing the solvent with vacuum distillation, the crude mixture was purified by flash column chromatography to afford the target product.

### **2.4 General procedure for the preparation of Ir-2m.**

The mixture of **2m** (1.0 mmol) and IrCl<sub>3</sub> (0.4 mmol) in 2-ethoxyethanol and water (20 mL, 3 : 1, v/v) was stirred at 130 °C for 24 h under argon. After cooling, the solid precipitate was filtered to obtain crude cyclometalated Ir(III) chloro-bridged dimer. Then, the slurry of crude chloro-bridged dimer, Na<sub>2</sub>CO<sub>3</sub> (5.0 mmol) and TMHD (5.0 mmol) in 2-ethoxyethanol (30 mL) was reacted at 120 °C for 24 h. The solvent was evaporated at low pressure, and the mixture was poured into water. Next, the mixture was extracted with CH<sub>2</sub>Cl<sub>2</sub> and then chromatographed to give the complex **Ir-2m** with 66% yield.

## 2.5 General procedure for the preparation of dihydropyridin-2(1H)-ones *via* cycloaddition reaction with 1-azadienes and homophthalic anhydride.

To a solution of propargylamine (1.0 mmol) and Bu<sub>4</sub>NOAc (2.0 mmol) in CH<sub>3</sub>CN (10 mL), the reaction mixture was stirred at 80 °C under air for 12 h. After cooling to room temperature, homophthalic anhydride (1.0 mmol) was added, and the mixture was stirred at room temperature under air for 12 h. After removing the solvent with vacuum distillation, the crude mixture was purified by flash column chromatography to afford the target product.

## 3. Supplementary data

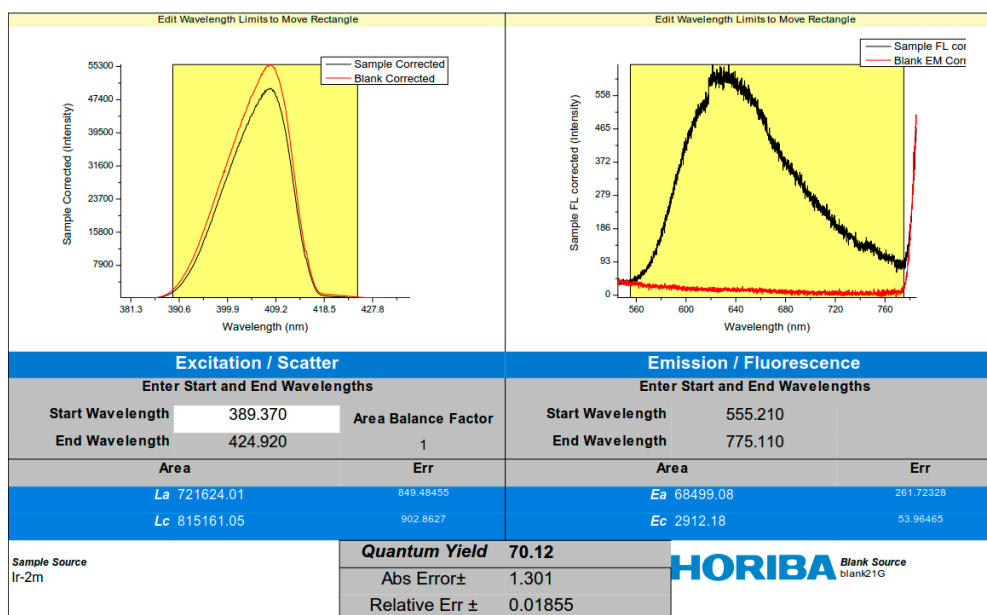

Figure S1 The photoluminescence quantum yield (PLQY) of **Ir-2m**.

## 4. Characterization data

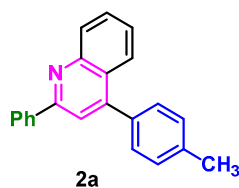

**phenyl-4-(p-tolyl)quinoline (2a):** White solid, 23.7 mg, 81% yield (Eluent: petroleum ether/ethyl acetate = 50/1).

**<sup>1</sup>H NMR (400 MHz, CDCl<sub>3</sub>)** δ 8.24 (d, *J* = 8.4 Hz, 1H), 8.22 – 8.15 (m, 2H), 7.97 – 7.84 (m, 1H), 7.81 (s, 1H), 7.73 (ddd, *J* = 8.4, 6.8, 1.5 Hz, 1H), 7.57 – 7.39 (m, 6H), 7.36 (d, *J* = 7.8 Hz, 2H), 2.48 (s, 3H).

**<sup>13</sup>C NMR (101 MHz, CDCl<sub>3</sub>)** δ 156.9, 149.3, 148.8, 139.7, 138.4, 135.5, 130.1, 129.5, 129.5, 129.3, 128.9, 128.2, 127.6, 126.3, 125.9, 125.7, 119.4, 21.3.

**HRMS (ESI)** *m/z* calcd for C<sub>22</sub>H<sub>17</sub>N [M+H]: 296.1439, found: 296.1439.

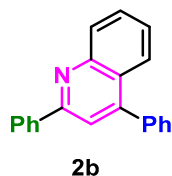

**2,4-diphenylquinoline (2b):** Light yellow solid, 19.7 mg, 72% yield (Eluent: petroleum ether/ethyl acetate = 50/1).

**<sup>1</sup>H NMR (400 MHz, CDCl<sub>3</sub>)** δ 8.25 (dd, *J* = 8.6, 1.3 Hz, 1H), 8.22 – 8.16 (m, 2H), 7.91 (dd, *J* = 8.5, 1.4 Hz, 1H), 7.82 (s, 1H), 7.74 (ddd, *J* = 8.4, 6.8, 1.5 Hz, 1H), 7.61 – 7.51 (m, 7H), 7.52 – 7.46 (m, 1H), 7.49 – 7.42 (m, 1H).

**<sup>13</sup>C NMR (101 MHz, CDCl<sub>3</sub>)** δ 156.9, 149.2, 148.8, 139.7, 138.4, 130.1, 129.6, 129.5, 129.3, 128.8, 128.6, 128.4, 127.6, 126.3, 125.8, 125.6, 123.5, 119.4, 115.9.

**HRMS (ESI)** *m/z* calcd for C<sub>21</sub>H<sub>15</sub>N [M+H]: 282.1283, found: 282.1283.

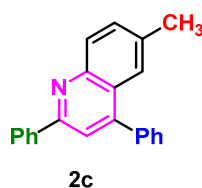

**methyl-2,4-diphenylquinoline (2c):** Faint yellow solid, 23.4 mg, 78% yield (Eluent: petroleum ether/ethyl acetate = 50/1).

**<sup>1</sup>H NMR (400 MHz, CDCl<sub>3</sub>)** δ 8.21 – 8.10 (m, 3H), 7.78 (s, 1H), 7.65 (s, 1H), 7.56 (d, *J* = 4.4 Hz, 5H), 7.52 (dd, *J* = 8.2, 6.3 Hz, 3H), 7.49 – 7.40 (m, 1H), 2.48 (s, 3H).

**<sup>13</sup>C NMR (101 MHz, CDCl<sub>3</sub>)** δ 156.0, 148.5, 147.4, 139.8, 138.6, 136.3, 131.8, 129.8, 129.6, 129.2, 128.8, 128.6, 128.3, 127.5, 125.7, 124.4, 119.4, 21.8.

**HRMS (ESI)** *m/z* calcd for C<sub>22</sub>H<sub>17</sub>N [M+H]: 296.1439, found: 296.1439.

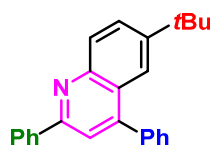

**2d**

**6-(tert-butyl)-2,4-diphenylquinoline (2d):** Light yellow solid, 23.6 mg, 70% yield (Eluent: petroleum ether/ethyl acetate = 40/1).

**<sup>1</sup>H NMR (400 MHz, CDCl<sub>3</sub>)** δ 8.23 – 8.13 (m, 3H), 7.90 – 7.76 (m, 3H), 7.63 – 7.39 (m, 8H), 1.35 (s, 9H).

**<sup>13</sup>C NMR (101 MHz, CDCl<sub>3</sub>)** δ 156.3, 149.2, 149.0, 138.6, 129.6, 129.6, 129.2, 128.8, 128.6, 128.4, 128.4, 127.5, 125.3, 120.5, 119.5, 35.1, 31.2.

**HRMS (ESI)** *m/z* calcd for C<sub>25</sub>H<sub>23</sub>N [M+H]: 338.1909, found: 338.1910.

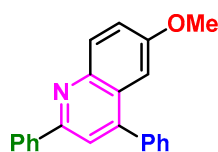

**2e**

**6-methoxy-2,4-diphenylquinoline (2e):** Light yellow solid, 24.8 mg, 79% yield (Eluent: petroleum ether/ethyl acetate = 40/1).

**<sup>1</sup>H NMR (400 MHz, CDCl<sub>3</sub>)** δ 8.19 – 8.11 (m, 3H), 7.77 (s, 1H), 7.58 (s, 1H), 7.59 – 7.52 (m, 2H), 7.55 – 7.43 (m, 4H), 7.47 – 7.33 (m, 2H), 7.19 (d, *J* = 2.8 Hz, 1H), 3.80 (s, 3H).

**<sup>13</sup>C NMR (101 MHz, CDCl<sub>3</sub>)** δ 157.8, 154.7, 147.8, 144.9, 139.8, 138.7, 131.6, 129.4, 129.0, 128.8, 128.7, 128.4, 127.3, 126.7, 121.8, 119.7, 103.7, 55.5.

**HRMS (ESI)** *m/z* calcd for C<sub>22</sub>H<sub>17</sub>NO [M+H]: 312.1388, found: 312.1388.

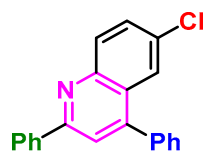

**2f**

**6-chloro-2,4-diphenylquinoline (2f):** White solid, 22.3 mg, 73% yield (Eluent: petroleum ether/ethyl acetate = 50/1).

**<sup>1</sup>H NMR (400 MHz, CDCl<sub>3</sub>)** δ 8.22 – 8.14 (m, 3H), 7.89 – 7.82 (m, 2H), 7.67 (dd, *J* = 9.0, 2.3 Hz, 1H), 7.62 – 7.48 (m, 7H), 7.52 – 7.40 (m, 1H).

**<sup>13</sup>C NMR (101 MHz, CDCl<sub>3</sub>)** δ 157.1, 148.5, 147.2, 139.2, 137.8, 132.2, 131.7, 130.5, 129.6, 129.4, 128.9, 128.8, 128.7, 127.5, 126.5, 124.5, 120.1.

**HRMS (ESI)** *m/z* calcd for C<sub>21</sub>H<sub>14</sub>ClN [M+H]: 316.0893, found: 316.0893.

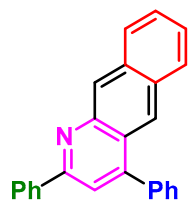

**2g**

**2,4-diphenylbenzo[g]quinoline (2g):** Light yellow solid, 23.2 mg, 71% yield (Eluent: petroleum ether/ethyl acetate = 40/1).

**<sup>1</sup>H NMR (400 MHz, CDCl<sub>3</sub>)** δ 8.27 – 8.19 (m, 2H), 8.13 (d, *J* = 9.0 Hz, 1H), 8.00 (d, *J* = 9.0 Hz, 1H), 7.88 (dd, *J* = 7.9, 1.5 Hz, 1H), 7.81 (s, 1H), 7.67 (d, *J* = 8.6 Hz, 1H), 7.60 – 7.42 (m, 9H), 7.16 (ddd, *J* = 8.6, 7.0, 1.5 Hz, 1H).

**<sup>13</sup>C NMR (101 MHz, CDCl<sub>3</sub>)** δ 155.5, 149.8, 149.2, 143.0, 139.1, 132.9, 131.5, 129.8, 129.3, 129.3, 129.2, 128.9, 128.6, 128.4, 128.1, 128.1, 127.4, 126.5, 125.5, 122.8, 121.8.

**HRMS (ESI)** *m/z* calcd for C<sub>25</sub>H<sub>17</sub>N [M+H]: 332.1439, found: 332.1439.

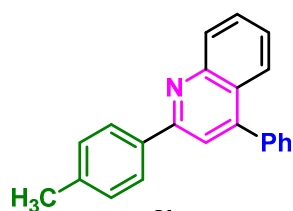

**2h**

**4-phenyl-2-(p-tolyl)quinoline (2h):** Faint yellow solid, 20.9 mg, 73% yield (Eluent: petroleum ether/ethyl acetate = 50/1).

**<sup>1</sup>H NMR (400 MHz, CDCl<sub>3</sub>)** δ 8.23 (dd, *J* = 8.6, 1.2 Hz, 1H), 8.13 – 8.06 (m, 2H), 7.89 (dd, *J* = 8.4, 1.4 Hz, 1H), 7.82 – 7.68 (m, 2H), 7.60 – 7.40 (m, 6H), 7.33 (d, *J* = 8.1 Hz, 2H), 2.43 (s, 3H).

**<sup>13</sup>C NMR (101 MHz, CDCl<sub>3</sub>)** δ 156.9, 149.1, 148.8, 139.5, 138.5, 136.9, 130.1, 129.6, 129.5, 128.6, 128.4, 128.1, 127.5, 126.2, 125.7, 125.6, 119.2, 21.4.

**HRMS (ESI)** *m/z* calcd for C<sub>22</sub>H<sub>17</sub>N [M+H]: 296.1439, found: 296.1438.

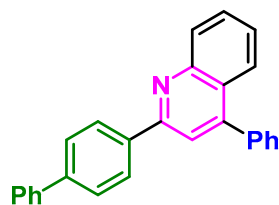

**2i**

**2-([1,1'-biphenyl]-4-yl)-4-phenylquinoline (2i):** Light yellow solid, 28.7 mg, 81% yield (Eluent: petroleum ether/ethyl acetate = 40/1).

**<sup>1</sup>H NMR (400 MHz, CDCl<sub>3</sub>)** δ 8.32 – 8.23 (m, 3H), 7.99 – 7.85 (m, 2H), 7.83 – 7.65 (m, 5H), 7.58 (s, 2H), 7.57 – 7.51 (m, 2H), 7.53 – 7.44 (m, 3H), 7.50 – 7.31 (m, 2H).

**<sup>13</sup>C NMR (101 MHz, CDCl<sub>3</sub>)** δ 156.5, 149.2, 148.9, 142.1, 140.6, 138.5, 138.4, 130.1, 129.6, 128.8, 128.6, 128.5, 128.0, 127.6, 127.6, 127.2, 126.4, 125.8, 125.7, 119.3.

**HRMS (ESI)**  $m/z$  calcd for  $C_{27}H_{19}N$   $[M+H]^+$ : 358.1596, found: 358.1596.

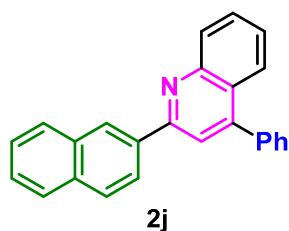

**(naphthalen-2-yl)-4-phenylquinoline (2j):** Light yellow solid, 23.6 mg, 74% yield (Eluent: petroleum ether/ethyl acetate = 40/1).

**$^1H$  NMR (400 MHz,  $CDCl_3$ )**  $\delta$  8.65 (d,  $J$  = 1.7 Hz, 1H), 8.41 (dd,  $J$  = 8.6, 1.8 Hz, 1H), 8.30 (dd,  $J$  = 8.6, 1.2 Hz, 1H), 8.04 – 7.84 (m, 5H), 7.76 (ddd,  $J$  = 8.4, 6.8, 1.5 Hz, 1H), 7.67 – 7.45 (m, 8H).

**$^{13}C$  NMR (101 MHz,  $CDCl_3$ )**  $\delta$  156.7, 149.3, 148.9, 138.5, 136.9, 133.9, 133.5, 130.1, 129.6, 129.5, 128.8, 128.6, 128.6, 128.5, 127.7, 127.2, 126.7, 126.4, 126.3, 125.8, 125.7, 125.1, 124.5, 119.5.

**HRMS (ESI)**  $m/z$  calcd for  $C_{25}H_{17}N$   $[M+H]^+$ : 332.1439, found: 332.1439.

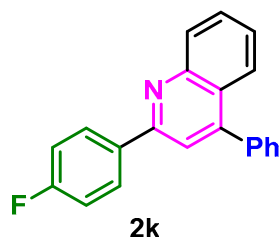

**(4-fluorophenyl)-4-phenylquinoline (2k):** Faint yellow solid, 23.7 mg, 78% yield (Eluent: petroleum ether/ethyl acetate = 40/1).

**$^1H$  NMR (400 MHz,  $CDCl_3$ )**  $\delta$  8.25 – 8.15 (m, 3H), 7.91 (dd,  $J$  = 8.4, 1.4 Hz, 1H), 7.80 – 7.70 (m, 2H), 7.56 (s, 3H), 7.60 – 7.50 (m, 2H), 7.48 (ddd,  $J$  = 8.3, 6.8, 1.3 Hz, 1H), 7.26 – 7.16 (m, 2H).

**$^{13}C$  NMR (101 MHz,  $CDCl_3$ )**  $\delta$  155.8, 149.4, 148.8, 138.3, 135.8, 130.0, 129.7, 129.6, 129.5, 129.4, 128.7, 128.5, 126.4, 125.7, 119.0, 115.9, 115.7.

**$^{19}F$  NMR (376 MHz,  $CDCl_3$ )**  $\delta$  -112.45.

**HRMS (ESI)**  $m/z$  calcd for  $C_{21}H_{14}FN$   $[M+H]^+$ : 300.1189, found: 300.1190.

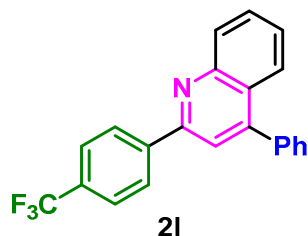

**3-phenyl-2-(4-(trifluoromethyl)phenyl)quinoline (2l):** Light yellow solid, 24.6 mg, 72% yield (Eluent: petroleum ether/ethyl acetate = 50/1).

**$^1H$  NMR (400 MHz,  $CDCl_3$ )**  $\delta$  8.36 – 8.30 (m, 2H), 8.27 (d,  $J$  = 8.4 Hz, 1H), 7.94 (dd,  $J$  = 8.5, 1.4 Hz, 1H), 7.84 (s, 1H), 7.78 (dd,  $J$  = 8.5, 6.8 Hz, 3H), 7.60 – 7.45 (m,

6H).

**<sup>13</sup>C NMR (101 MHz, CDCl<sub>3</sub>)** δ 138.1, 130.2, 129.9, 129.6, 128.7, 128.6, 127.9, 127.0, 126.1, 125.8, 125.8, 119.2, 29.7.

**<sup>19</sup>F NMR (376 MHz, CDCl<sub>3</sub>)** δ -62.56.

**HRMS (ESI)** *m/z* calcd for C<sub>22</sub>H<sub>14</sub>F<sub>3</sub>N [M+H]: 350.1157, found: 350.1156.

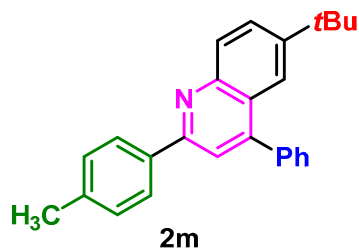

**6-(tert-butyl)-4-phenyl-2-(p-tolyl)quinoline (2m):** Light yellow solid, 28.3 mg, 82% yield (Eluent: petroleum ether/ethyl acetate = 50/1).

**<sup>1</sup>H NMR (400 MHz, CDCl<sub>3</sub>)** δ 8.16 (d, *J* = 8.8 Hz, 1H), 8.11 – 8.04 (m, 2H), 7.88 – 7.79 (m, 2H), 7.77 (s, 1H), 7.62 – 7.55 (m, 3H), 7.58 – 7.46 (m, 2H), 7.32 (d, *J* = 8.0 Hz, 2H), 2.43 (s, 3H), 1.35 (s, 9H).

**<sup>13</sup>C NMR (101 MHz, CDCl<sub>3</sub>)** δ 156.3, 149.0, 148.8, 147.4, 139.2, 138.7, 137.1, 129.6, 129.6, 128.6, 128.3, 127.4, 125.2, 120.5, 119.3, 35.1, 31.2, 21.4.

**HRMS (ESI)** *m/z* calcd for C<sub>26</sub>H<sub>25</sub>N [M+H]: 352.2065, found: 352.2065.

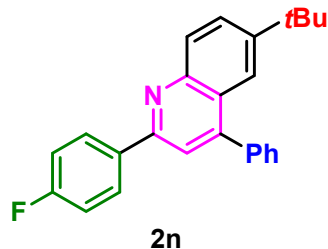

**6-(tert-butyl)-2-(4-fluorophenyl)-4-phenylquinoline (2n):** Light yellow solid, 24.9 mg, 71% yield (Eluent: petroleum ether/ethyl acetate = 50/1).

**<sup>1</sup>H NMR (400 MHz, CDCl<sub>3</sub>)** δ 8.21 – 8.12 (m, 3H), 7.88 – 7.80 (m, 2H), 7.73 (s, 1H), 7.62 – 7.52 (m, 4H), 7.52 (ddd, *J* = 6.6, 5.3, 2.6 Hz, 1H), 7.25 – 7.14 (m, 2H), 1.35 (s, 9H).

**<sup>13</sup>C NMR (101 MHz, CDCl<sub>3</sub>)** δ 165.0, 162.5, 155.3, 149.3, 149.2, 147.3, 138.6, 136.0, 136.0, 129.5, 129.4, 129.3, 128.6, 128.6, 128.4, 125.2, 120.6, 119.1, 115.9, 115.6, 35.1, 31.2.

**<sup>19</sup>F NMR (376 MHz, CDCl<sub>3</sub>)** δ -112.78.

**HRMS (ESI)** *m/z* calcd for C<sub>25</sub>H<sub>22</sub>FN [M+H]: 356.1815, found: 356.1815.



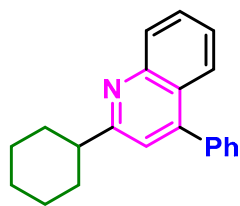

**2o**

**2-cyclohexyl-4-phenylquinoline (2o):** White solid, 20.2mg, 81% yield (Eluent: petroleum ether/ethyl acetate = 50/1).

**<sup>1</sup>H NMR (400 MHz, CDCl<sub>3</sub>)** δ 8.10 – 8.01 (m, 1H), 7.79 (dd, *J* = 8.4, 1.4 Hz, 1H), 7.50 – 7.38 (m, 6H), 7.19 (d, *J* = 4.8 Hz, 2H), 2.04 – 1.95 (m, 3H), 1.85 – 1.80 (m, 3H), 1.58 (dd, *J* = 12.4, 3.4 Hz, 2H), 1.42 – 1.37 (m, 2H), 1.18 (s, 1H).

**<sup>13</sup>C NMR (101 MHz, CDCl<sub>3</sub>)** δ 166.4, 148.7, 148.2, 138.5, 129.6, 129.3, 129.2, 128.5, 128.3, 125.7, 125.6, 125.6, 119.9, 47.7, 32.9, 29.7, 26.6, 26.1.

**HRMS (ESI)** *m/z* calcd for C<sub>21</sub>H<sub>21</sub>N [M+H]: 288.1752, found: 288.1752.

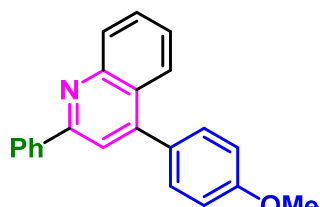

**2p**

**4-(4-methoxyphenyl)-2-phenylquinoline (2p):** Light yellow solid, 23.3 mg, 75% yield (Eluent: petroleum ether/ethyl acetate = 50/1).

**<sup>1</sup>H NMR (400 MHz, CDCl<sub>3</sub>)** δ 8.24 (d, *J* = 8.5 Hz, 1H), 8.22 – 8.15 (m, 2H), 7.96 (dd, *J* = 8.4, 1.4 Hz, 1H), 7.80 (s, 1H), 7.73 (ddd, *J* = 8.4, 6.8, 1.5 Hz, 1H), 7.58 – 7.46 (m, 6H), 7.13 – 7.05 (m, 2H), 3.92 (s, 3H).

**<sup>13</sup>C NMR (101 MHz, CDCl<sub>3</sub>)** δ 159.9, 156.9, 148.9, 139.7, 130.8, 130.7, 130.1, 129.5, 129.3, 128.8, 127.6, 126.2, 126.0, 125.7, 119.3, 114.1, 55.4.

**HRMS (ESI)** *m/z* calcd for C<sub>22</sub>H<sub>17</sub>NO [M+H]: 312.1388, found: 312.1388.

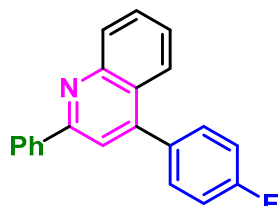

**2q**

**4-(4-fluorophenyl)-2-phenylquinoline (2q):** Light yellow solid, 20.9 mg, 71% yield (Eluent: petroleum ether/ethyl acetate = 40/1).

**<sup>1</sup>H NMR (400 MHz, CDCl<sub>3</sub>)** δ 8.26 (dd, *J* = 8.5, 1.2 Hz, 1H), 8.25 – 8.15 (m, 2H), 7.88 (dd, *J* = 8.3, 1.4 Hz, 1H), 7.81 (s, 1H), 7.75 (ddd, *J* = 8.4, 6.8, 1.4 Hz, 1H), 7.58 – 7.41 (m, 5H), 7.35 (dt, *J* = 7.6, 1.3 Hz, 1H), 7.29 (dt, *J* = 9.4, 2.1 Hz, 1H), 7.26 – 7.12 (m, 1H).

**<sup>13</sup>C NMR (101 MHz, CDCl<sub>3</sub>)** δ 164.0, 161.6, 156.9, 148.8, 147.8, 147.8, 140.6, 140.5, 139.5, 130.3, 130.2, 129.8, 129.5, 128.9, 127.6, 126.6, 125.4, 125.4, 125.4, 125.3, 119.3, 116.8, 116.6, 115.5, 115.3.

**<sup>19</sup>F NMR (376 MHz, CDCl<sub>3</sub>)** δ -112.48.

**HRMS (ESI)** *m/z* calcd for C<sub>21</sub>H<sub>14</sub>FN [M+H]: 300.1189, found: 300.1189.

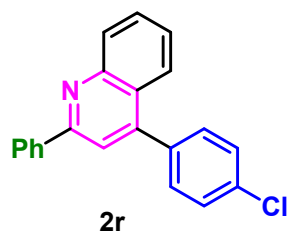

**4-(4-chlorophenyl)-2-phenylquinoline (2r):** Light yellow solid, 22.2 mg, 71% yield (Eluent: petroleum ether/ethyl acetate = 50/1).

**<sup>1</sup>H NMR (400 MHz, CDCl<sub>3</sub>)** δ 8.25 (d, *J* = 8.4 Hz, 1H), 8.22 – 8.15 (m, 2H), 7.85 (dd, *J* = 8.4, 1.4 Hz, 1H), 7.81 – 7.65 (m, 2H), 7.58 – 7.43 (m, 8H).

**<sup>13</sup>C NMR (101 MHz, CDCl<sub>3</sub>)** δ 156.9, 148.8, 147.9, 139.5, 136.8, 134.7, 130.9, 130.3, 129.7, 129.5, 128.9, 127.6, 126.6, 125.5, 125.3, 119.3.

**HRMS (ESI)** *m/z* calcd for C<sub>21</sub>H<sub>14</sub>ClN [M+H]: 316.0893, found: 316.0893.

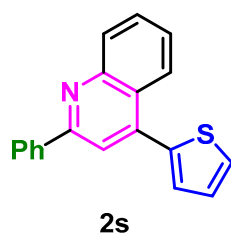

**2-phenyl-4-(thiophen-2-yl)quinoline (2s):** Light yellow solid, 20.3 mg, 72% yield (Eluent: petroleum ether/ethyl acetate = 40/1).

**<sup>1</sup>H NMR (400 MHz, CDCl<sub>3</sub>)** δ 8.26 (ddd, *J* = 14.2, 8.5, 1.4 Hz, 2H), 8.21 – 8.14 (m, 2H), 7.92 (s, 1H), 7.75 (ddd, *J* = 8.3, 6.8, 1.4 Hz, 1H), 7.59 – 7.40 (m, 6H), 7.25 (t, *J* = 4.3 Hz, 1H).

**<sup>13</sup>C NMR (101 MHz, CDCl<sub>3</sub>)** δ 156.9, 149.0, 141.5, 139.4, 139.2, 130.2, 129.7, 129.4, 128.9, 128.5, 127.8, 127.6, 127.2, 126.7, 125.4, 125.3, 119.8.

**HRMS (ESI)** *m/z* calcd for C<sub>19</sub>H<sub>13</sub>NS [M+H]: 288.0847, found: 288.0847.

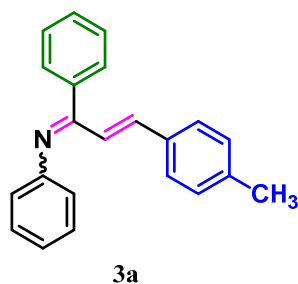

**(2E)-N,1-diphenyl-3-(p-tolyl)prop-2-en-1-imine (3a):** Light yellow solid, 26.8 mg, 91% yield (Eluent: petroleum ether/ethyl acetate = 40/1).

**<sup>1</sup>H NMR (400 MHz, CDCl<sub>3</sub>)** δ 7.78 – 7.69 (m, 2H), 7.47 (dd, *J* = 4.1, 1.8 Hz, 2H), 7.38 – 7.34 (m, 2H), 7.22 – 7.08 (m, 6H), 6.93 – 6.85 (m, 2H), 2.34 (d, *J* = 11.3 Hz, 3H).

**<sup>13</sup>C NMR (101 MHz, CDCl<sub>3</sub>)** δ 167.3 (C=N), 151.0, 141.7, 132.9, 129.8, 129.5, 129.5, 129.4, 128.8, 128.3, 127.5, 127.5, 123.8, 120.8, 21.4.

**HRMS (ESI)** *m/z* calcd for C<sub>22</sub>H<sub>19</sub>N [M+H]: 298.1596, found: 298.1594.

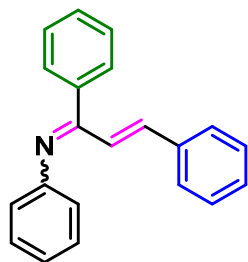

3b

**(2E)-N,1,3-triphenylprop-2-en-1-imine(3b):** Light yellow solid, 25.3 mg, 88% yield (Eluent: petroleum ether/ethyl acetate = 40/1).

**<sup>1</sup>H NMR (400 MHz, CDCl<sub>3</sub>)** δ 7.75 (t, *J* = 2.0 Hz, 1H), 7.49 (q, *J* = 1.4 Hz, 3H), 7.37 (s, 1H), 7.30 (d, *J* = 9.6 Hz, 7H), 7.13 – 7.11 (m, 1H), 6.97 (d, *J* = 1.3 Hz, 1H), 6.92 (s, 1H).

**<sup>13</sup>C NMR (101 MHz, CDCl<sub>3</sub>)** δ 167.2 (C=N), 150.9, 141.7, 139.4, 135.7, 131.6, 129.4, 129.4, 128.9, 128.8, 128.4, 127.5, 124.0, 121.9, 120.8.

**HRMS (ESI)** *m/z* calcd for C<sub>21</sub>H<sub>17</sub>N [M+H]: 284.1439, found: 284.1441.

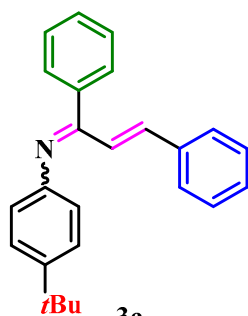

3c

**(2E)-N-(4-(tert-butyl)phenyl)-1,3-diphenylprop-2-en-1-imine (3c):** Light yellow solid, 28.3 mg, 85% yield (Eluent: petroleum ether/ethyl acetate = 30/1).

**<sup>1</sup>H NMR (400 MHz, CDCl<sub>3</sub>)** δ 7.74 (t, *J* = 2.0 Hz, 1H), 7.48 (t, *J* = 1.7 Hz, 2H), 7.39 – 7.30 (m, 8H), 6.98 – 6.92 (m, 3H), 1.36 (s, 9H).

**<sup>13</sup>C NMR (101 MHz, CDCl<sub>3</sub>)** δ 166.9 (C=N), 148.1, 146.9, 141.3, 139.7, 135.9, 132.0, 129.8, 129.4, 128.8, 128.3, 127.5, 125.7, 122.3, 120.8, 34.4, 31.5.

**HRMS (ESI)** *m/z* calcd for C<sub>25</sub>H<sub>25</sub>N [M+H]: 340.2065, found: 340.2063.

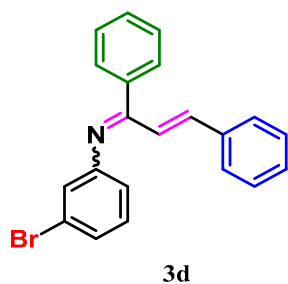

**(2E)-N-(3-bromophenyl)-1,3-diphenylprop-2-en-1-imine (3d):** Light yellow solid, 32.7 mg, 92% yield (Eluent: petroleum ether/ethyl acetate = 40/1).

**<sup>1</sup>H NMR (400 MHz, CDCl<sub>3</sub>)** δ 7.71 (d, *J* = 2.0 Hz, 2H), 7.50 (s, 3H), 7.34 – 7.29 (m, 2H), 7.14 (t, *J* = 2.1 Hz, 2H), 6.94 (s, 2H), 6.86 (d, *J* = 2.6 Hz, 3H).

**<sup>13</sup>C NMR (101 MHz, CDCl<sub>3</sub>)** δ 168.0 (C=N), 152.4, 142.7, 138.9, 135.4, 131.1, 130.3, 129.3, 128.9, 128.4, 127.6, 126.8, 124.1, 123.6, 122.7, 121.3, 119.3.

**HRMS (ESI)** *m/z* calcd for C<sub>21</sub>H<sub>16</sub>BrN [M+H]: 362.0544, found: 362.0546.

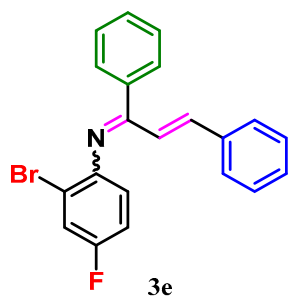

**(2E)-N-(2-bromo-4-fluorophenyl)-1,3-diphenylprop-2-en-1-imine (3e):** Light yellow solid, 34.2 mg, 91% yield (Eluent: petroleum ether/ethyl acetate = 40/1).

**<sup>1</sup>H NMR (400 MHz, CDCl<sub>3</sub>)** δ 7.80 (t, *J* = 1.6 Hz, 2H), 7.50 (d, *J* = 7.0 Hz, 5H), 7.32 (d, *J* = 11.7 Hz, 1H), 7.24 (d, *J* = 11.8 Hz, 2H), 6.95 (s, 1H), 6.87 – 6.84 (m, 1H), 6.73 (s, 1H).

**<sup>13</sup>C NMR (101 MHz, CDCl<sub>3</sub>)** δ 169.3 (C=N), 157.6, 142.9, 138.5, 135.4, 130.7, 130.2, 129.8, 129.3, 128.9, 128.4, 128.2, 127.7, 121.5, 121.1, 119.9, 115.1, 114.9.

**<sup>19</sup>F NMR (376 MHz, CDCl<sub>3</sub>)** δ -118.89.

**HRMS (ESI)** *m/z* calcd for C<sub>21</sub>H<sub>15</sub>BrFN [M+H]: 380.0450, found: 380.0453.

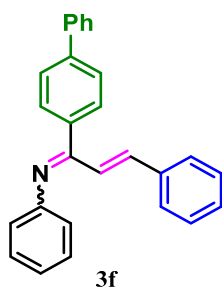

**(2E)-1-([1,1'-biphenyl]-4-yl)-N,3-diphenylprop-2-en-1-imine (3f):** Light yellow solid, 32.1mg, 87% yield (Eluent: petroleum ether/ethyl acetate = 40/1).

**<sup>1</sup>H NMR (400 MHz, CDCl<sub>3</sub>)** δ 7.90 – 7.80 (m, 1H), 7.77 – 7.57 (m, 4H), 7.59 – 7.48 (m, 1H), 7.50 – 7.38 (m, 3H), 7.42 – 7.32 (m, 3H), 7.35 – 7.28 (m, 3H), 7.21 – 7.12 (m, 1H), 7.06 – 6.88 (m, 3H).

**<sup>13</sup>C NMR (101 MHz, CDCl<sub>3</sub>)** δ 166.8 (C=N), 150.9, 144.8, 142.8, 141.6, 140.5, 139.9, 135.7, 129.9, 129.4, 128.9, 128.8, 128.2, 127.5, 127.2, 127.1, 124.0, 122.0, 120.9.

**HRMS (ESI)** *m/z* calcd for C<sub>27</sub>H<sub>21</sub>N [M+H]: 360.1752, found: 360.1754.

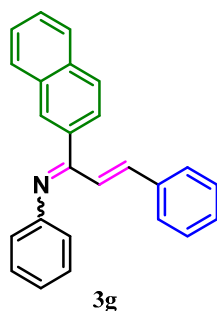

**(2E)-1-(naphthalen-2-yl)-N,3-diphenylprop-2-en-1-imine (3g):** Light yellow solid, 28.2 mg, 84% yield (Eluent: petroleum ether/ethyl acetate = 30/1).

**<sup>1</sup>H NMR (400 MHz, CDCl<sub>3</sub>)** δ 8.24 (d, *J* = 1.7 Hz, 1H), 7.96 – 7.91 (m, 3H), 7.71 – 7.68 (m, 1H), 7.40 – 7.24 (m, 9H), 6.99 (d, *J* = 7.6 Hz, 3H).

**<sup>13</sup>C NMR (101 MHz, CDCl<sub>3</sub>)** δ 167.1 (C=N), 151.0, 144.8, 141.7, 136.8, 135.7, 134.1, 129.4, 128.9, 128.8, 128.8, 127.7, 127.5, 126.4, 124.0, 122.2, 120.8.

**HRMS (ESI)** *m/z* calcd for C<sub>25</sub>H<sub>19</sub>N [M+H]: 334.1596, found: 334.1593.

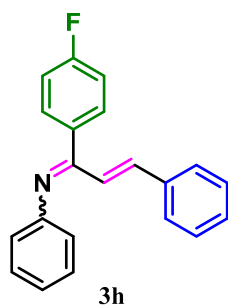

**(2E)-1-(4-fluorophenyl)-N,3-diphenylprop-2-en-1-imine (3h):** Light yellow solid, 27.4 mg, 93% yield (Eluent: petroleum ether/ethyl acetate = 40/1).

**<sup>1</sup>H NMR (400 MHz, CDCl<sub>3</sub>)** δ 7.76 (d, *J* = 3.4 Hz, 1H), 7.37 – 7.24 (m, 6H), 7.16 (d, *J* = 1.7 Hz, 3H), 6.94 (t, *J* = 1.1 Hz, 2H), 6.89 (s, 2H).

**<sup>13</sup>C NMR (101 MHz, CDCl<sub>3</sub>)** δ 166.0 (C=N), 150.8, 141.6, 135.5, 131.4, 131.3, 129.5, 128.9, 128.9, 127.5, 124.1, 121.9, 120.8, 115.5, 115.3.

**<sup>19</sup>F NMR (376 MHz, CDCl<sub>3</sub>)** δ -110.92.

**HRMS (ESI)** *m/z* calcd for C<sub>21</sub>H<sub>16</sub>FN [M+H]: 302.1345, found: 302.1347.

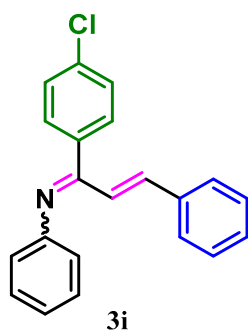

**(2E)-1-(4-chlorophenyl)-N,3-diphenylprop-2-en-1-imine (3i):** Light yellow solid, 28.5 mg, 90% yield (Eluent: petroleum ether/ethyl acetate = 40/1).

**<sup>1</sup>H NMR (400 MHz, CDCl<sub>3</sub>)** δ 7.65 – 7.59 (m, 2H), 7.46 – 7.23 (m, 6H), 7.21 – 7.15 (m, 1H), 7.07 (dt, *J* = 6.0, 2.6 Hz, 1H), 6.91 – 6.79 (m, 4H).

**<sup>13</sup>C NMR (101 MHz, CDCl<sub>3</sub>)** δ 165.0 (C=N), 149.6, 140.6, 136.8, 135.0, 134.4, 129.7, 129.4, 128.6, 127.9, 127.8, 127.6, 126.5, 123.1, 119.7.

**HRMS (ESI)** *m/z* calcd for C<sub>21</sub>H<sub>16</sub>ClN [M+H]: 318.1050, found: 318.1046.

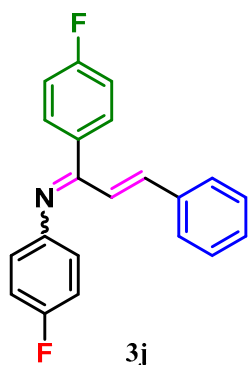

**(2E)-N,1-bis(4-fluorophenyl)-3-phenylprop-2-en-1-imine (3j):** Light yellow solid, 25.5 mg, 81% yield (Eluent: petroleum ether/ethyl acetate = 30/1).

**<sup>1</sup>H NMR (400 MHz, CDCl<sub>3</sub>)** δ 8.11 – 8.02 (m, 1H), 7.76 – 7.73 (m, 1H), 7.42 (d, *J* = 3.0 Hz, 1H), 7.33 (s, 4H), 7.22 – 7.15 (m, 2H), 7.10 – 6.99 (m, 2H), 6.90 (t, *J* = 6.1 Hz, 2H).

**<sup>13</sup>C NMR (101 MHz, CDCl<sub>3</sub>)** δ 166.7 (C=N), 146.8, 141.9, 135.4, 134.8, 131.3, 130.7, 129.7, 128.9, 127.5, 122.2, 121.7, 115.8, 115.5, 115.3.

**<sup>19</sup>F NMR (376 MHz, CDCl<sub>3</sub>)** δ -110.63, -119.57.

**HRMS (ESI)** *m/z* calcd for C<sub>21</sub>H<sub>15</sub>F<sub>2</sub>N [M+H]: 320.1251, found: 320.1253.

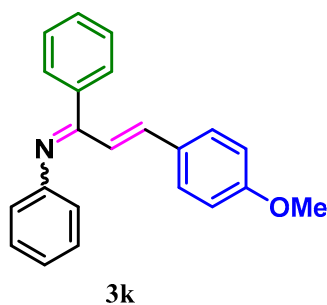

**(2E)-3-(4-methoxyphenyl)-N,1-diphenylprop-2-en-1-imine (3k):** Light yellow solid, 28.3 mg, 92% yield (Eluent: petroleum ether/ethyl acetate = 30/1).

**<sup>1</sup>H NMR (400 MHz, CDCl<sub>3</sub>)** δ 7.74 – 7.69 (m, 2H), 7.52 – 7.47 (m, 3H), 7.36 (t, *J* = 7.8 Hz, 2H), 7.28 – 7.24 (m, 2H), 7.16 – 7.11 (m, 2H), 6.87 – 6.80 (m, 3H), 3.79 (s, 3H).

**<sup>13</sup>C NMR (101 MHz, CDCl<sub>3</sub>)** δ 167.5 (C=N), 160.7, 151.0, 141.5, 139.5, 129.7, 129.4, 129.0, 128.8, 128.6, 128.3, 123.8, 120.8, 119.7, 114.2, 55.3.

**HRMS (ESI)** *m/z* calcd for C<sub>22</sub>H<sub>19</sub>NO [M+H]: 314.1545, found: 313.2672.

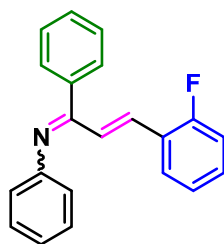

3l

**(2E)-3-(2-fluorophenyl)-N,1-diphenylprop-2-en-1-imine (3l):** Light yellow solid, 27.0 mg, 89% yield (Eluent: petroleum ether/ethyl acetate = 40/1).

**<sup>1</sup>H NMR (400 MHz, CDCl<sub>3</sub>)** δ 7.78 – 7.70 (m, 1H), 7.54 – 7.46 (m, 2H), 7.42 – 7.35 (m, 2H), 7.27 (dq, *J* = 13.9, 3.2 Hz, 2H), 7.19 – 7.04 (m, 3H), 6.98 (ddd, *J* = 16.0, 8.7, 1.2 Hz, 3H), 6.88 (s, 1H).

**<sup>13</sup>C NMR (101 MHz, CDCl<sub>3</sub>)** δ 166.7 (C=N), 150.7, 140.2, 137.9, 133.0, 130.3, 130.3, 129.3, 128.9, 128.4, 124.2, 123.1, 120.7, 116.3, 116.1, 113.9, 113.7.

**HRMS (ESI)** *m/z* calcd for C<sub>21</sub>H<sub>16</sub>FN [M+H]: 302.1345, found: 302.1342.

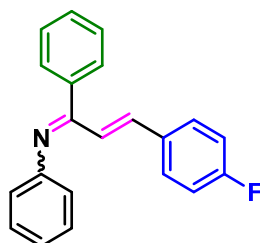

3m

**(2E)-3-(4-fluorophenyl)-N,1-diphenylprop-2-en-1-imine (3m):** Light yellow solid, 26.8 mg, 86% yield (Eluent: petroleum ether/ethyl acetate = 40/1).

**<sup>1</sup>H NMR (400 MHz, CDCl<sub>3</sub>)** δ 7.76 – 7.70 (m, 1H), 7.56 – 7.44 (m, 2H), 7.41 – 7.21 (m, 4H), 7.20 – 7.04 (m, 3H), 7.02 – 6.86 (m, 4H).

**<sup>13</sup>C NMR (101 MHz, CDCl<sub>3</sub>)** δ 166.7 (C=N), 161.8, 150.7, 140.2, 137.9, 132.9, 130.0, 129.3, 128.9, 128.9, 128.4, 123.1, 120.7, 116.1, 113.7.

**<sup>19</sup>F NMR (376 MHz, CDCl<sub>3</sub>)** δ -112.69.

**HRMS (ESI)** *m/z* calcd for C<sub>21</sub>H<sub>16</sub>FN [M+H]: 302.1345, found: 302.1348.

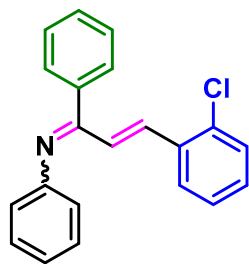

**3n**

**(2E)-3-(2-chlorophenyl)-N,1-diphenylprop-2-en-1-imine (3n):** Light yellow solid, 28.1 mg, 86% yield (Eluent: petroleum ether/ethyl acetate = 40/1).

**<sup>1</sup>H NMR (400 MHz, CDCl<sub>3</sub>)** δ 7.83 – 7.72 (m, 2H), 7.51 – 7.49 (m, 2H), 7.38 – 7.35 (m, 3H), 7.29 – 7.23 (m, 2H), 7.17 – 7.12 (m, 2H), 7.00 – 6.94 (m, 2H), 6.84 (d, *J* = 16.5 Hz, 1H).

**<sup>13</sup>C NMR (101 MHz, CDCl<sub>3</sub>)** δ 166.8 (C=N), 150.9, 139.0, 137.5, 134.3, 134.1, 130.2, 129.9, 129.4, 128.9, 128.6, 128.4, 127.3, 127.0, 124.4, 124.1, 120.7.

**HRMS (ESI)** *m/z* calcd for C<sub>21</sub>H<sub>16</sub>ClN [M+H]: 318.1050, found: 318.1042.

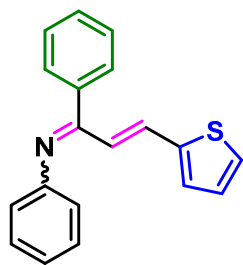

**3o**

**(2E)-N,1-diphenyl-3-(thiophen-2-yl)prop-2-en-1-imine (3o):** Light yellow solid, 24.6 mg, 85% yield (Eluent: petroleum ether/ethyl acetate = 40/1).

**<sup>1</sup>H NMR (400 MHz, CDCl<sub>3</sub>)** δ 7.76 – 7.66 (m, 1H), 7.52 – 7.43 (m, 2H), 7.41 – 7.23 (m, 3H), 7.18 – 6.83 (m, 6H), 6.74 – 6.62 (m, 1H).

**<sup>13</sup>C NMR (101 MHz, CDCl<sub>3</sub>)** δ 166.8 (C=N), 150.8, 141.0, 139.2, 137.2, 134.4, 132.8, 132.1, 129.3, 128.8, 128.4, 124.0, 121.0, 120.8.

**HRMS (ESI)** *m/z* calcd for C<sub>19</sub>H<sub>15</sub>NS [M+H]: 290.1003, found: 290.1001.

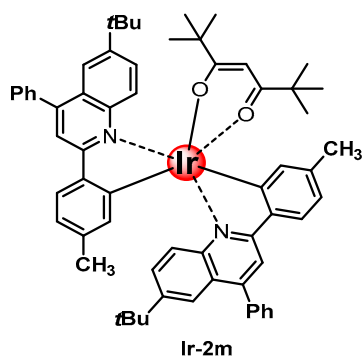

**Ir-2m:** red solid, 710.4 mg, 66% yield (Eluent: petroleum ether/dichloromethane = 10/1).



**<sup>1</sup>H NMR (400 MHz, CDCl<sub>3</sub>)** δ 8.19 (d, *J* = 9.2 Hz, 2H), 7.84 (s, 2H), 7.68 – 7.59 (m, 4H), 7.58 – 7.45 (m, 10H), 7.29 (dd, *J* = 9.2, 2.3 Hz, 2H), 6.68 (d, *J* = 7.9 Hz, 2H), 6.55 (s, 2H), 4.75 (s, 1H), 1.96 (s, 6H), 1.18 (s, 18H), 0.56 (s, 18H).

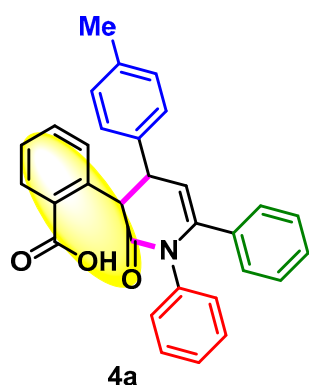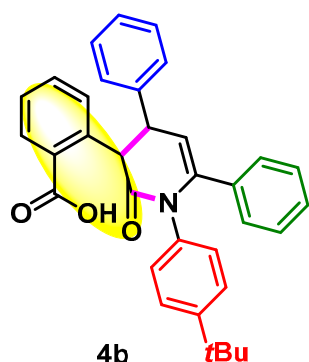

**<sup>13</sup>C NMR (101 MHz, DMSO)** δ 170.5, 169.3, 149.0, 142.4, 142.0, 139.4, 136.7, 136.5, 132.0, 131.1, 131.1, 128.9, 128.5, 128.3, 128.2, 128.2, 127.9, 127.4, 127.2, 125.3, 115.1, 45.0, 34.6, 31.5.

**HRMS (ESI)** *m/z* calcd for C<sub>34</sub>H<sub>31</sub>NO<sub>3</sub> [M+H]: 502.2382, found: 502.2381.

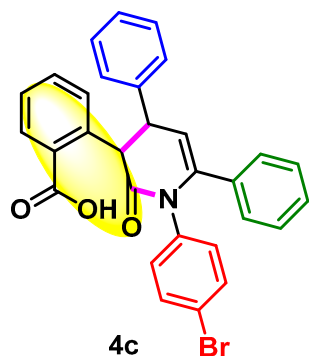

**4c:** Light yellow solid, 403.7 mg, 77% yield (Eluent: dichloromethane/methyl alcohol = 100/1).

**<sup>1</sup>H NMR (400 MHz, DMSO)** δ 13.05 (s, 1H), 7.84 (dd, *J* = 8.0, 1.5 Hz, 1H), 7.47 – 7.36 (m, 3H), 7.34 – 7.27 (m, 4H), 7.30 – 7.19 (m, 6H), 7.22 – 7.11 (m, 4H), 5.63 (d, *J* = 4.0 Hz, 1H), 5.11 (d, *J* = 9.7 Hz, 1H), 4.44 (dd, *J* = 9.7, 4.0 Hz, 1H).

**<sup>13</sup>C NMR (101 MHz, DMSO)** δ 170.4, 169.2, 142.4, 141.4, 139.3, 138.8, 136.2, 132.0, 131.6, 131.2, 131.1, 130.9, 128.9, 128.6, 128.4, 128.3, 128.1, 127.4, 127.3, 119.5, 115.6, 45.0.

**HRMS (ESI)** *m/z* calcd for C<sub>30</sub>H<sub>22</sub>BrNO<sub>3</sub> [M+H]: 524.0861, found: 524.0860.

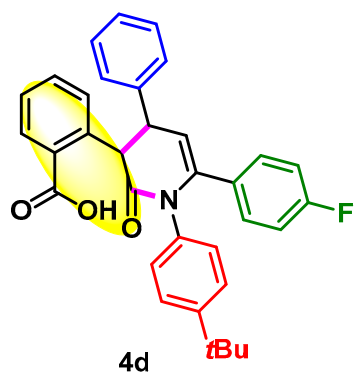

**4d:** White solid, 374.7 mg, 74% yield (Eluent: dichloromethane/methyl alcohol = 100/1).

**<sup>1</sup>H NMR (400 MHz, DMSO)** δ 13.10 (s, 1H), 7.84 (d, *J* = 7.7 Hz, 1H), 7.43 – 7.33 (m, 3H), 7.28 (dd, *J* = 14.6, 8.5 Hz, 8H), 7.18 (t, *J* = 7.1 Hz, 1H), 7.11 (d, *J* = 8.1 Hz, 2H), 7.02 (t, *J* = 8.6 Hz, 2H), 5.61 (d, *J* = 4.2 Hz, 1H), 5.10 (d, *J* = 9.2 Hz, 1H), 4.45 – 4.37 (m, 1H), 1.20 (s, 9H).

**<sup>13</sup>C NMR (101 MHz, DMSO)** δ 170.3, 169.3, 163.0, 160.6, 149.2, 142.4, 141.0, 139.4, 136.6, 133.0, 132.9, 132.0, 131.2, 131.1, 130.2, 130.1, 128.9, 128.3, 128.2, 127.4, 127.2, 125.4, 115.5, 115.3, 115.1, 45.0, 34.7, 31.5.

**<sup>19</sup>F NMR (376 MHz, DMSO)** δ -113.86.

**HRMS (ESI)**  $m/z$  calcd for  $C_{34}H_{30}FNO_3$   $[M+H]$ : 520.2288, found: 520.2286.

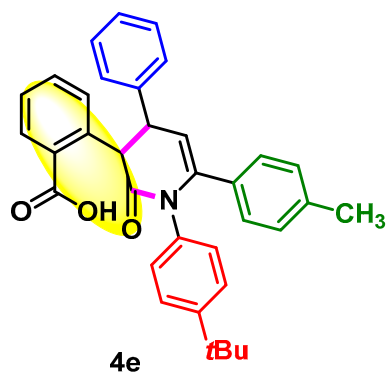

**4e:** Light yellow solid, 408.1 mg, 79% yield (Eluent: dichloromethane/methyl alcohol = 100/1).

**$^1H$  NMR (400 MHz, DMSO)**  $\delta$  13.07 (s, 1H), 7.83 (dd,  $J$  = 7.8, 1.4 Hz, 1H), 7.46 – 7.23 (m, 9H), 7.19 (dd,  $J$  = 10.5, 7.6 Hz, 3H), 7.10 (d,  $J$  = 8.3 Hz, 2H), 7.00 (d,  $J$  = 7.9 Hz, 2H), 5.57 (d,  $J$  = 4.4 Hz, 1H), 5.11 (d,  $J$  = 8.9 Hz, 1H), 4.35 (dd,  $J$  = 9.0, 4.4 Hz, 1H), 2.18 (s, 3H), 1.20 (s, 9H).

**$^{13}C$  NMR (101 MHz, DMSO)**  $\delta$  170.5, 169.3, 149.0, 141.9, 139.4, 137.5, 136.8, 133.6, 132.0, 131.2, 129.1, 128.9, 128.2, 128.1, 127.8, 127.4, 127.2, 125.4, 114.6, 44.9, 34.7, 31.5, 21.1.

**HRMS (ESI)**  $m/z$  calcd for  $C_{35}H_{33}NO_3$   $[M+H]$ : 516.2539, found: 516.2541.

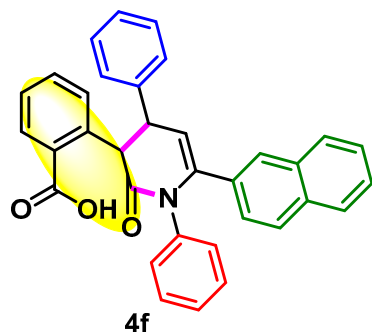

**4f:** Light yellow solid, 384.3 mg, 78% yield (Eluent: dichloromethane/methyl alcohol = 100/1).

**$^1H$  NMR (400 MHz, DMSO)**  $\delta$  13.12 (s, 1H), 7.95 (s, 1H), 7.84 (dd,  $J$  = 12.0, 6.7 Hz, 2H), 7.81 – 7.75 (m, 1H), 7.68 (d,  $J$  = 8.6 Hz, 1H), 7.50 – 7.15 (m, 15H), 7.04 (t,  $J$  = 7.3 Hz, 1H), 5.76 (d,  $J$  = 4.2 Hz, 1H), 5.20 (d,  $J$  = 9.5 Hz, 1H), 4.49 (dd,  $J$  = 9.6, 4.2 Hz, 1H).

**$^{13}C$  NMR (101 MHz, DMSO)**  $\delta$  170.4, 169.3, 142.5, 141.9, 139.4, 139.4, 134.0, 133.0, 132.6, 132.0, 131.2, 131.1, 129.0, 128.8, 128.6, 128.4, 128.3, 127.8, 127.7, 127.4, 127.3, 127.1, 126.9, 126.8, 125.8, 115.7, 45.1.

**HRMS (ESI)**  $m/z$  calcd for  $C_{34}H_{25}NO_3$   $[M+H]$ : 496.1913, found: 496.1916.

## 5. $^1\text{H}$ , $^{13}\text{C}$ and $^{19}\text{F}$ NMR Spectra

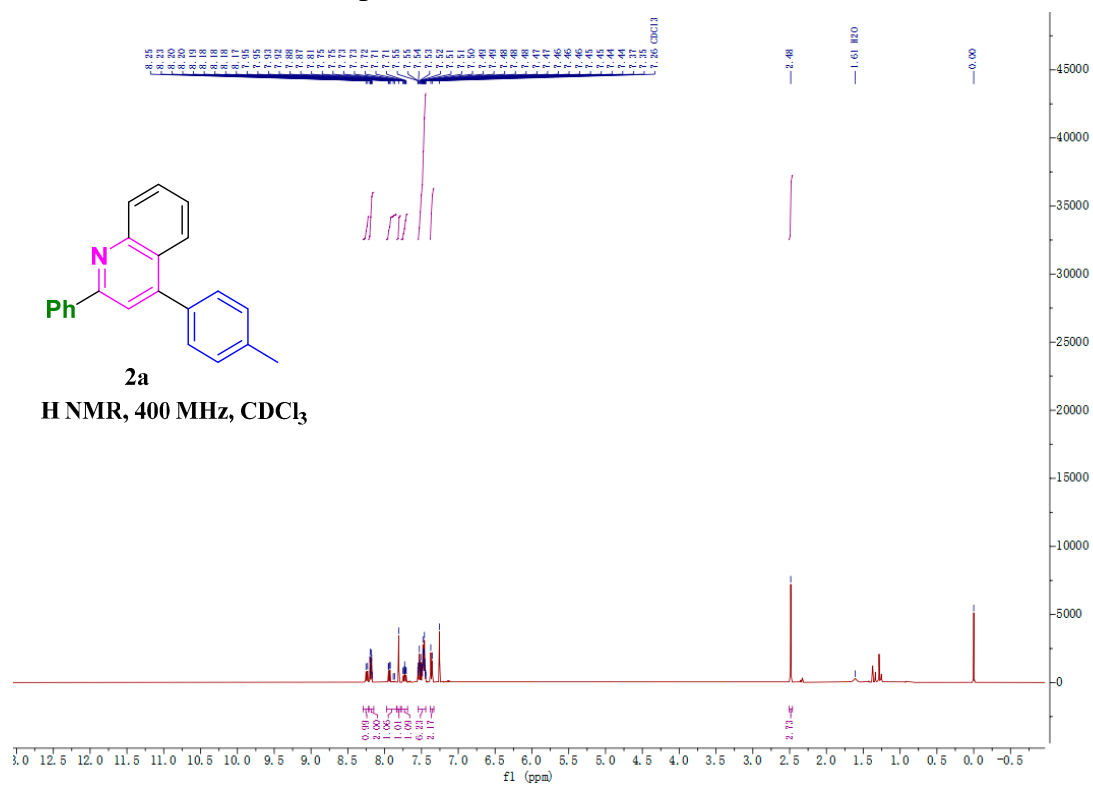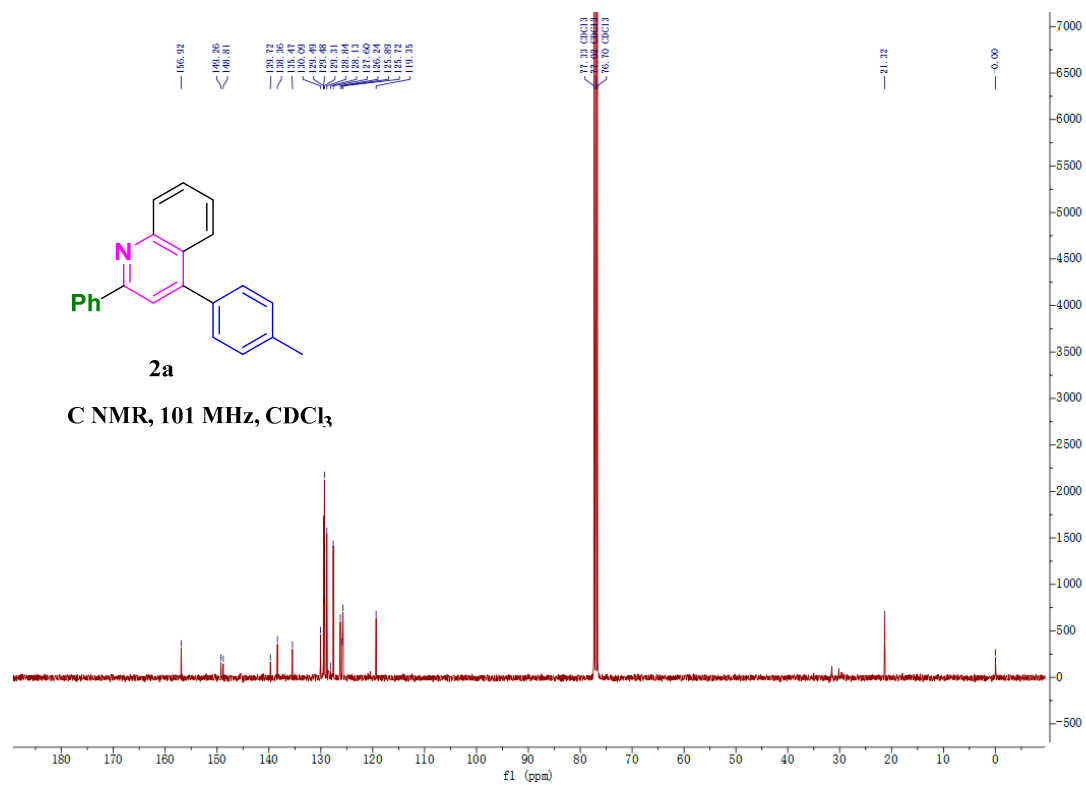

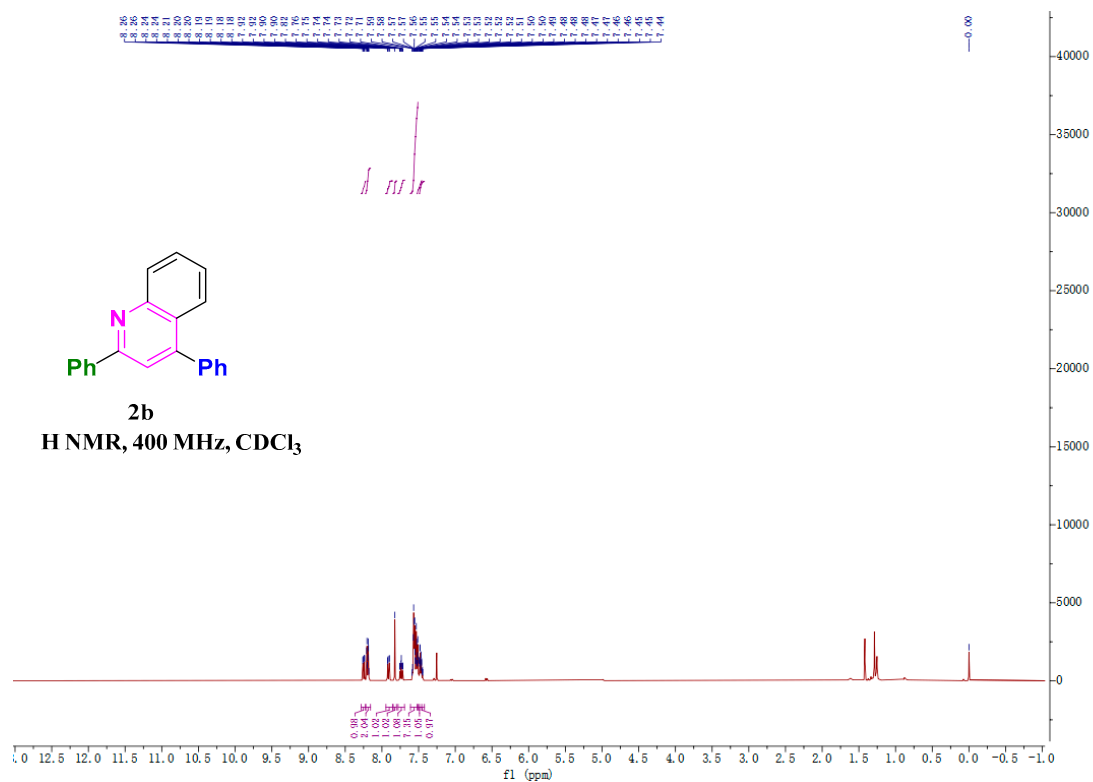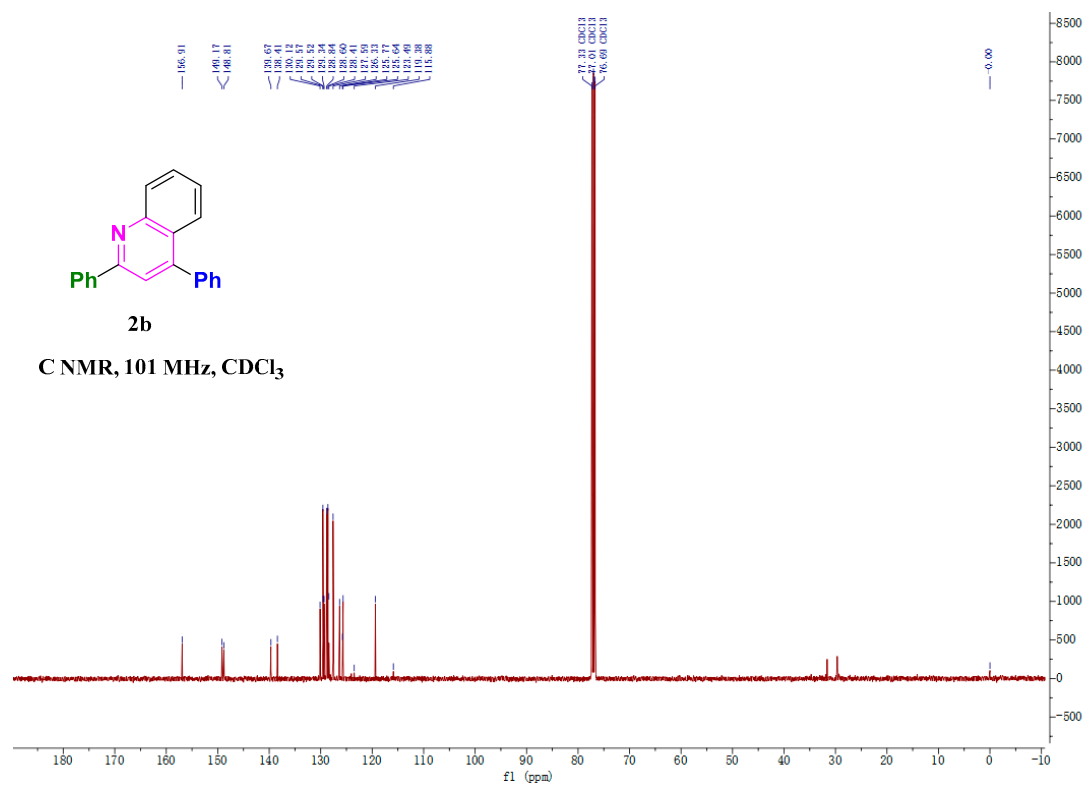

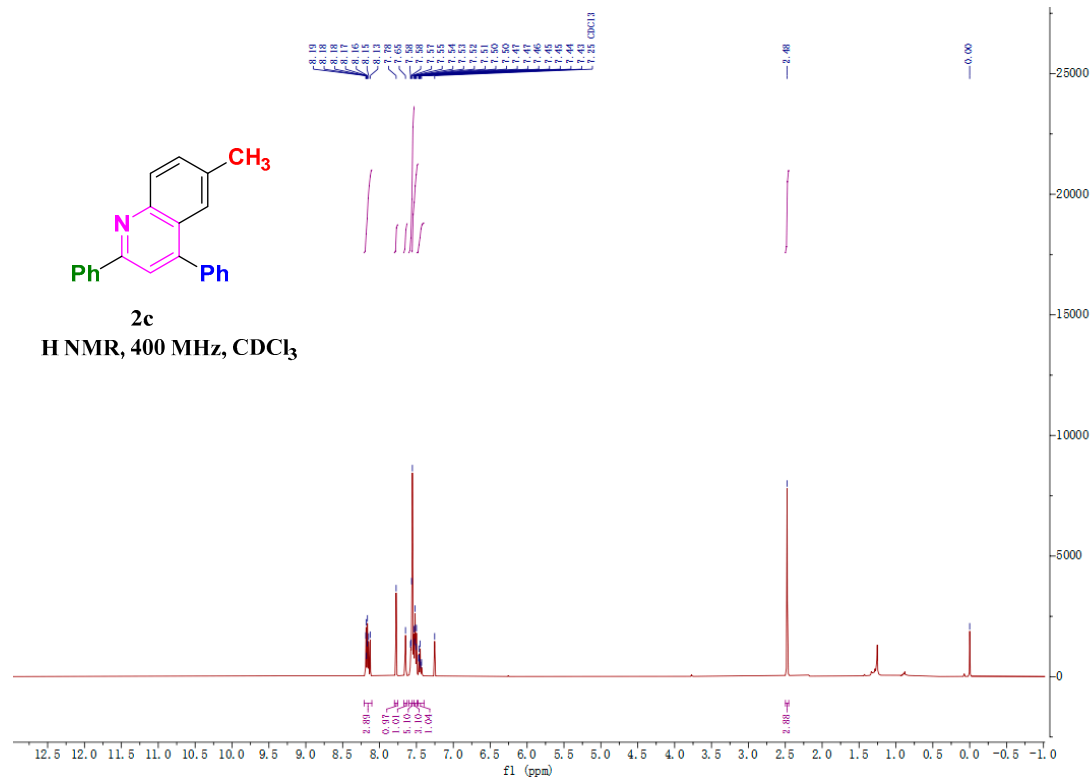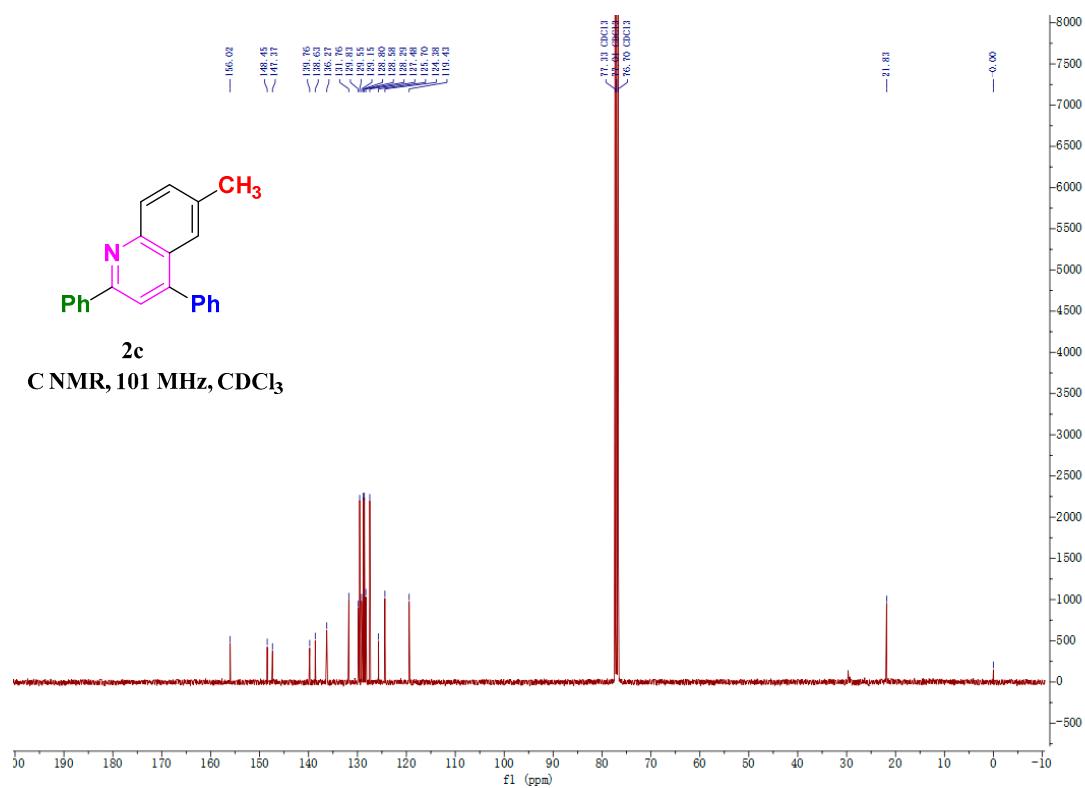

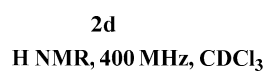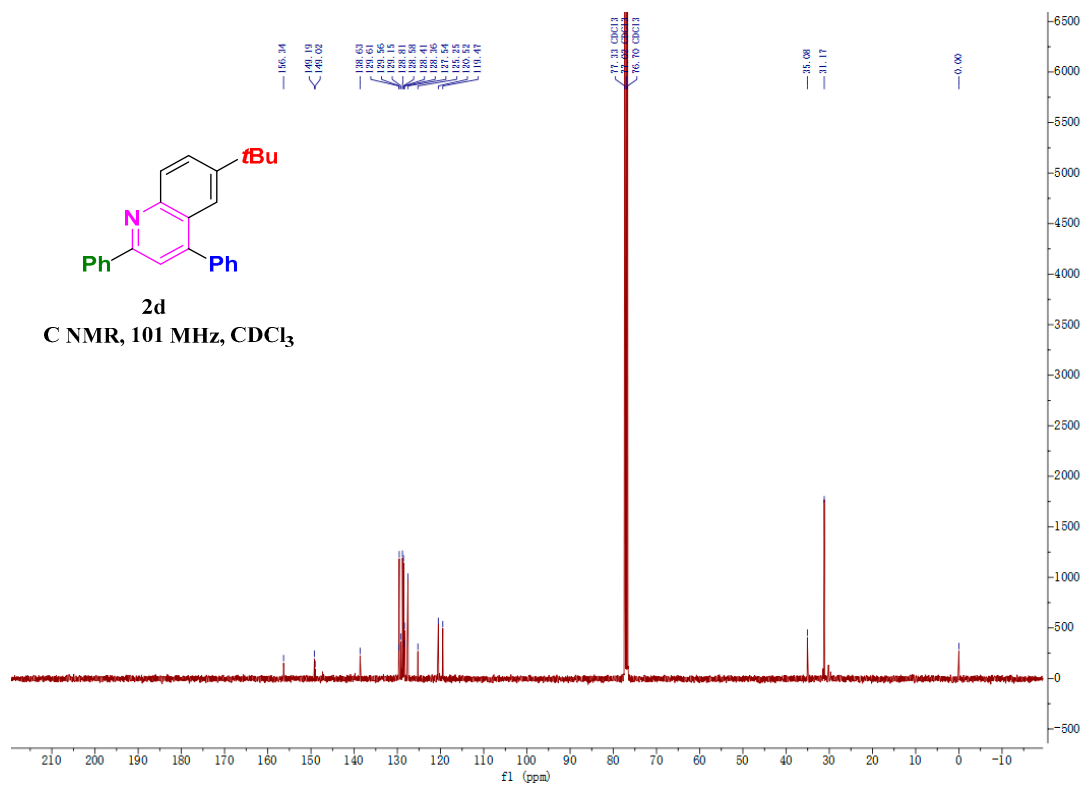

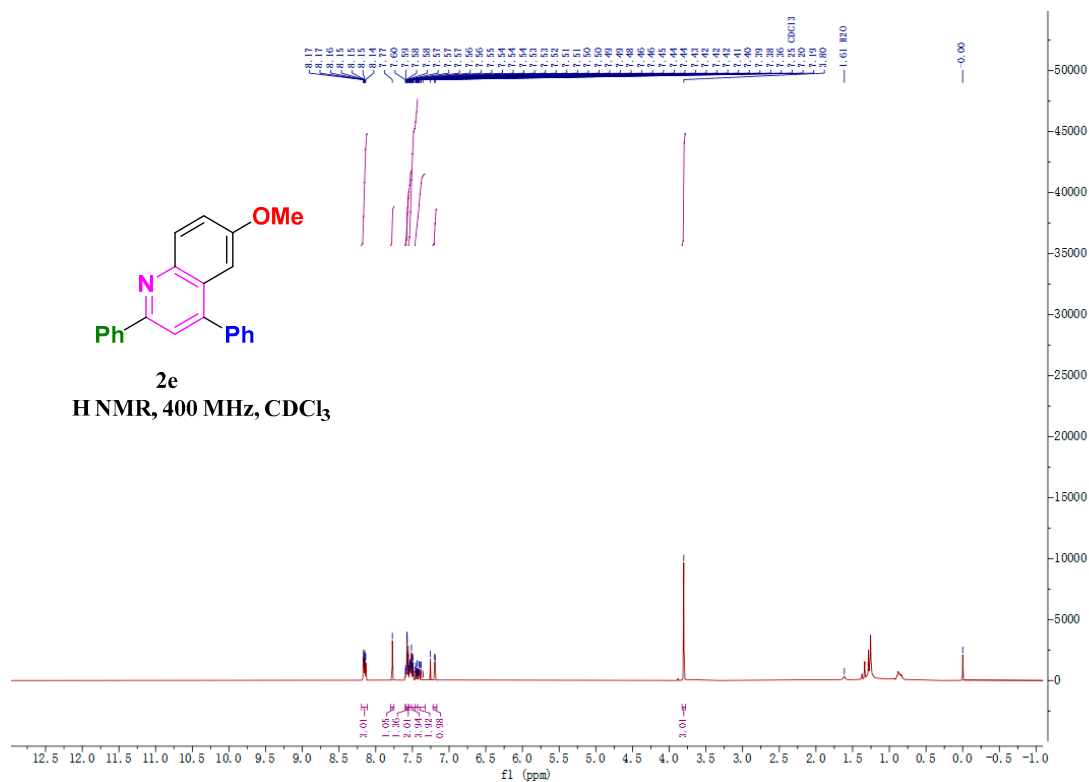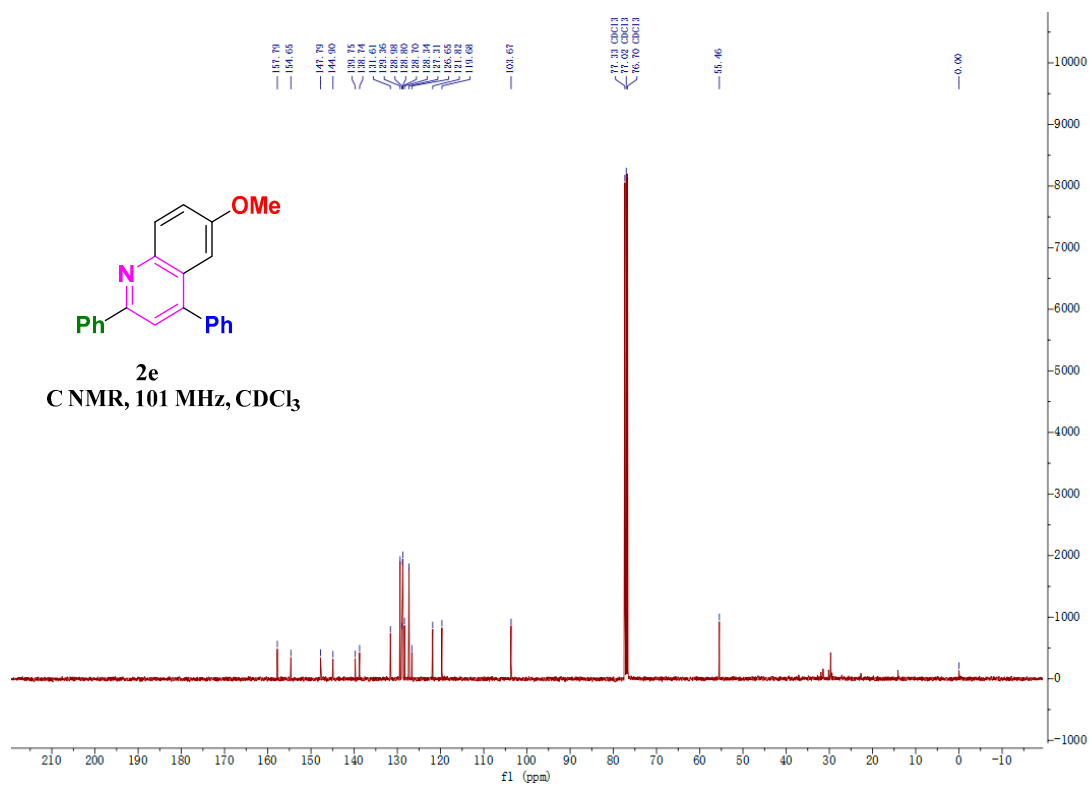



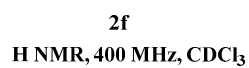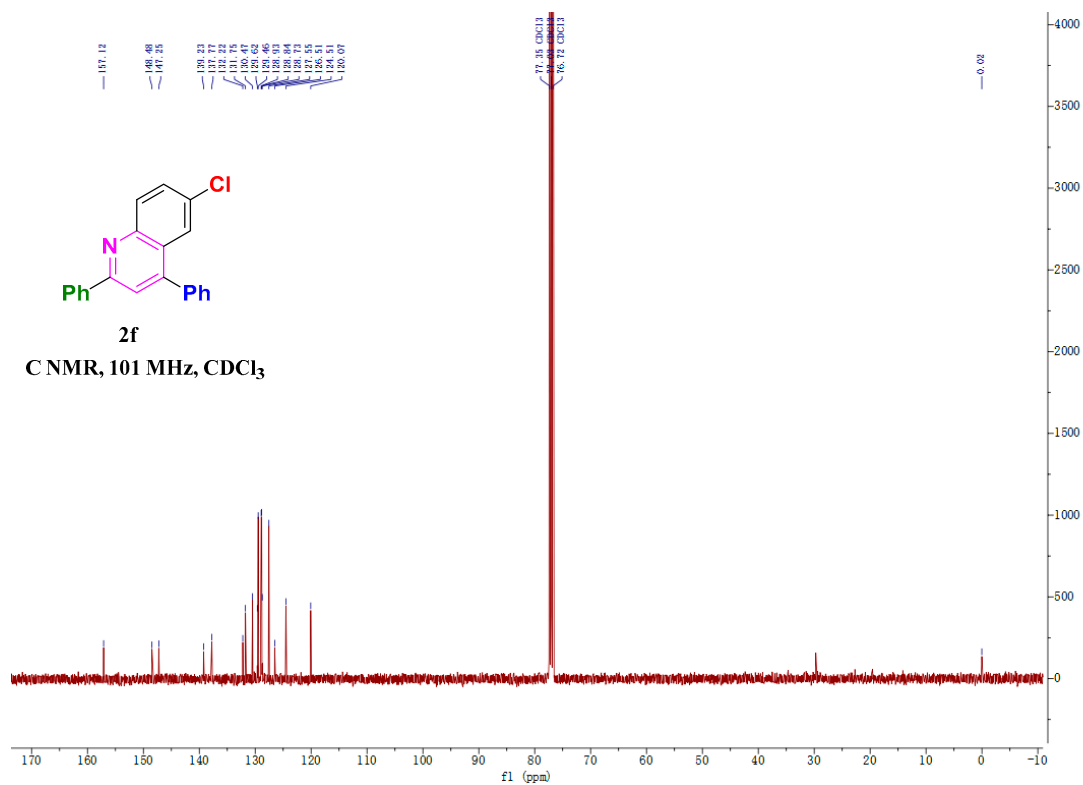

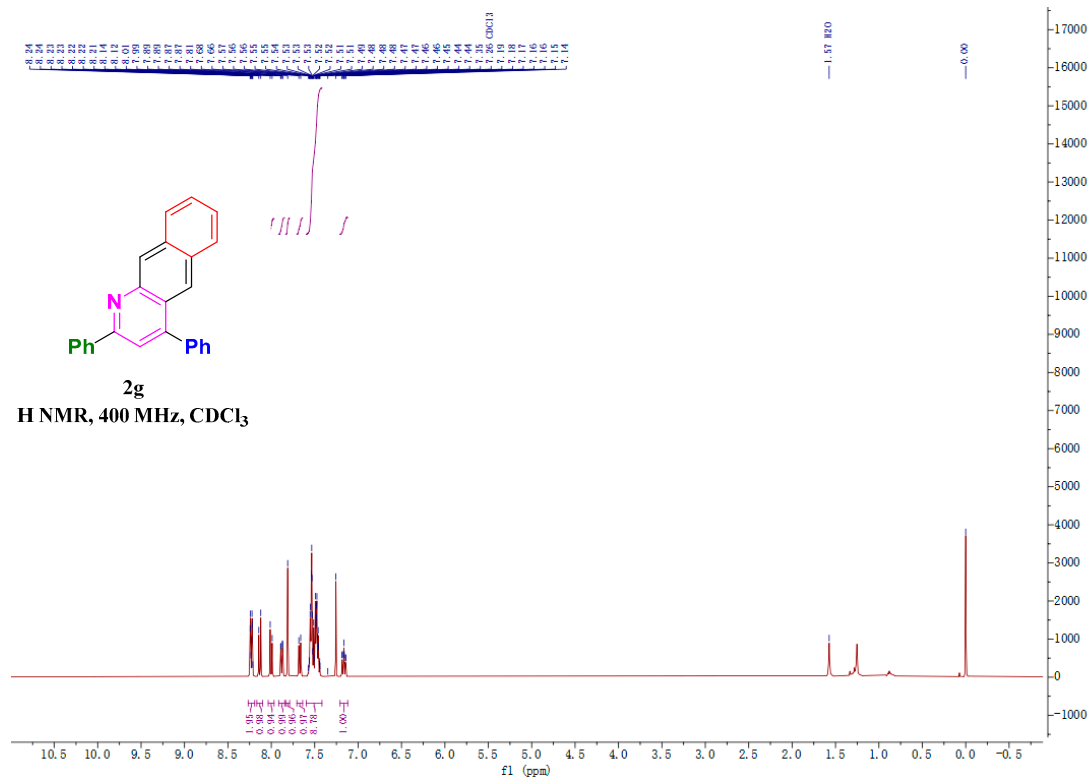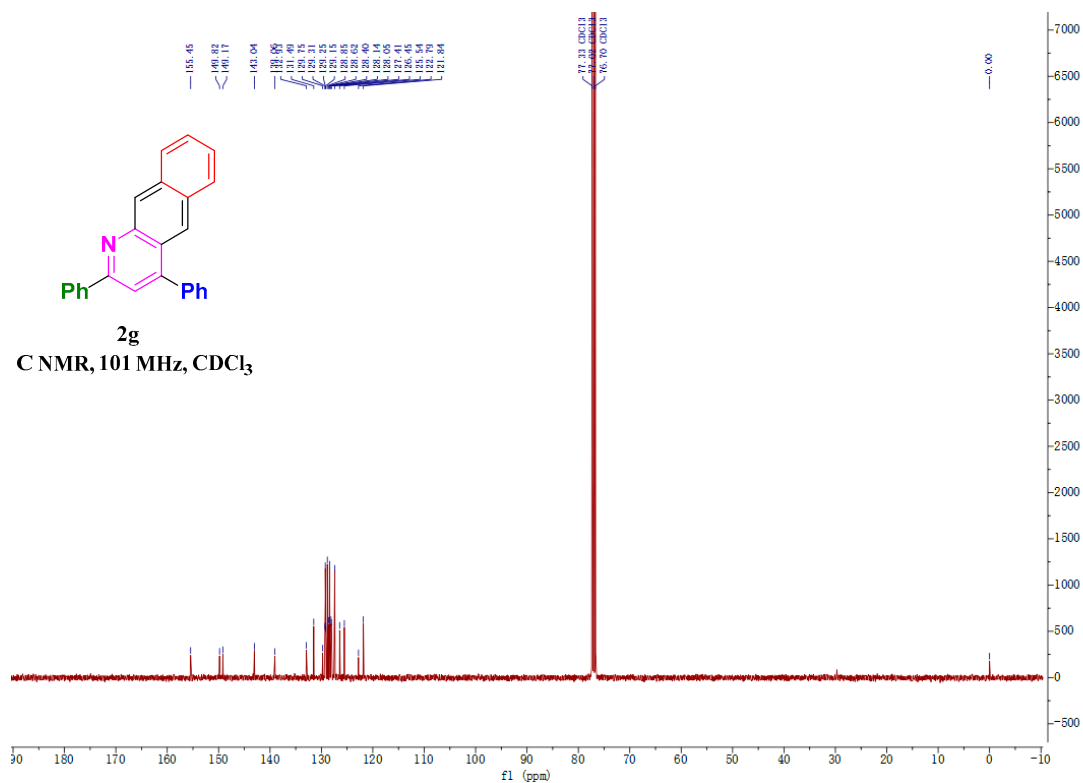

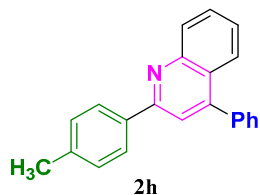

**H NMR, 400 MHz, CDCl<sub>3</sub>**

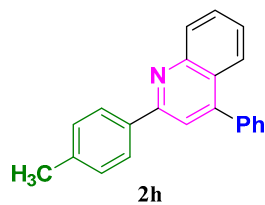

**C NMR, 101 MHz, CDCl<sub>3</sub>**

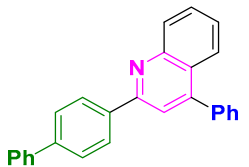

**2i**  
**<sup>1</sup>H NMR, 400 MHz, CDCl<sub>3</sub>**

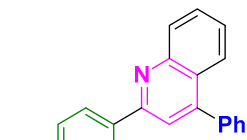

**2i**  
C NMR, 101 MHz, CDCl<sub>3</sub>



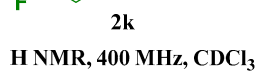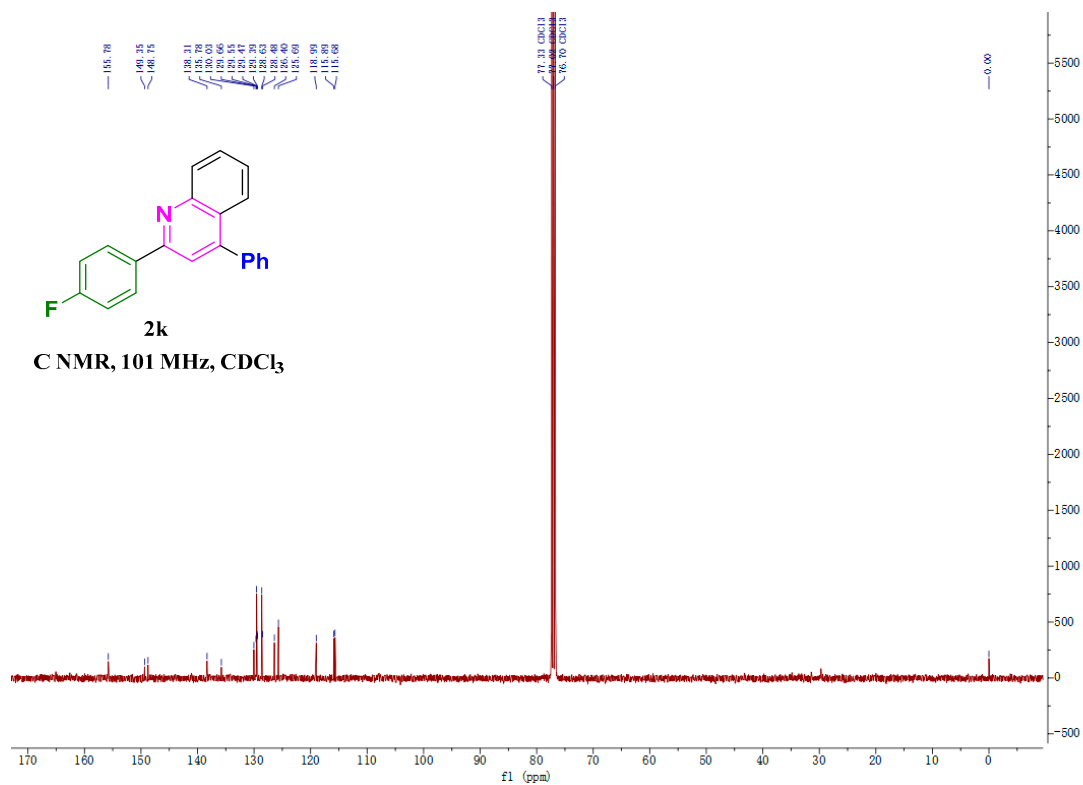

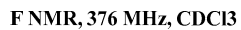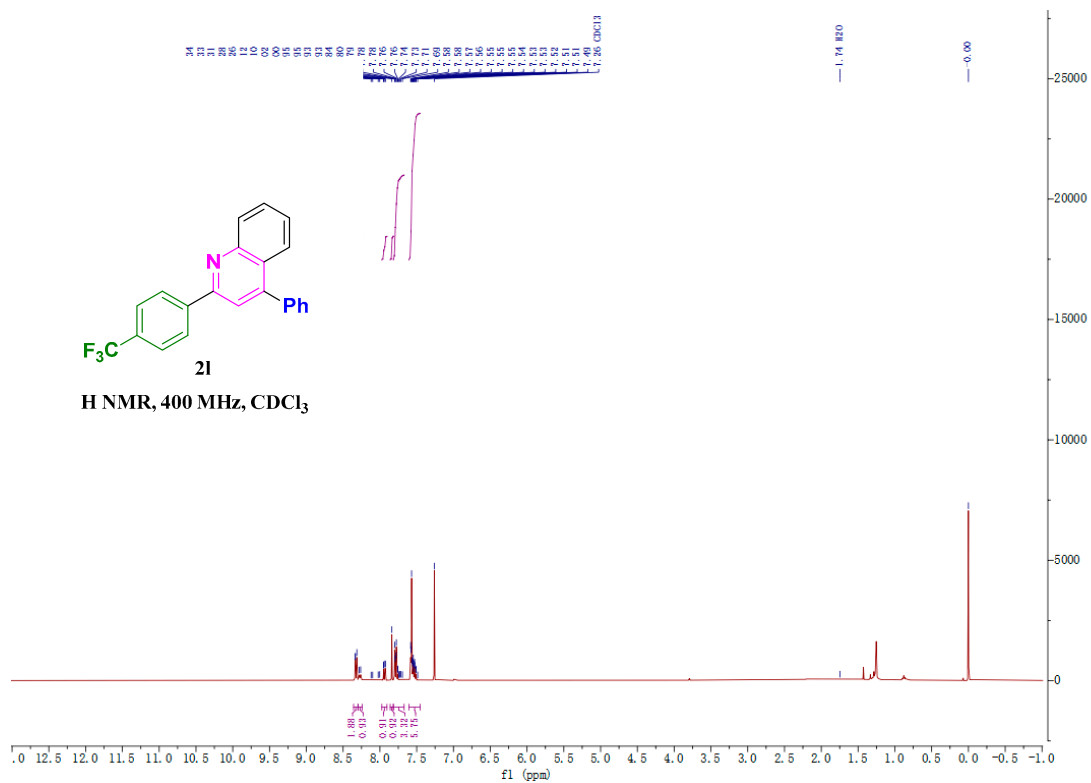





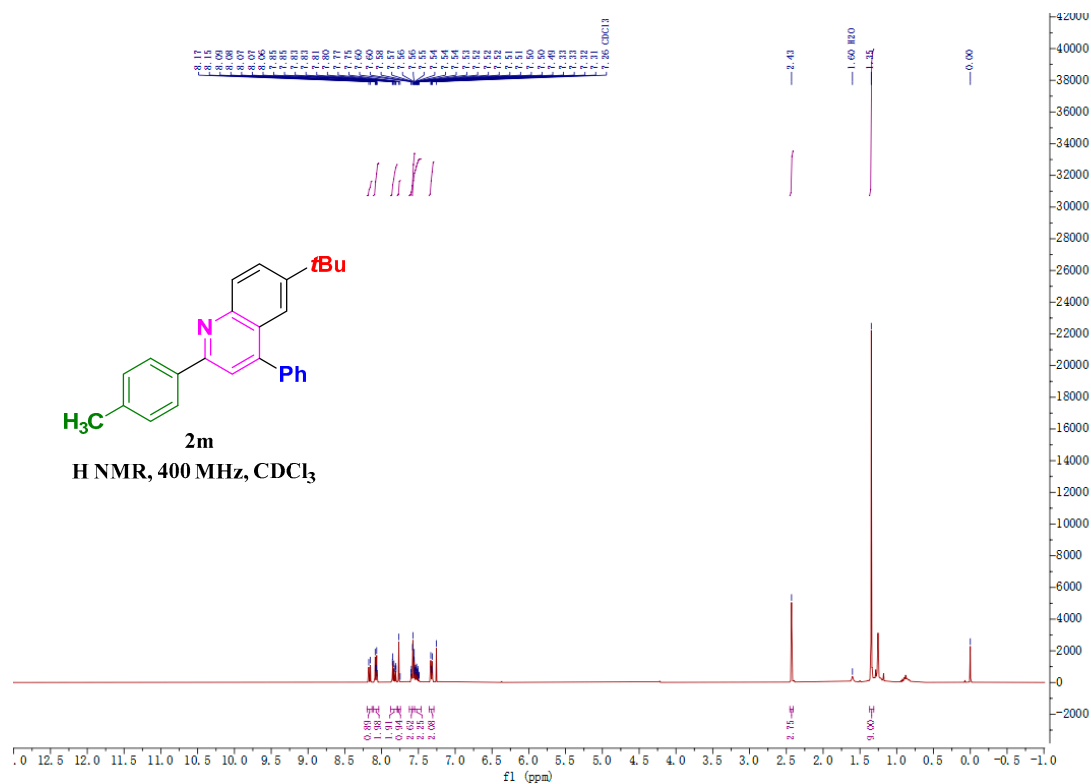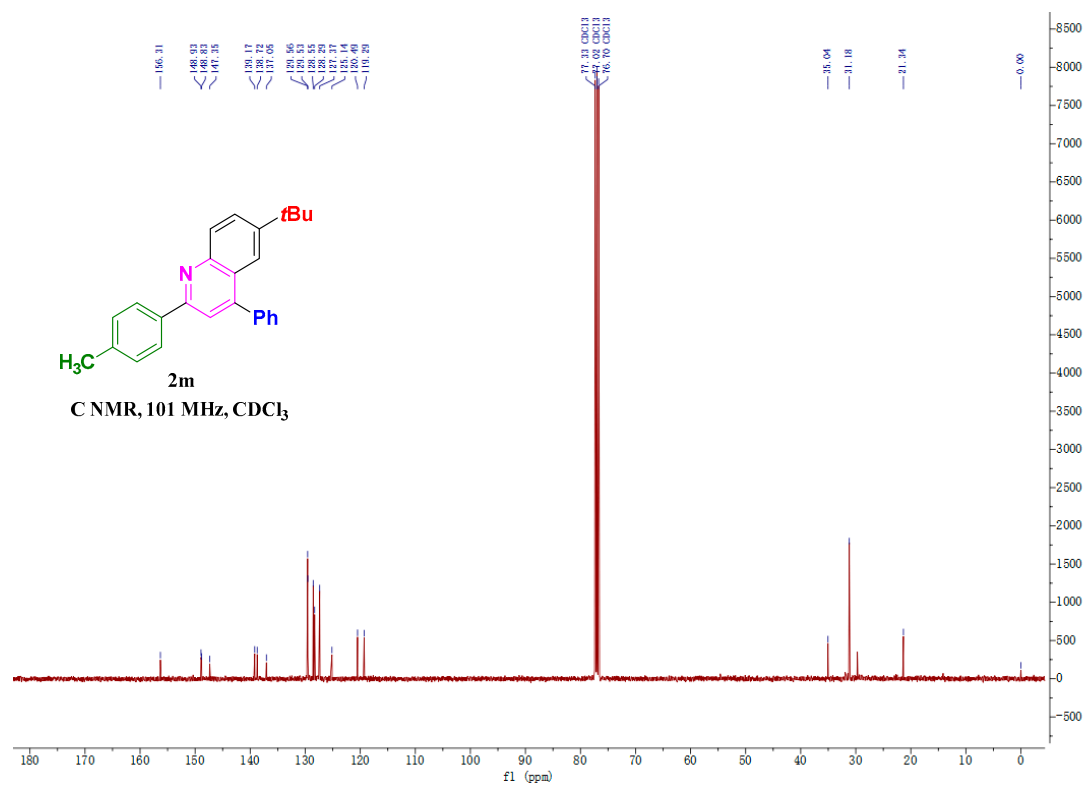

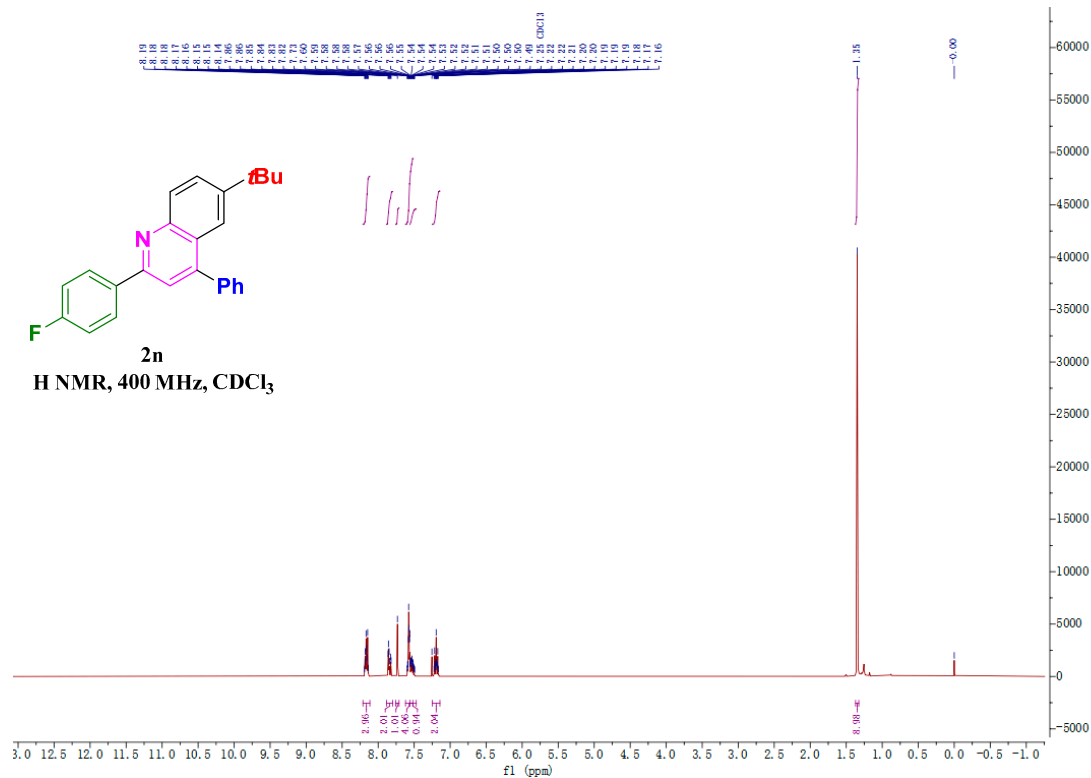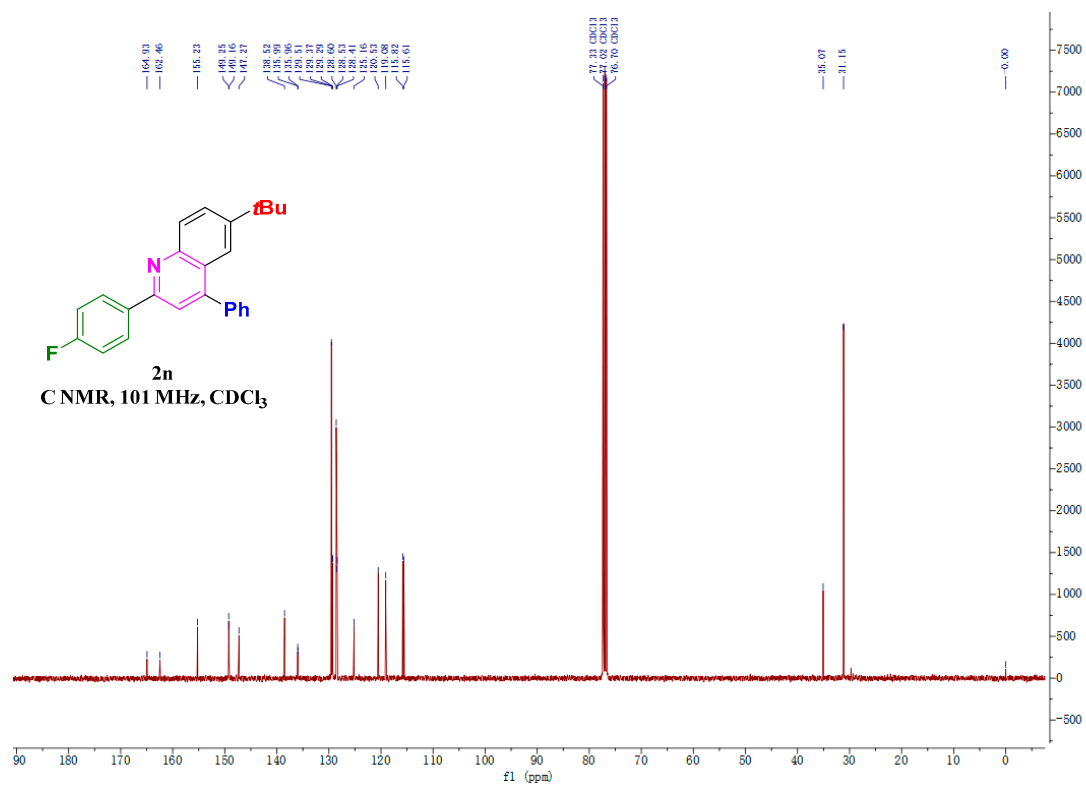

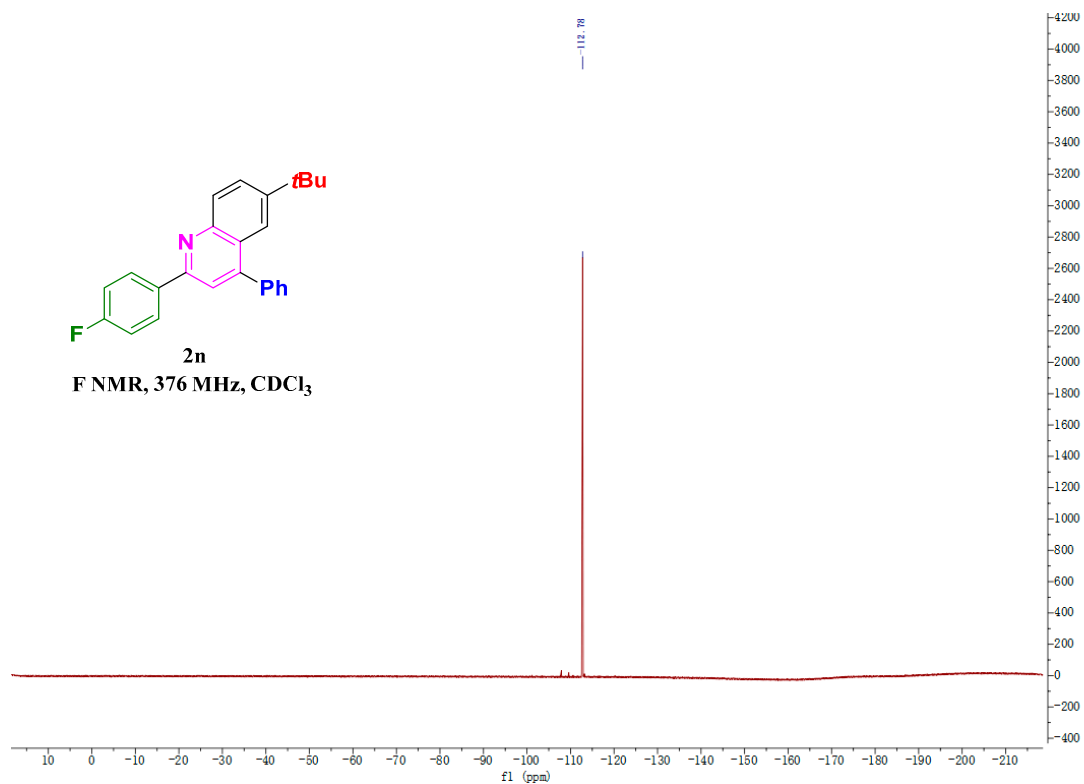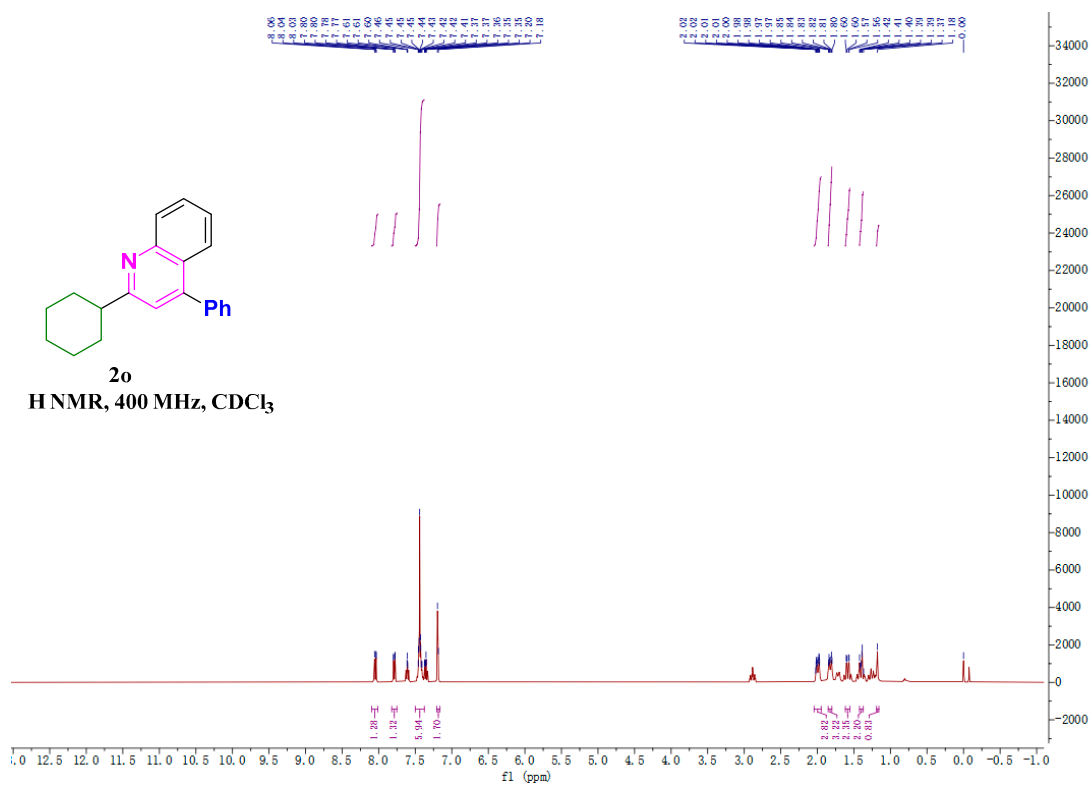

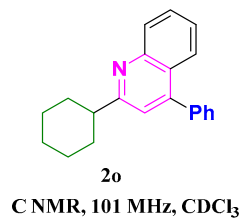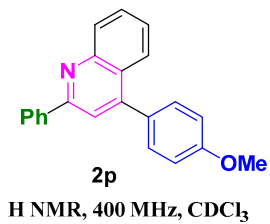

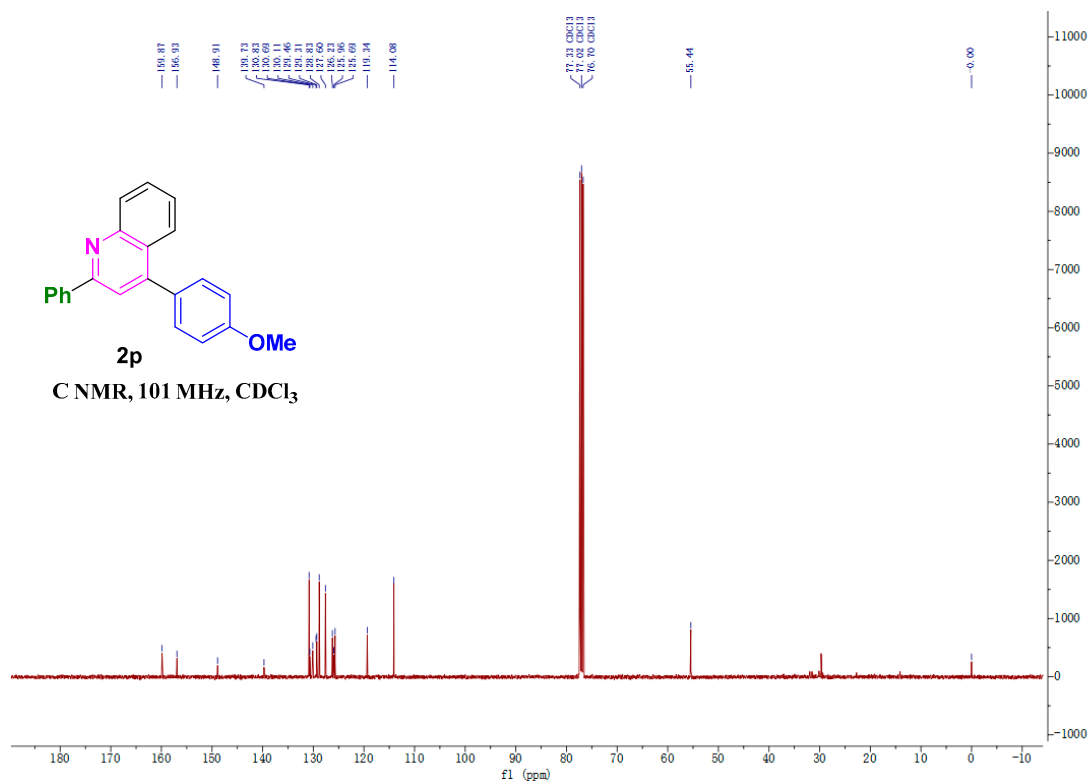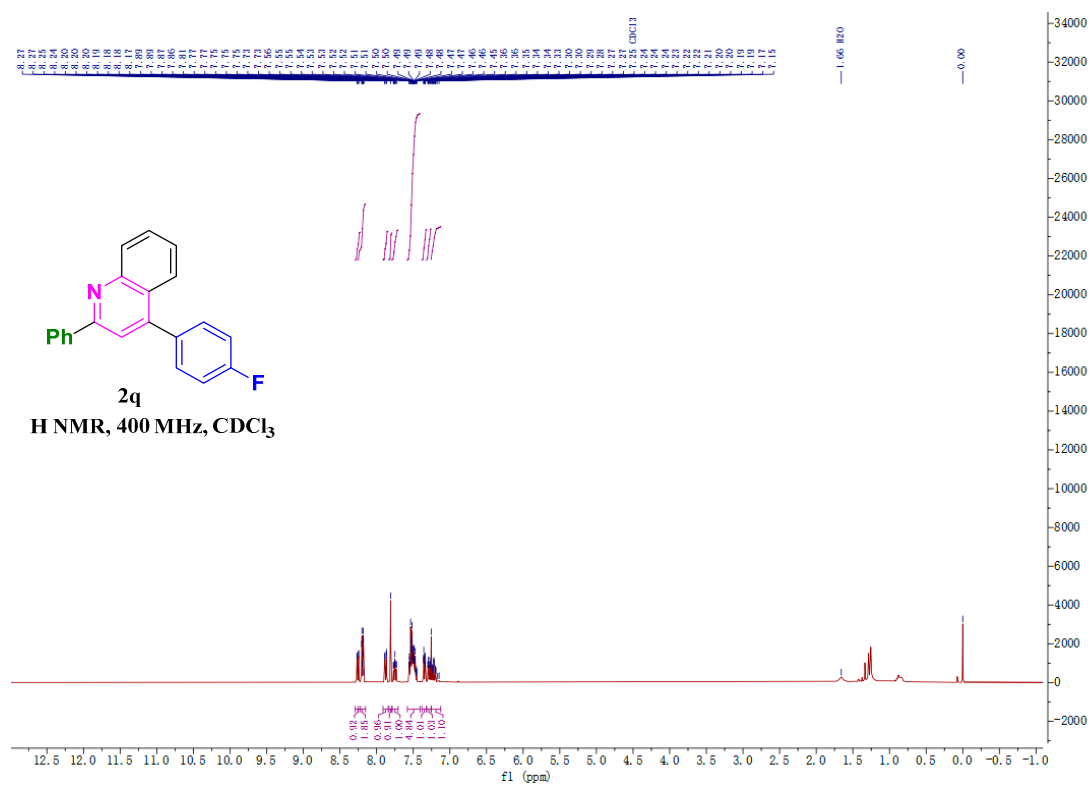

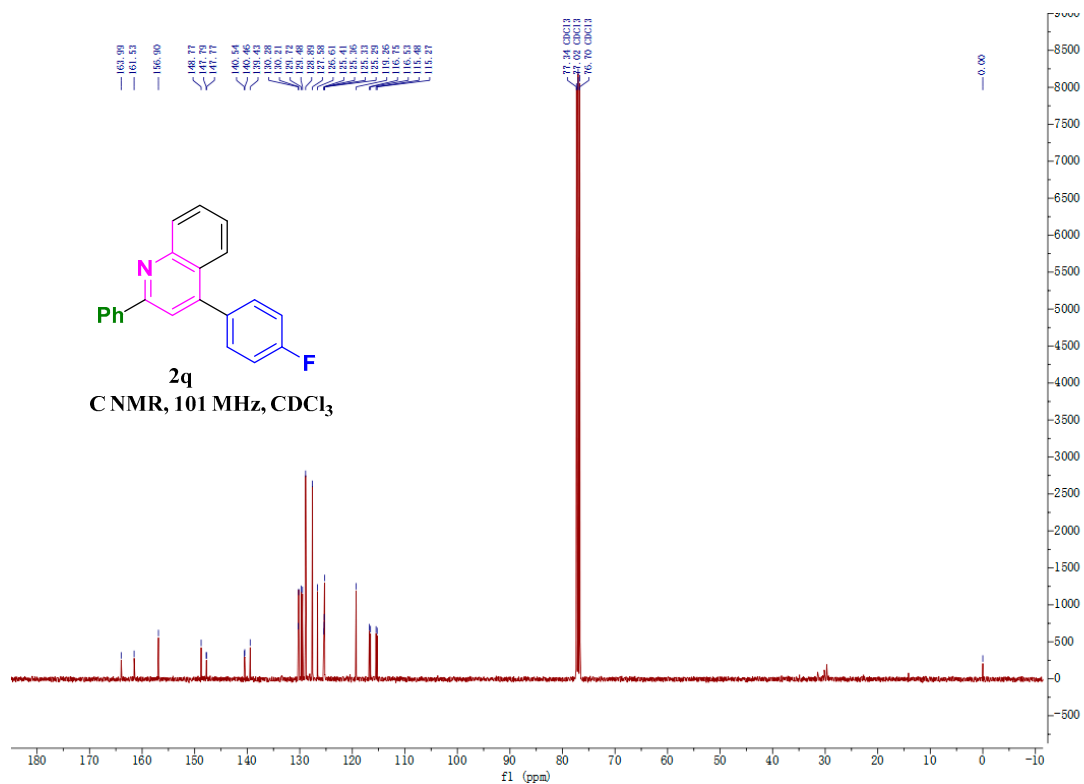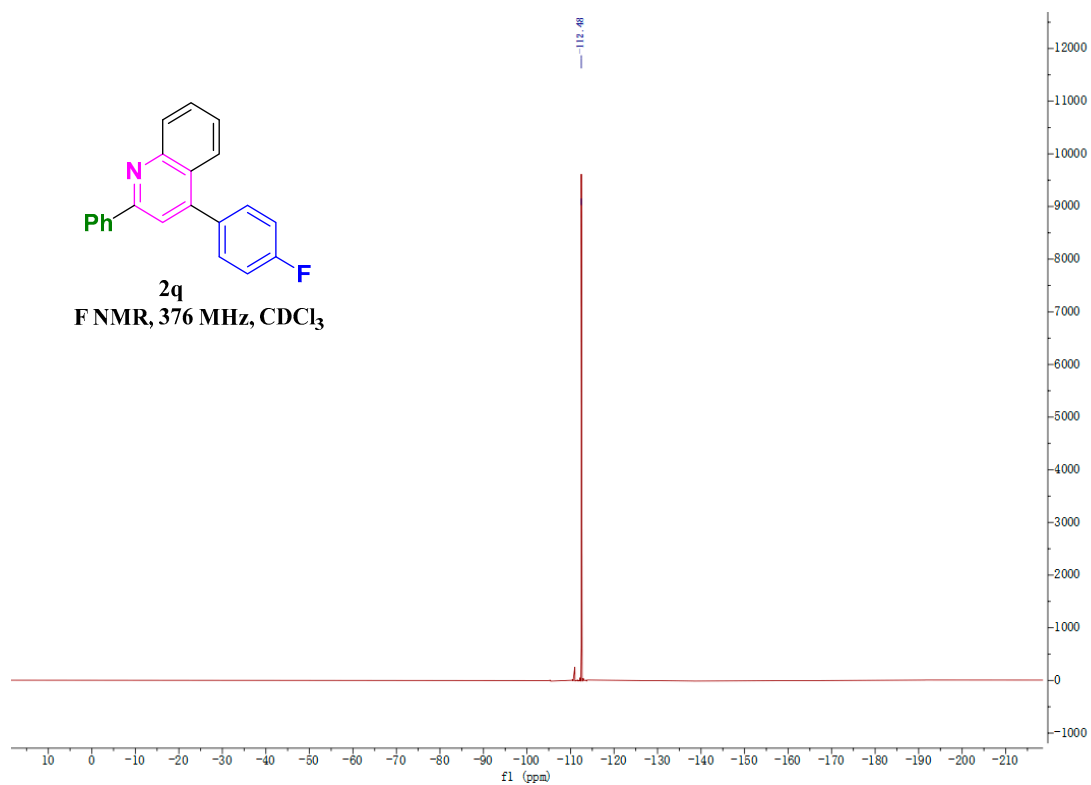

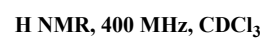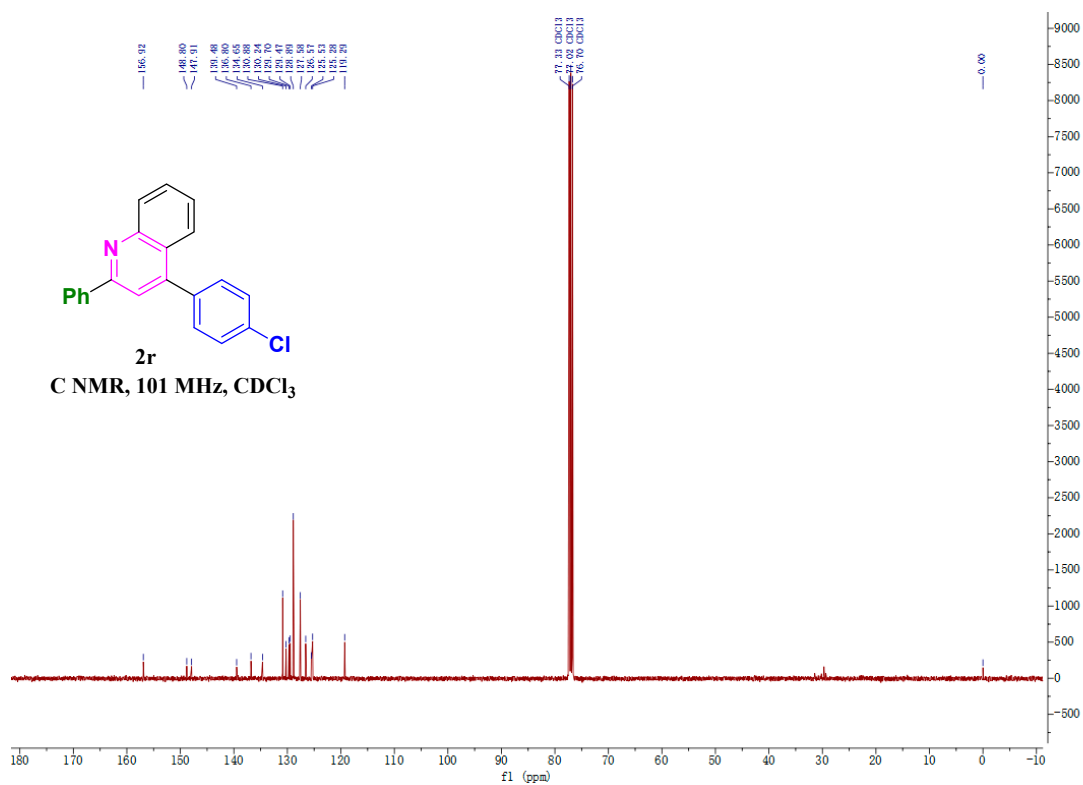

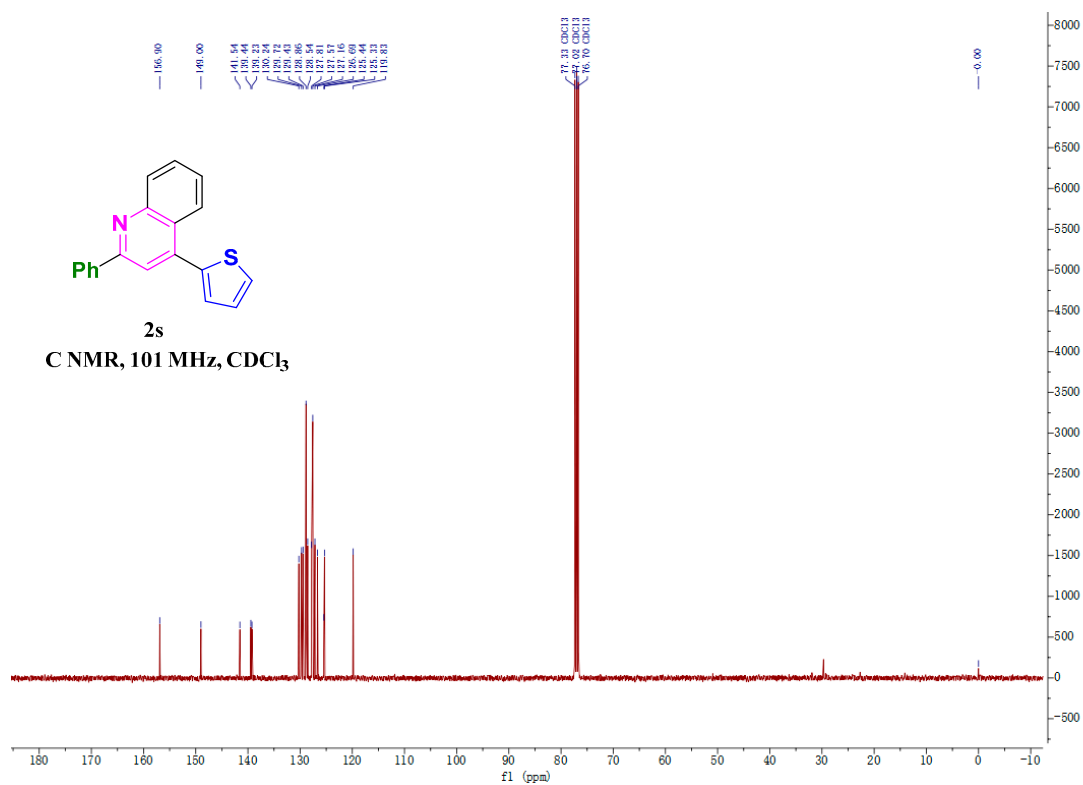



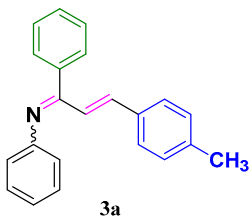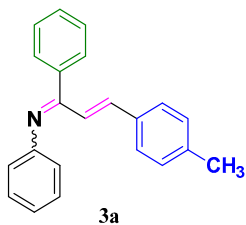

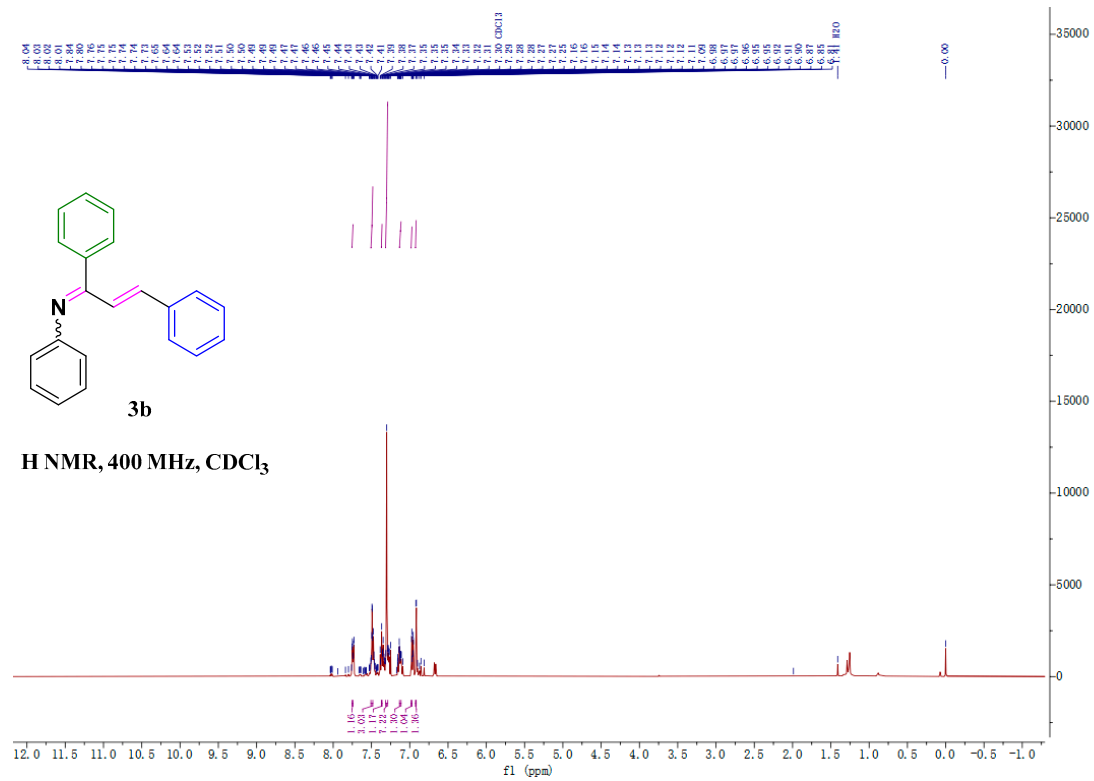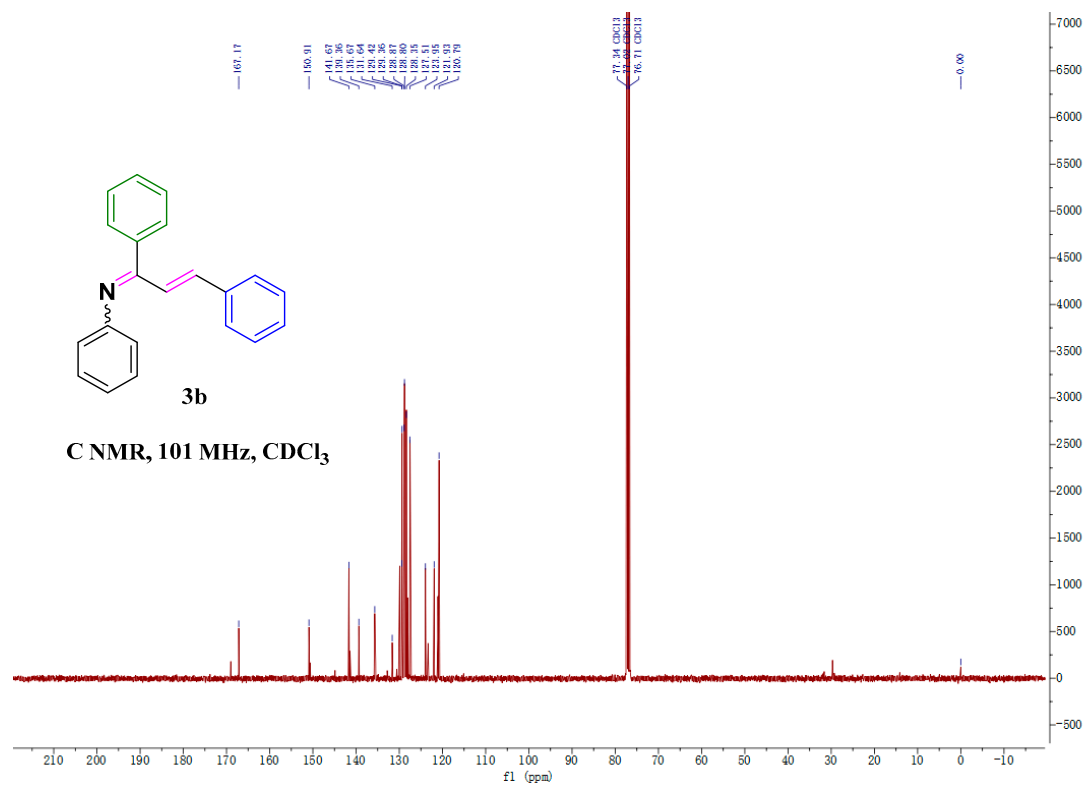

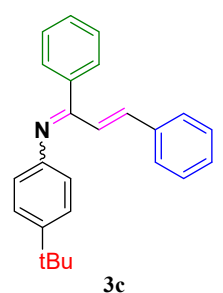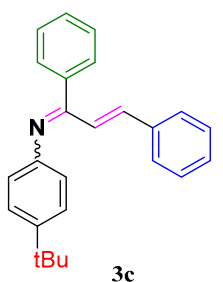

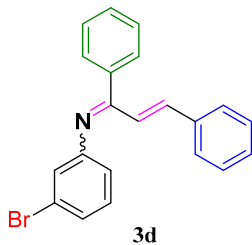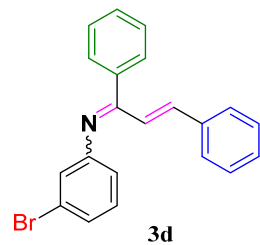

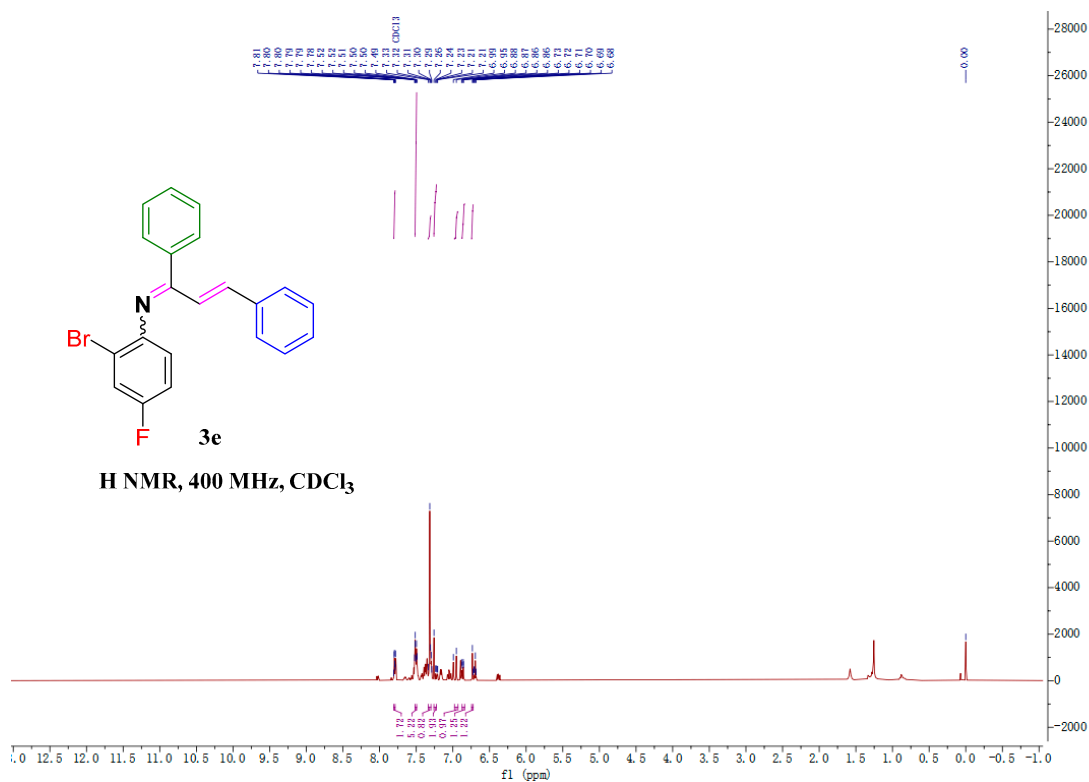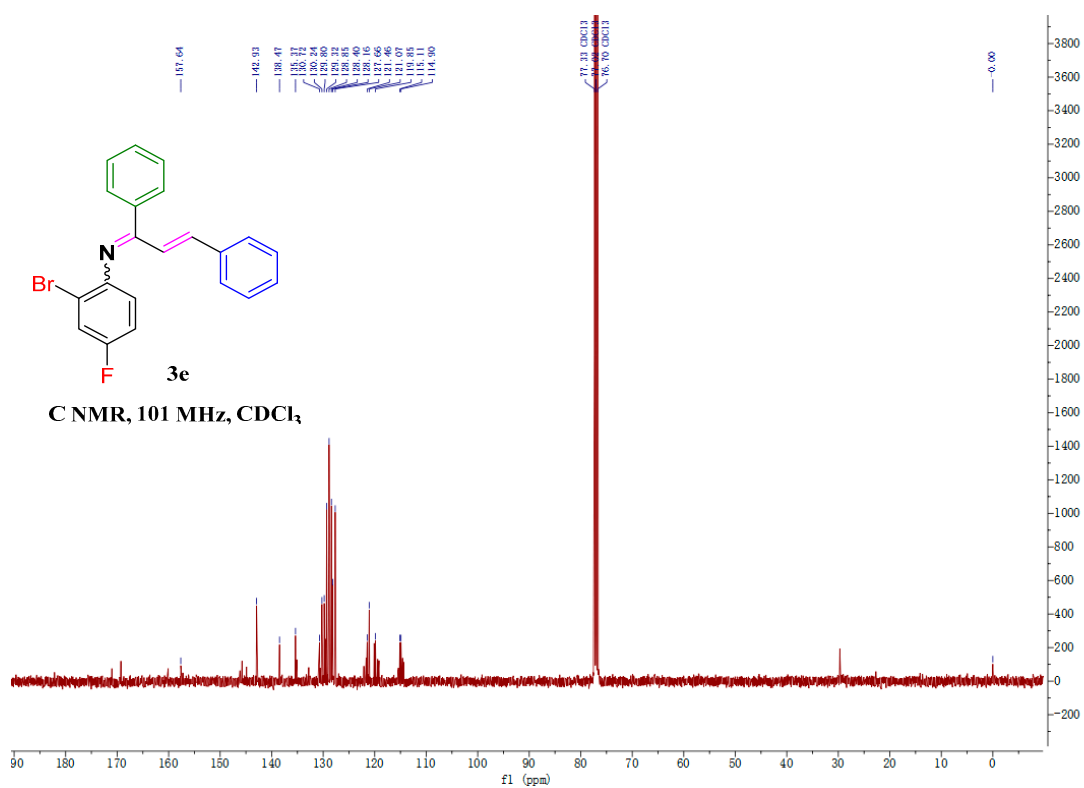



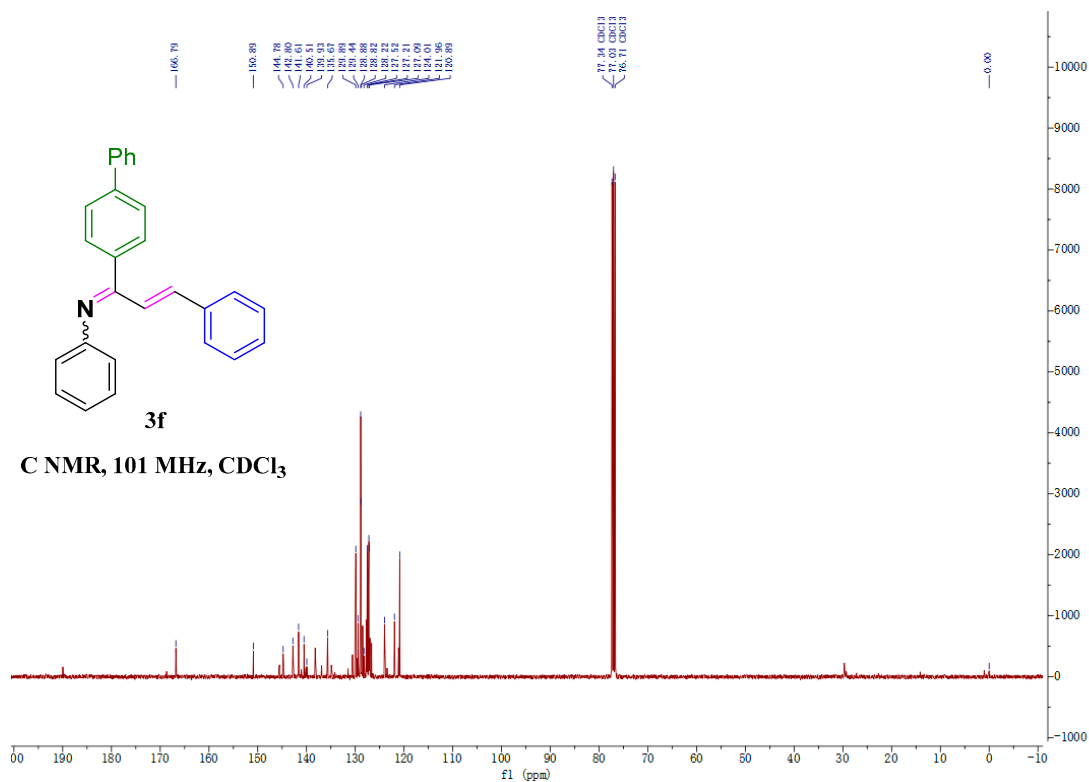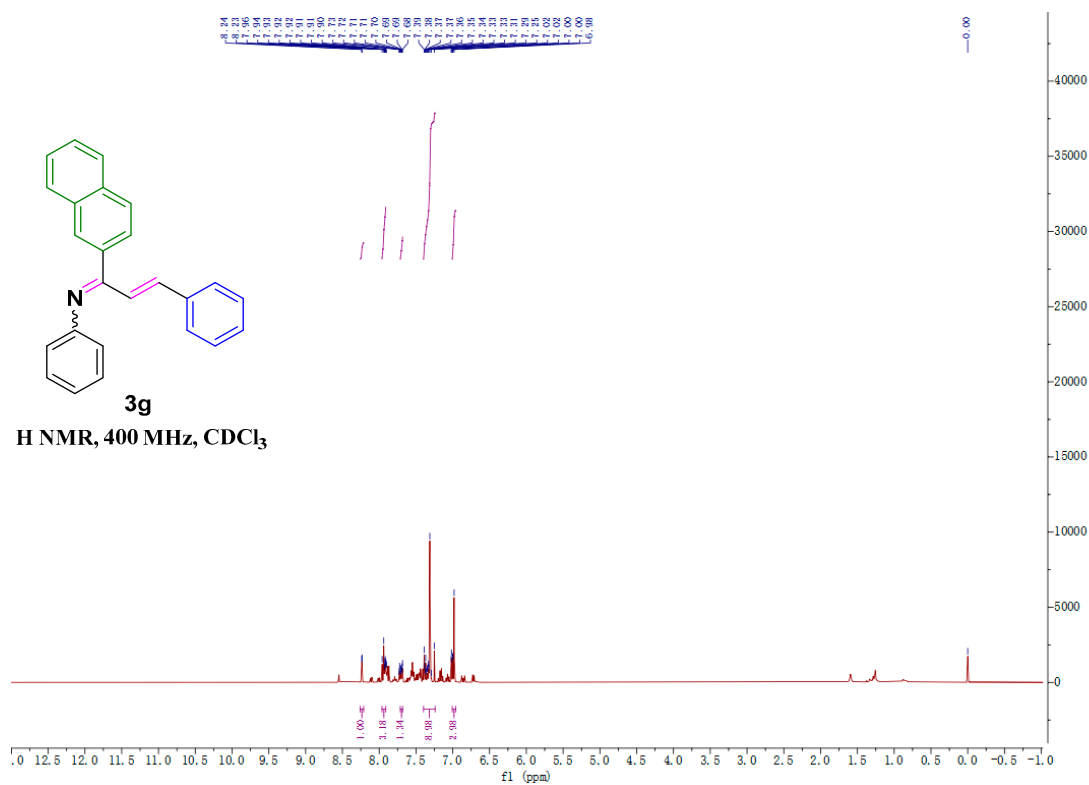

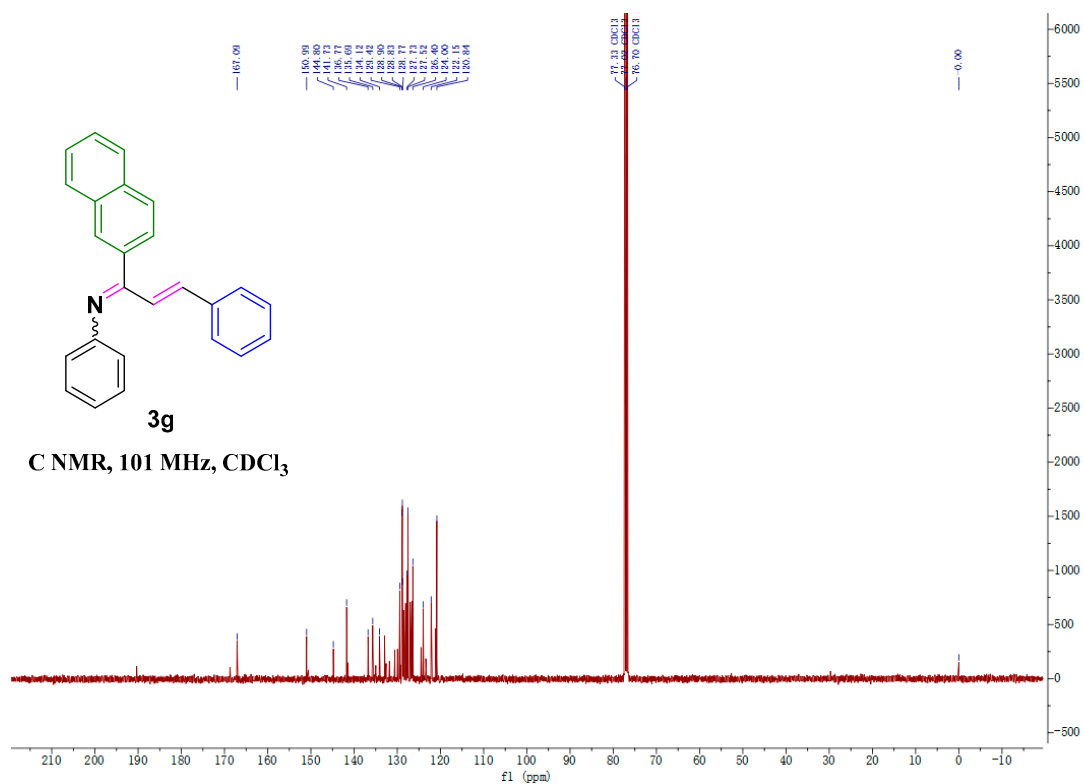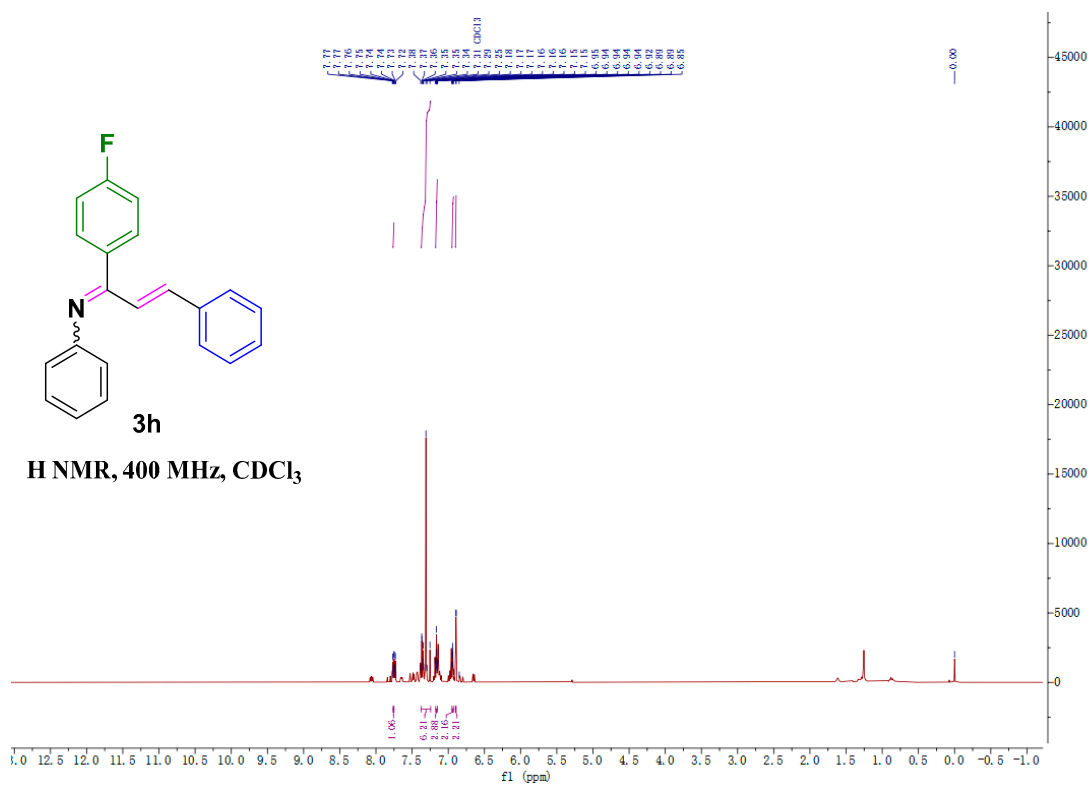



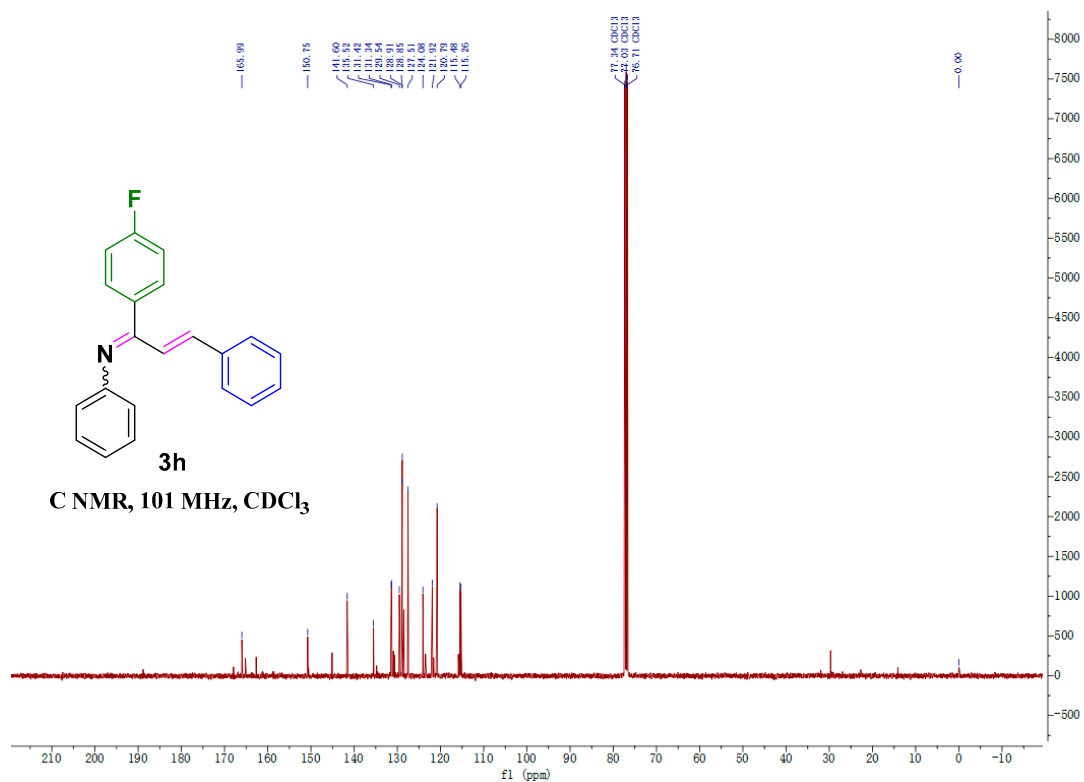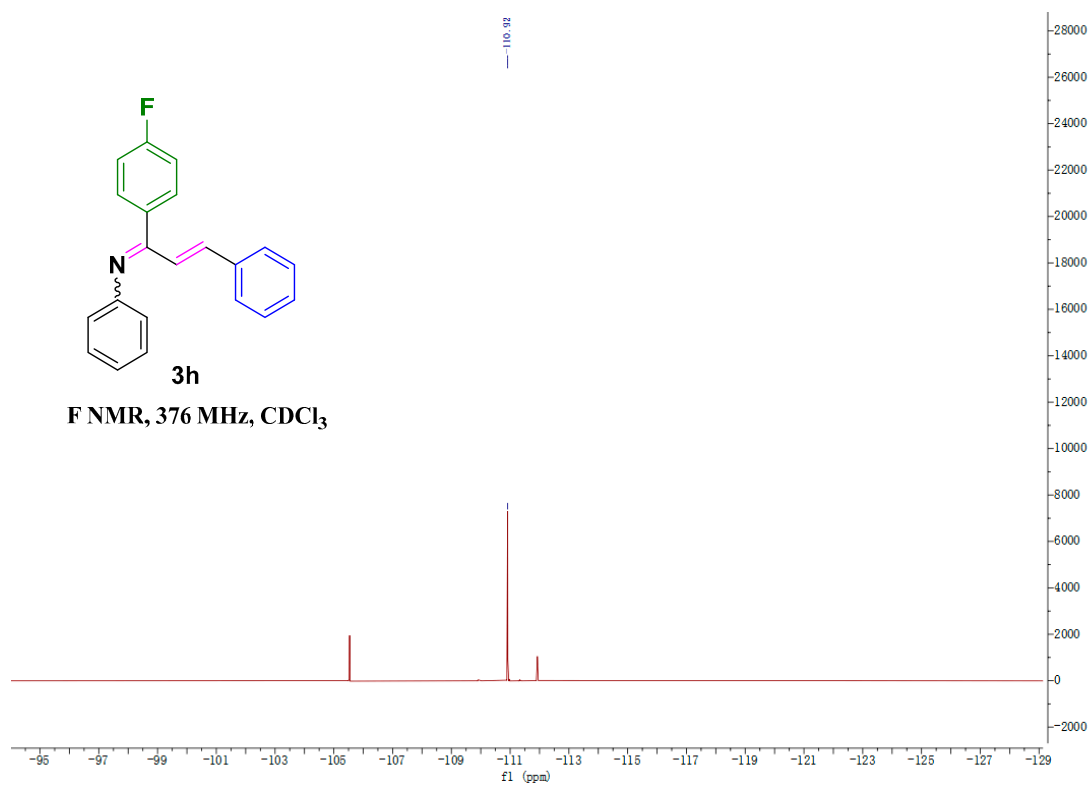



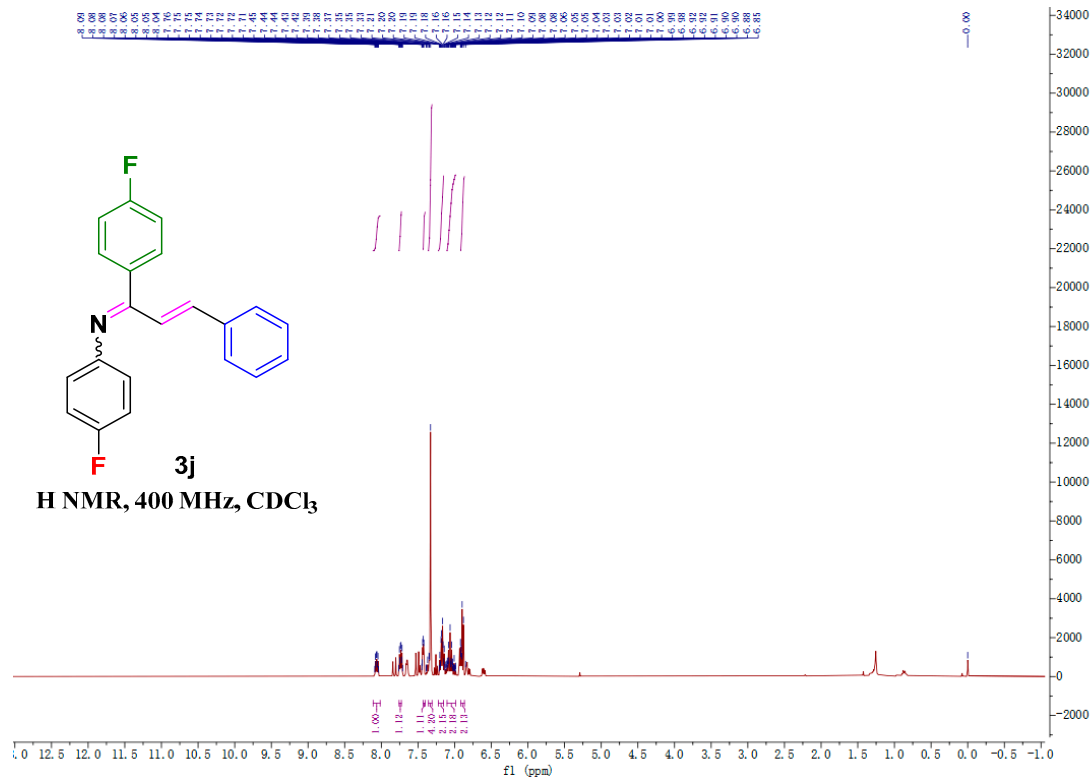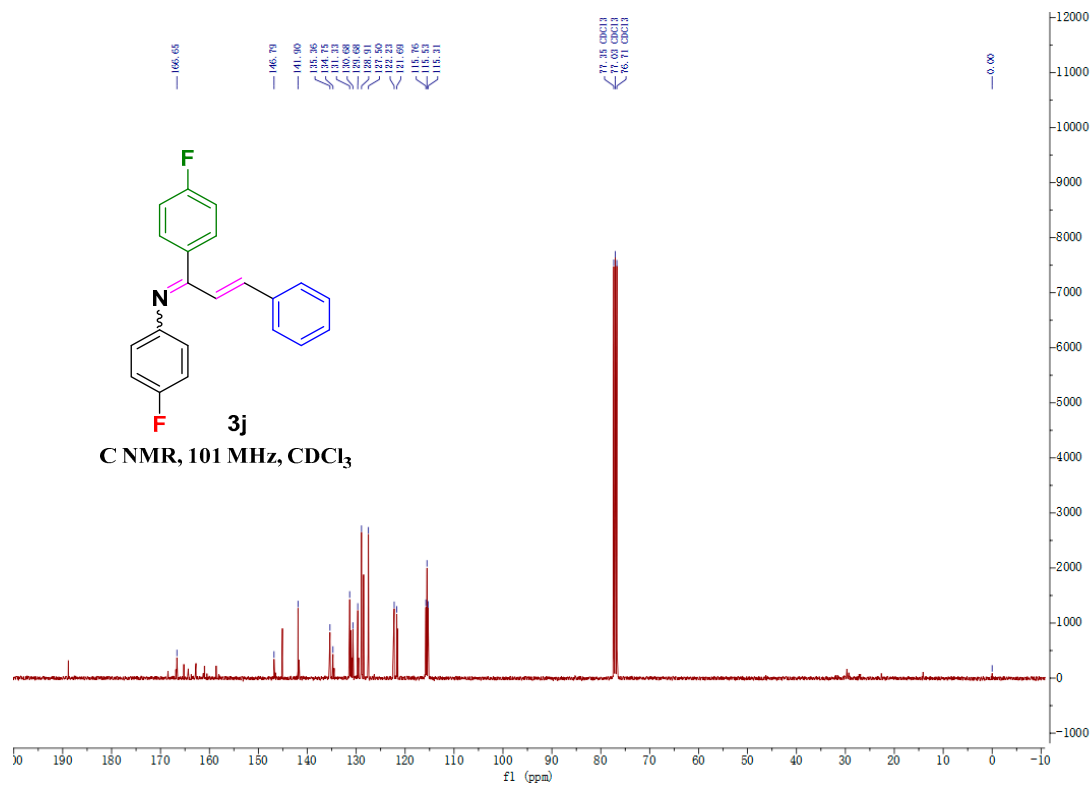

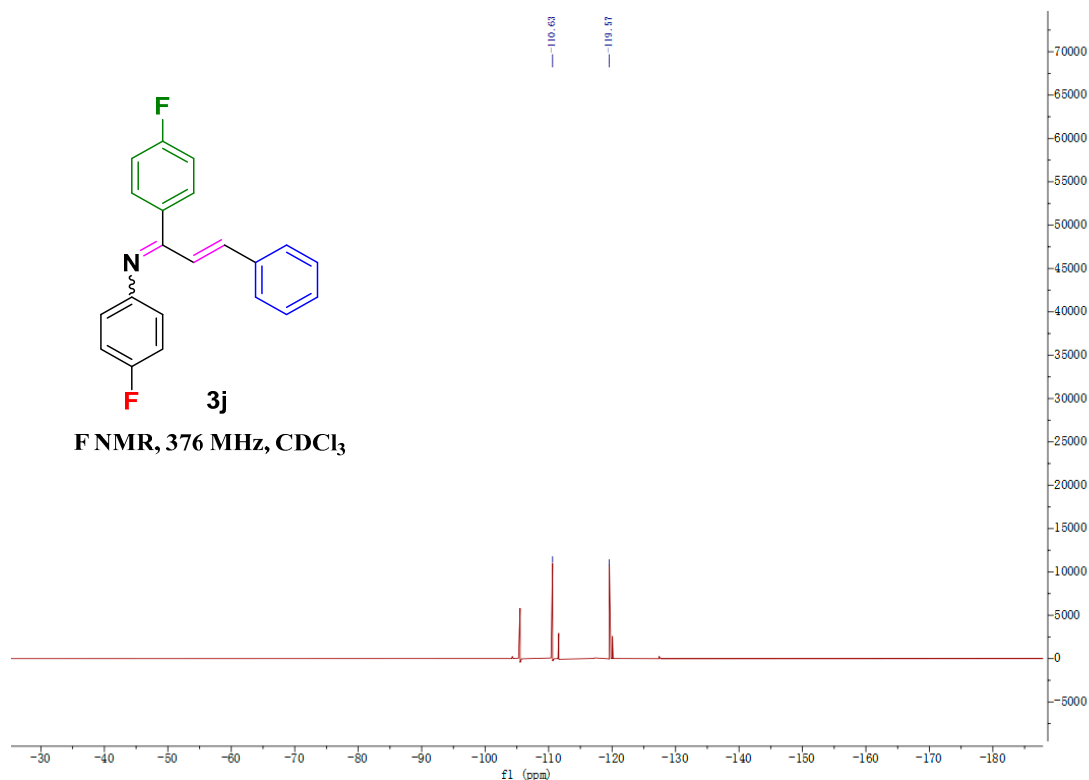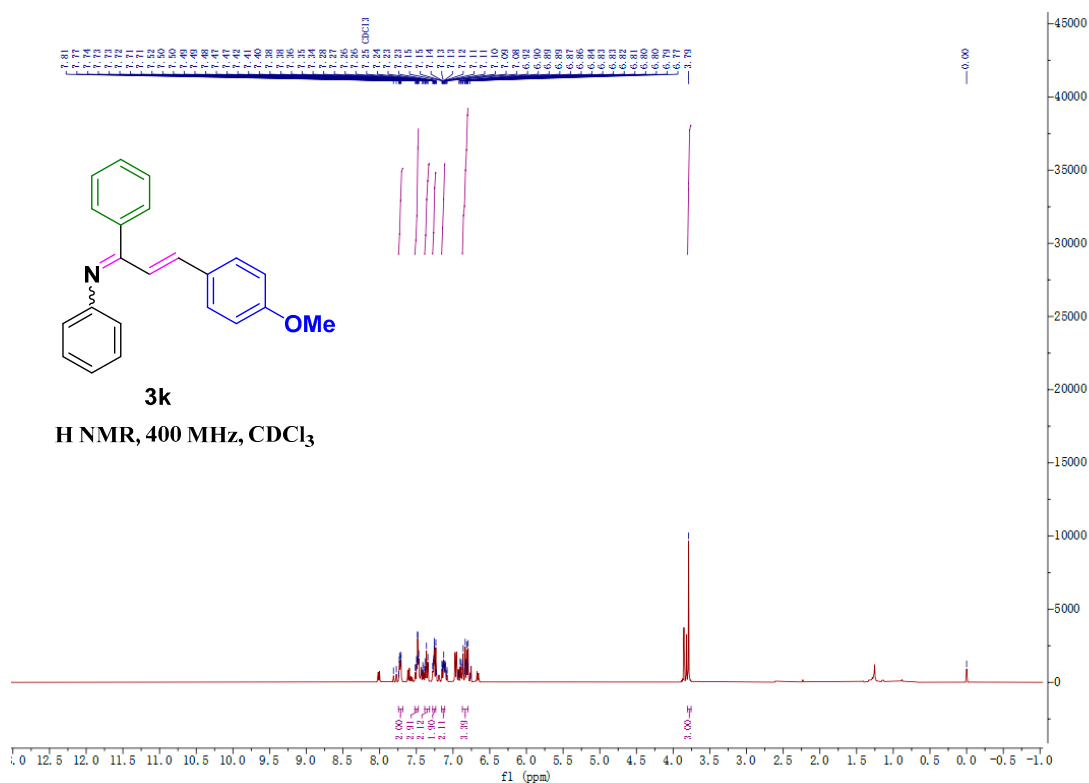

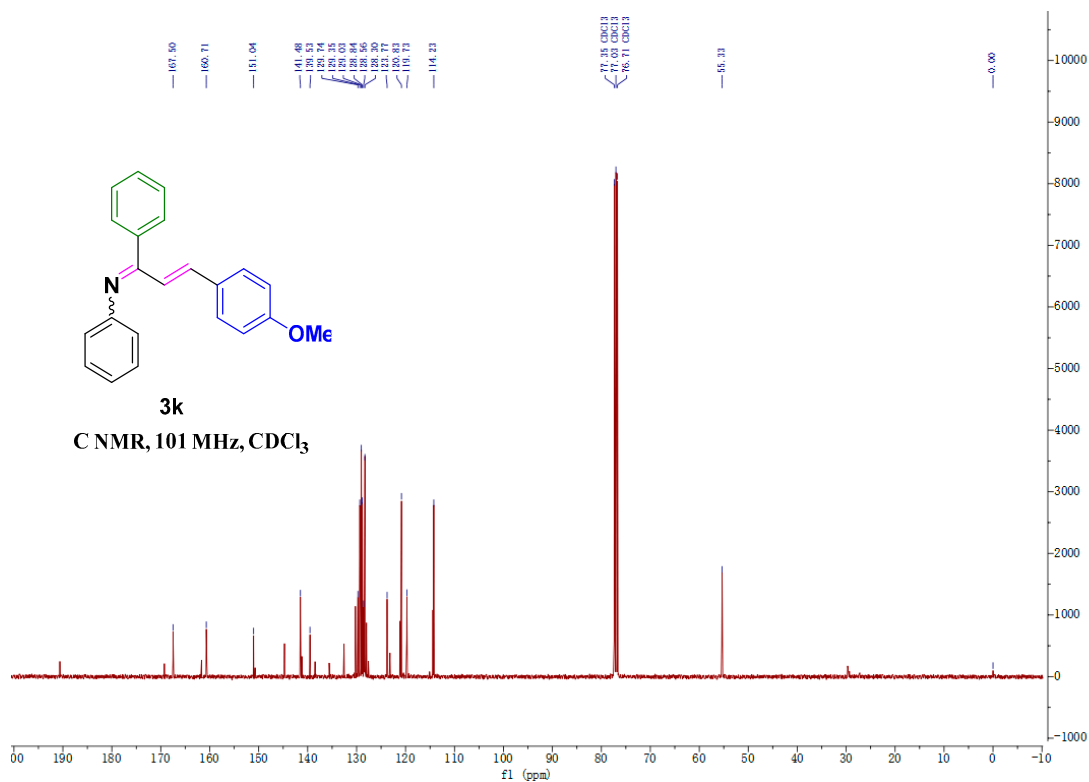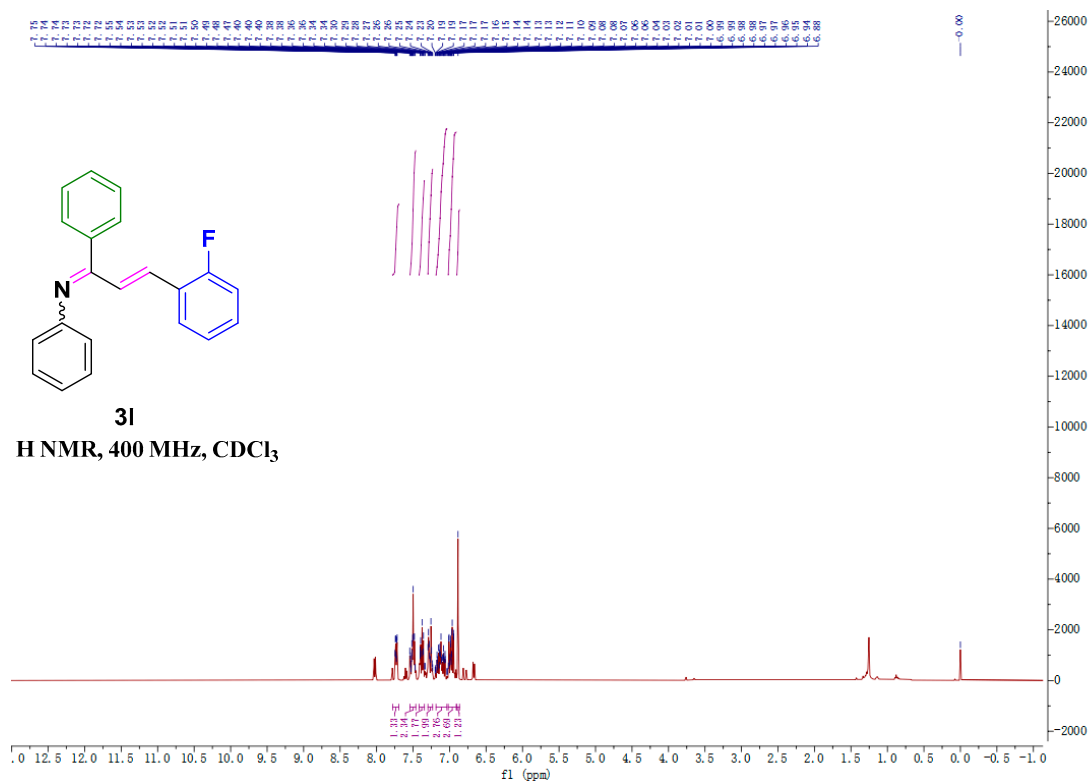

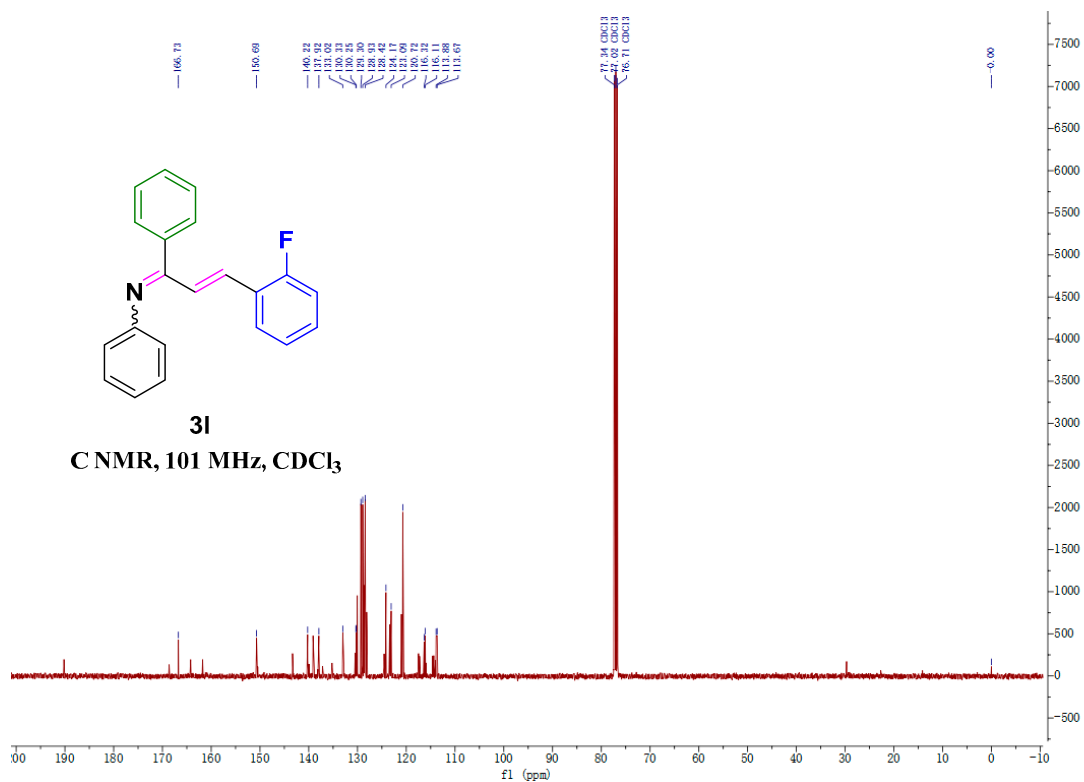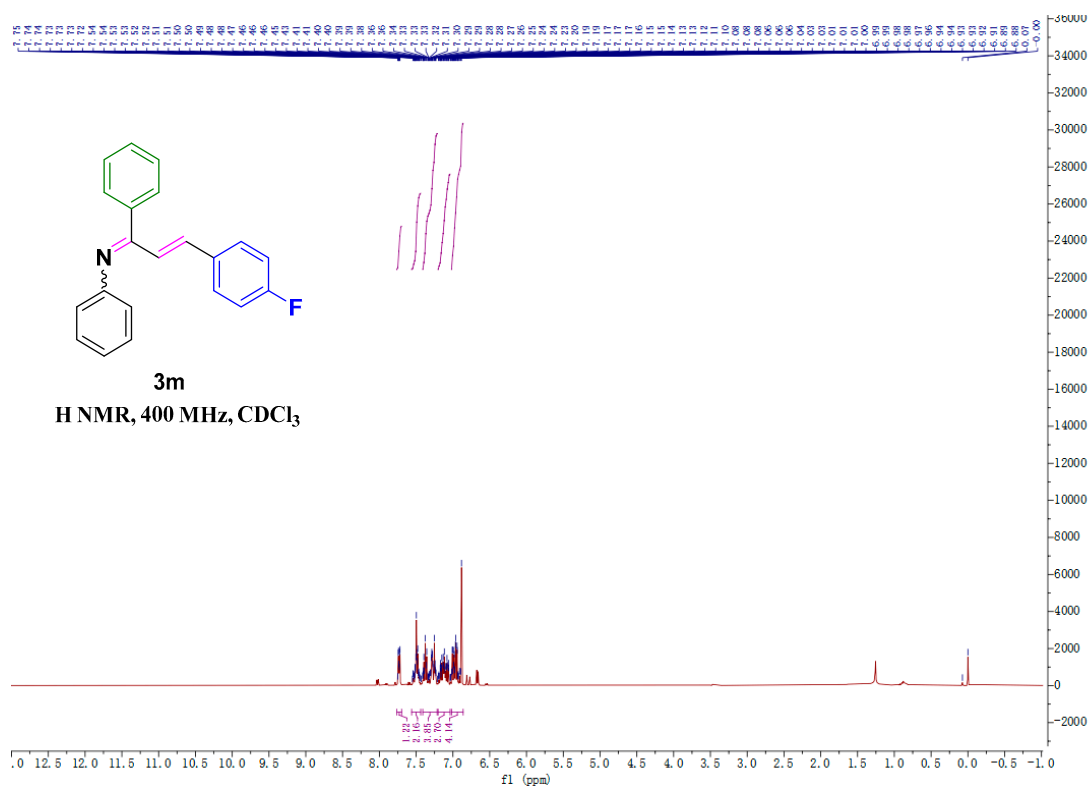

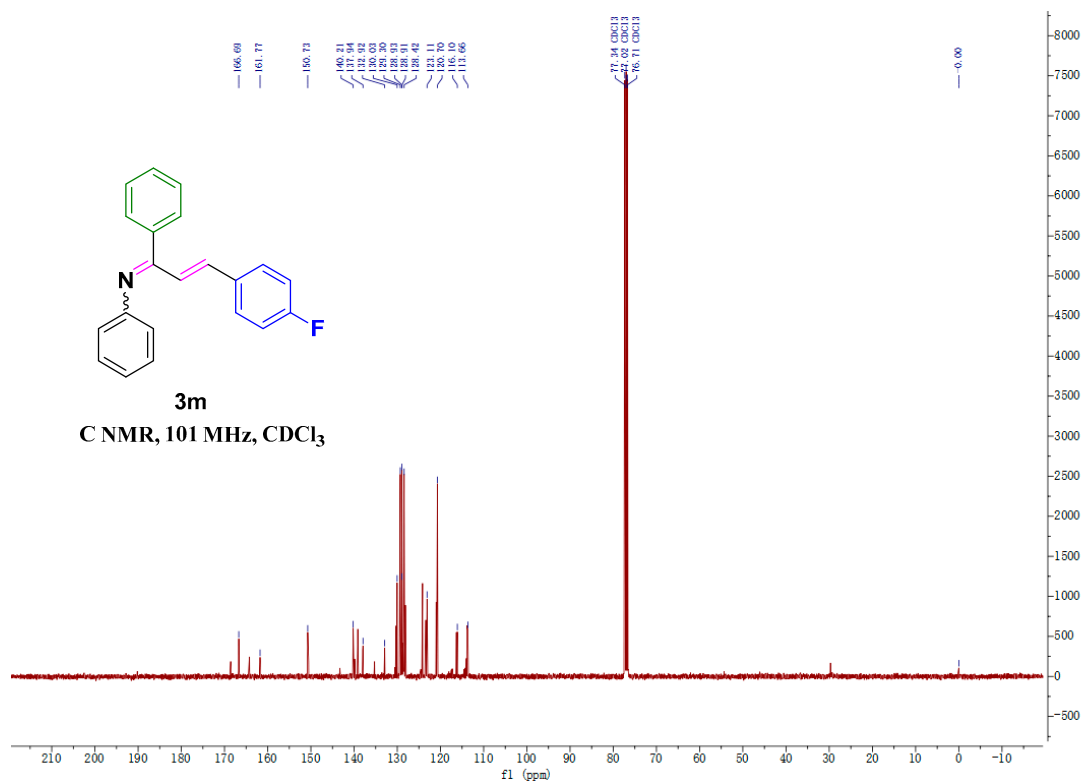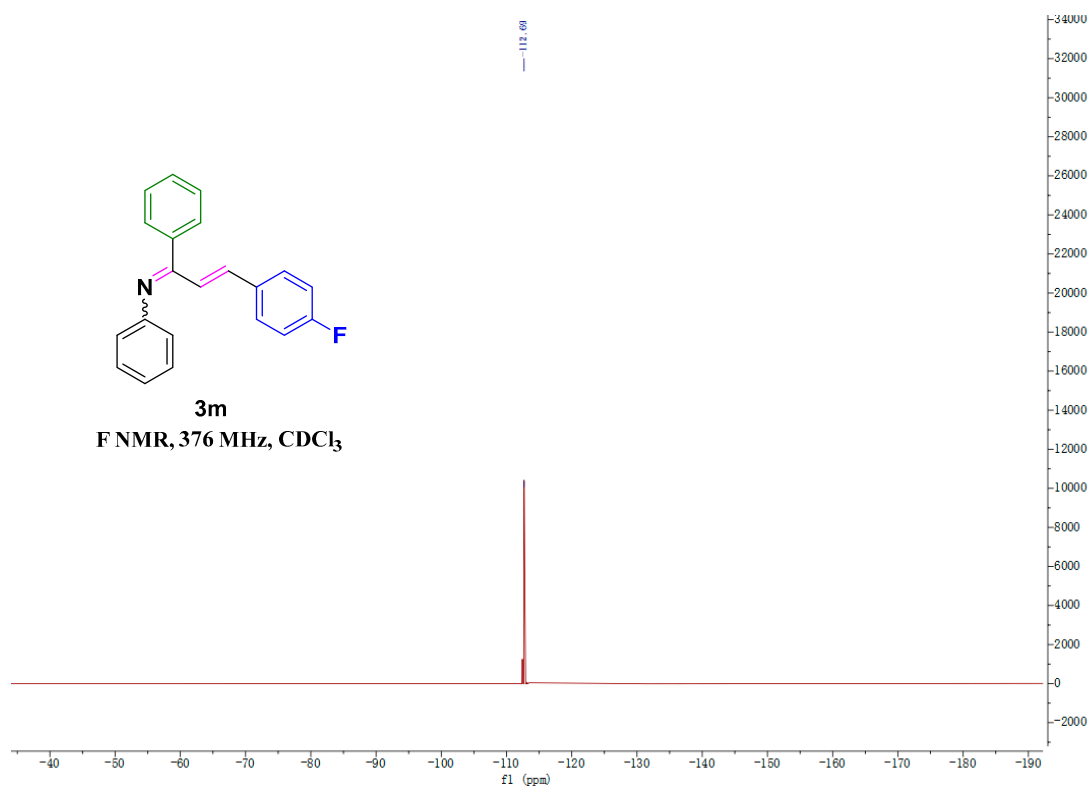

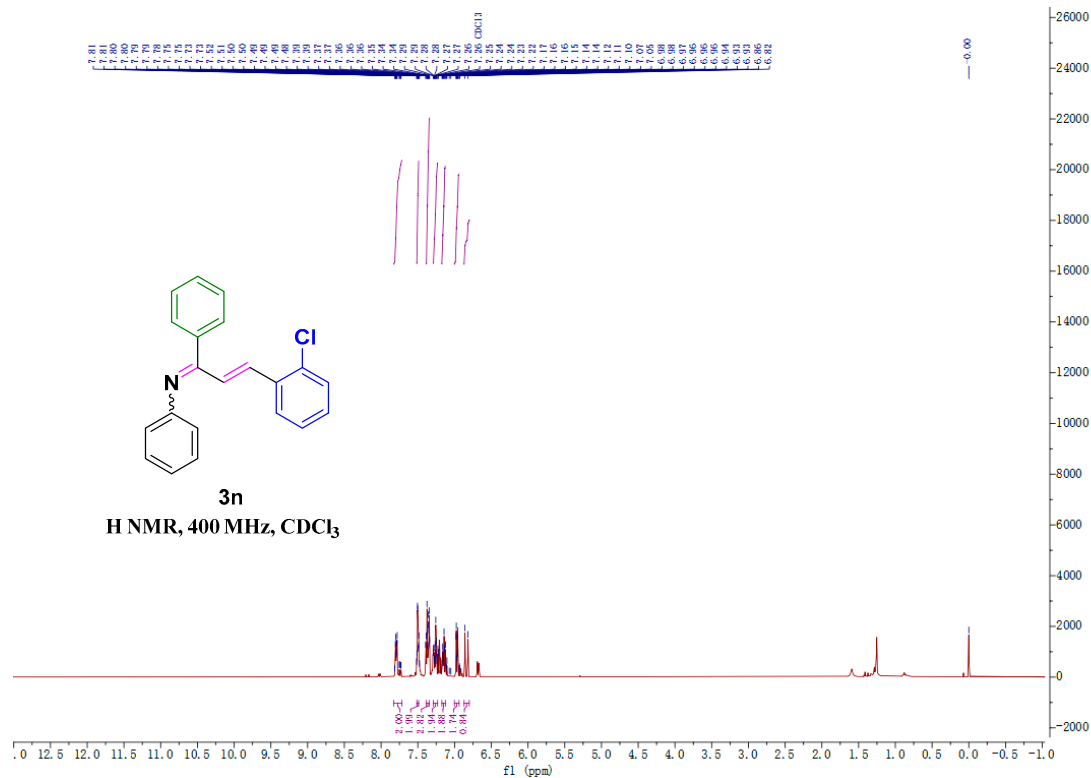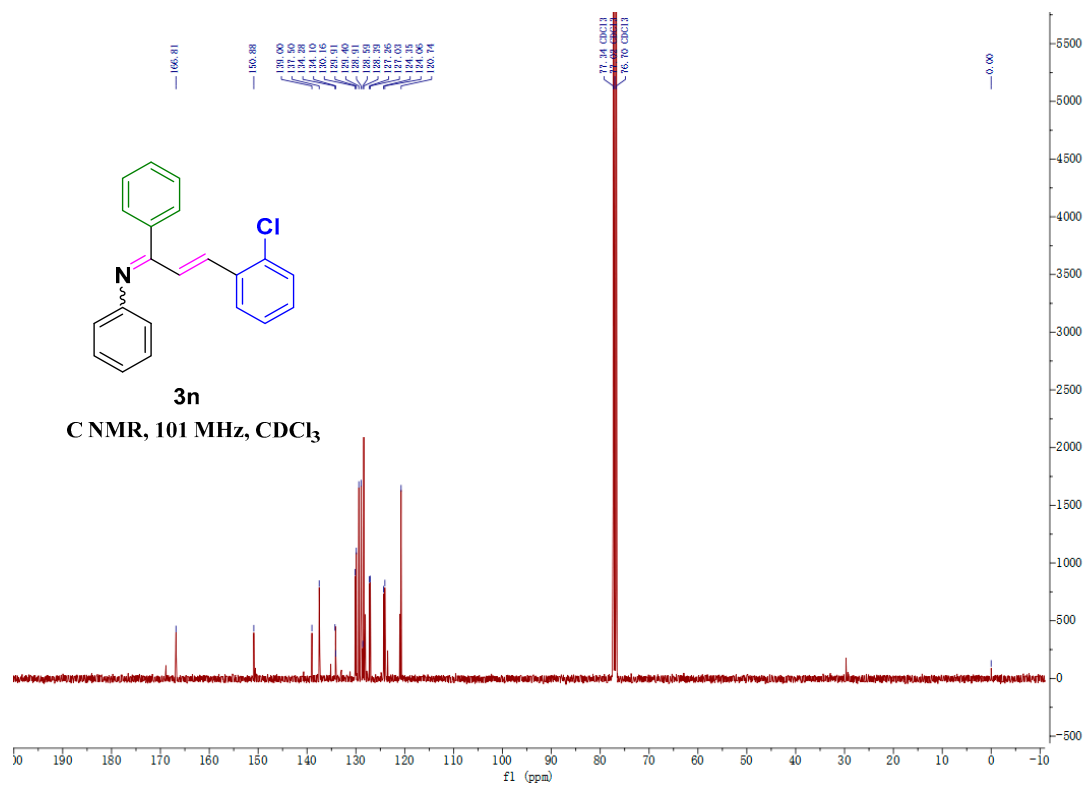



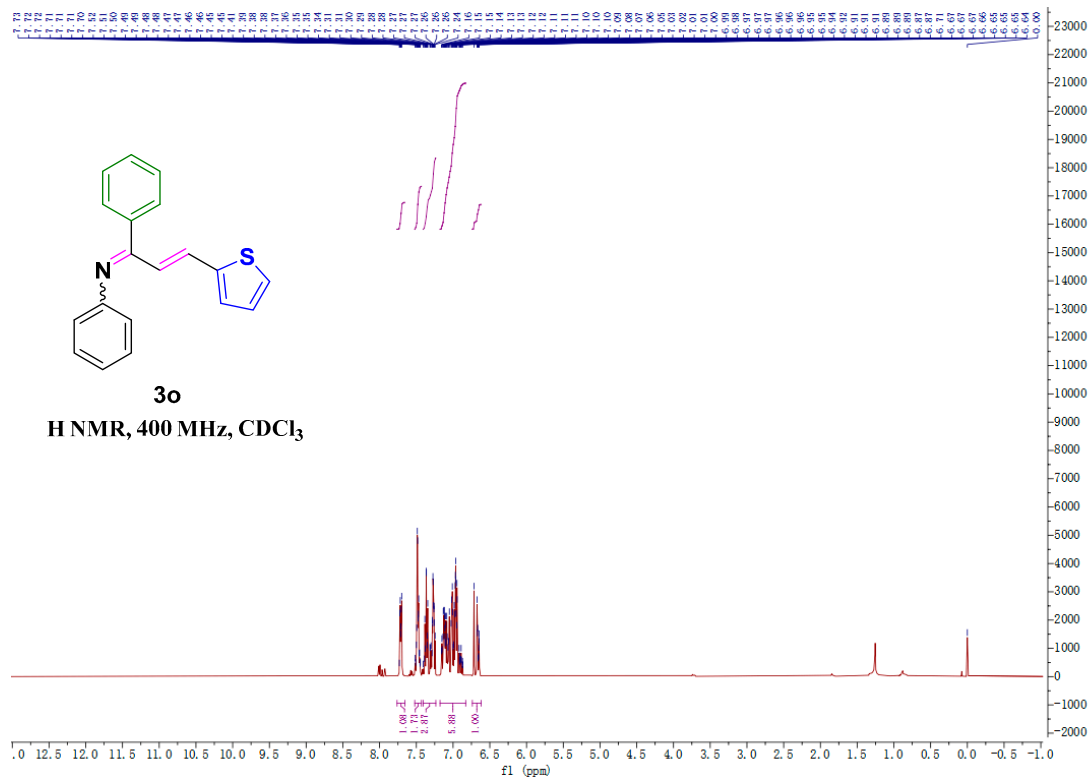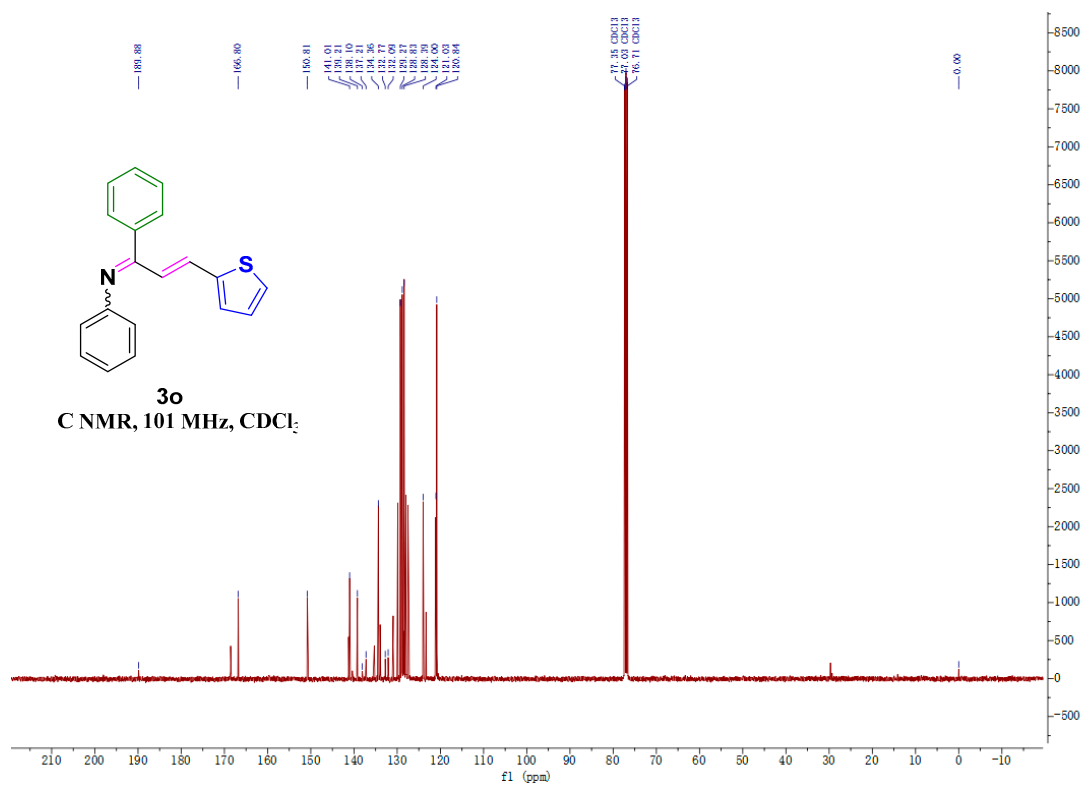

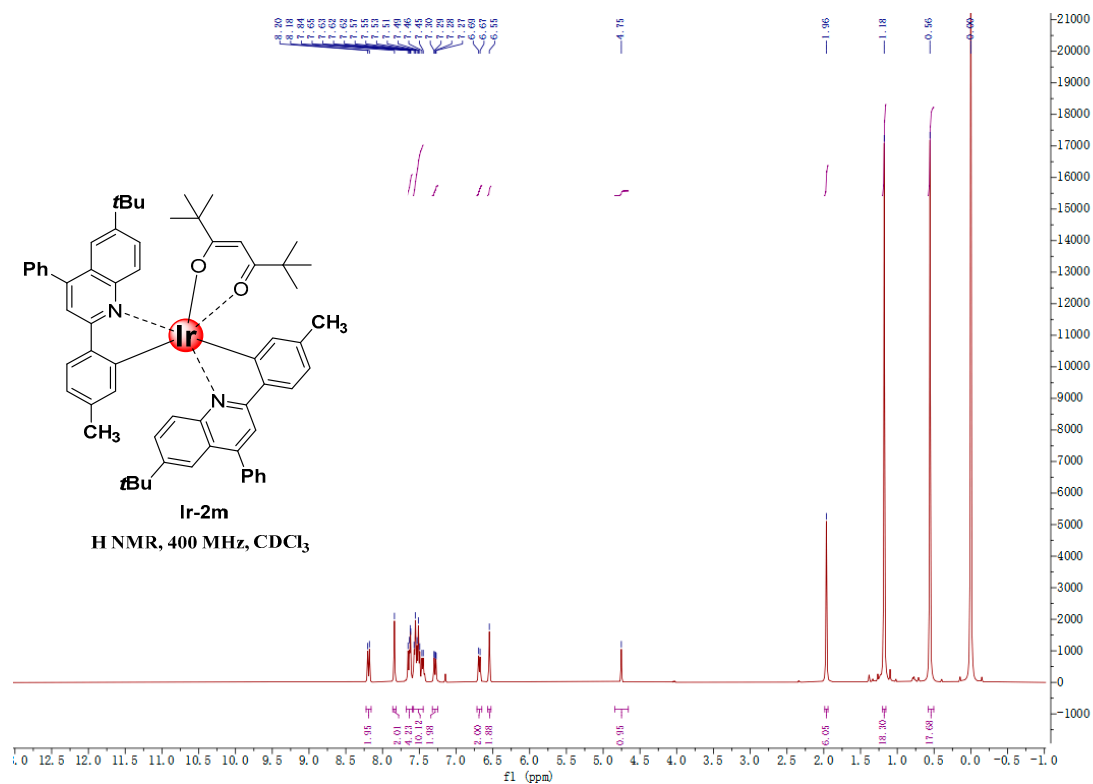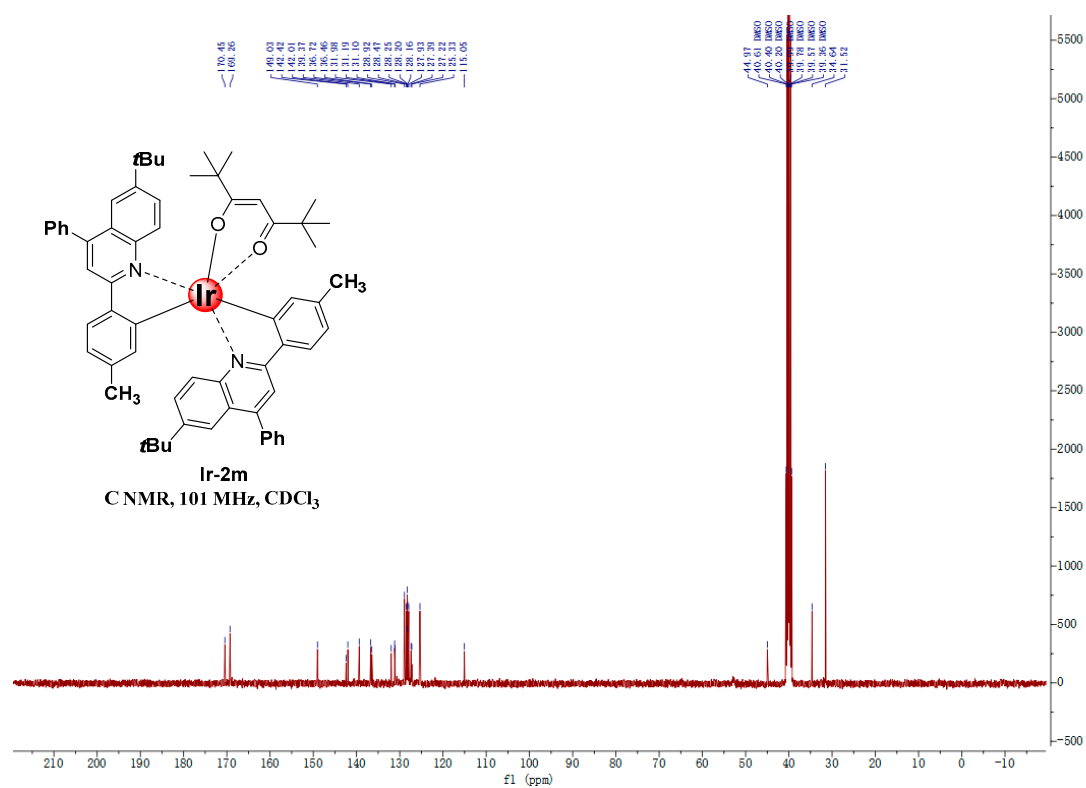

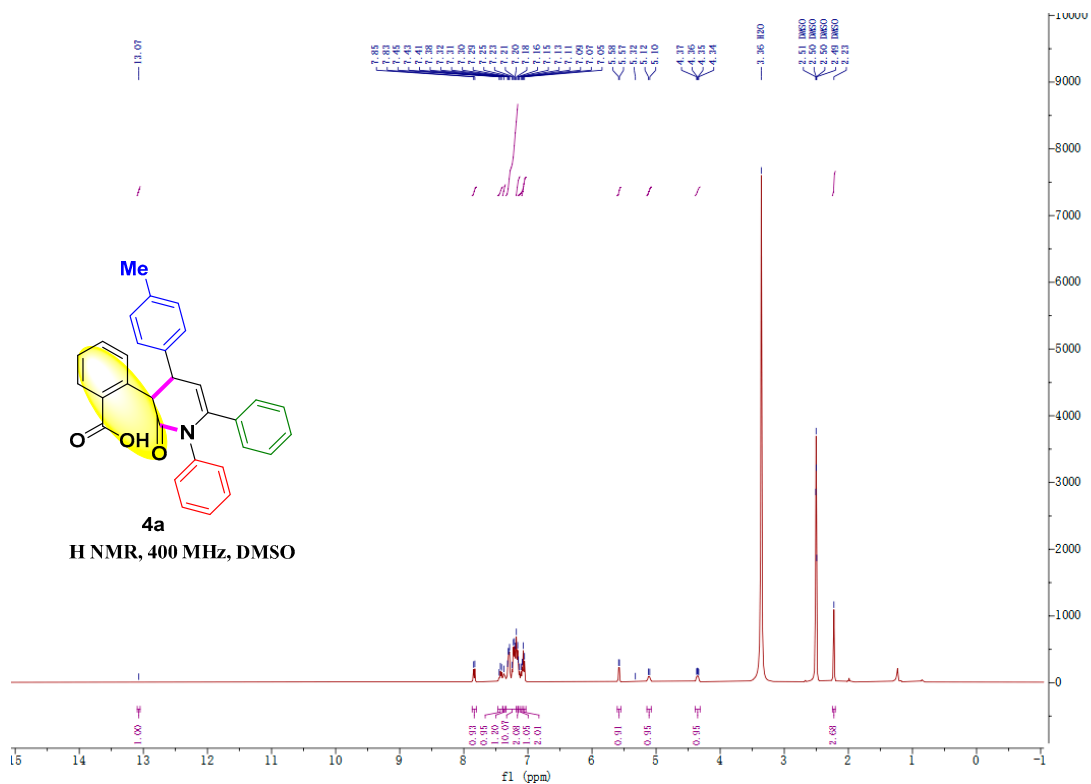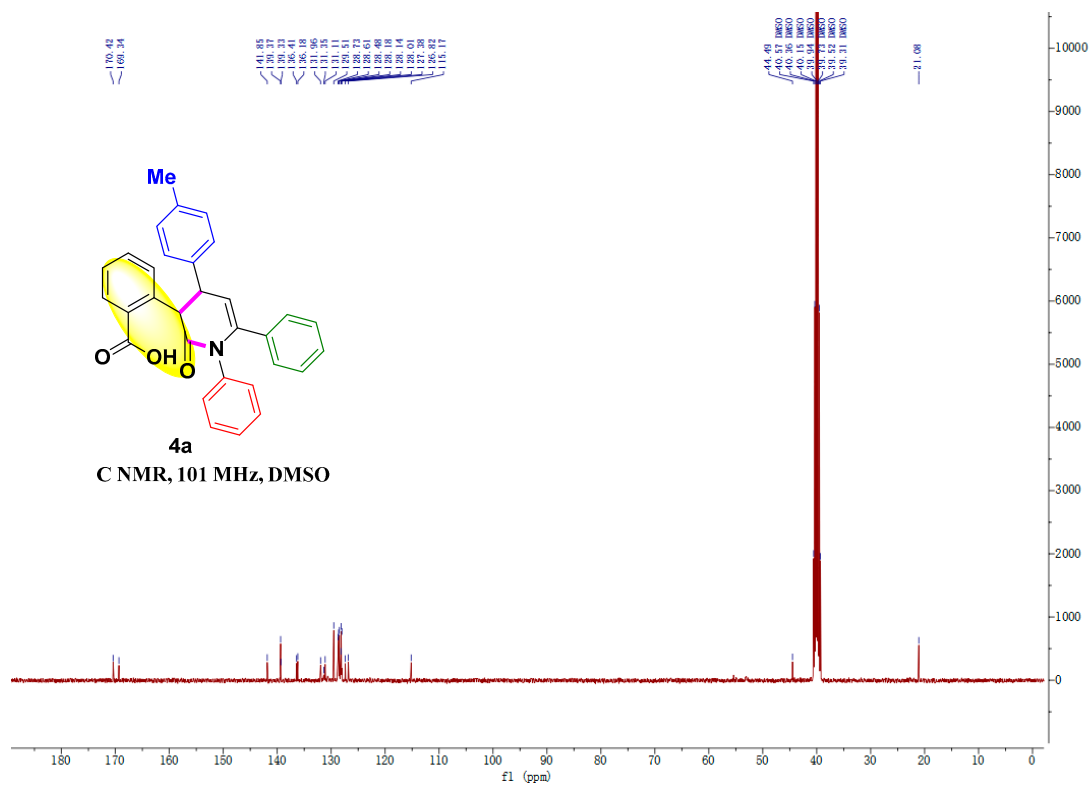

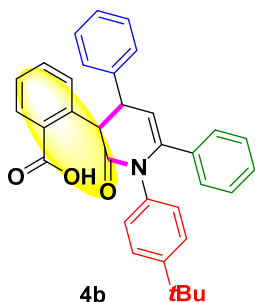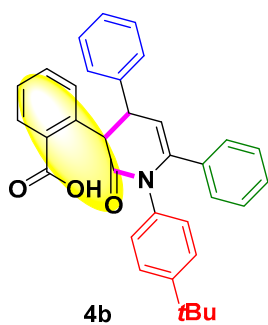

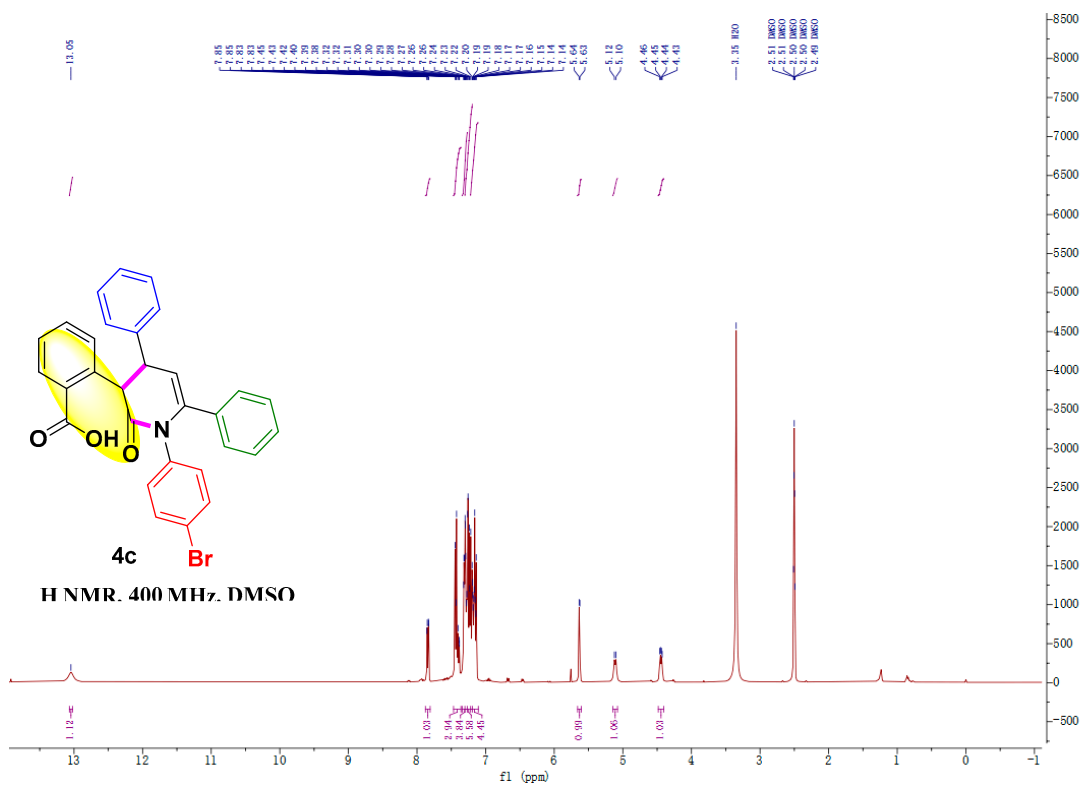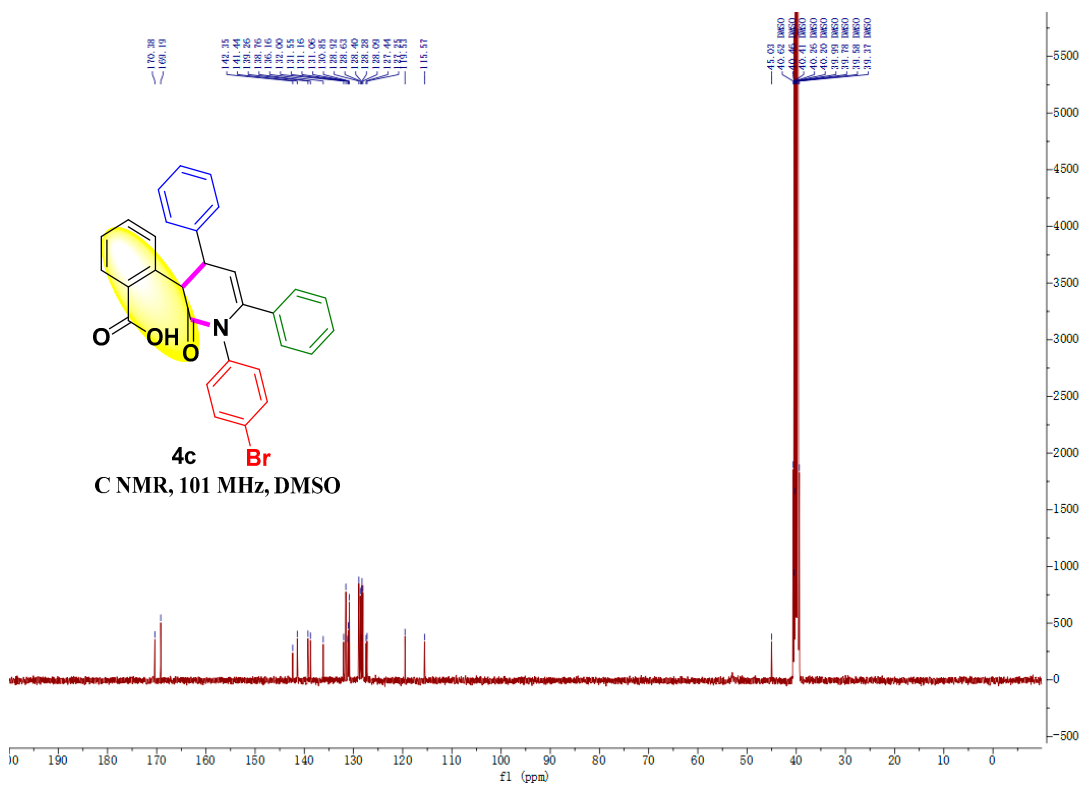

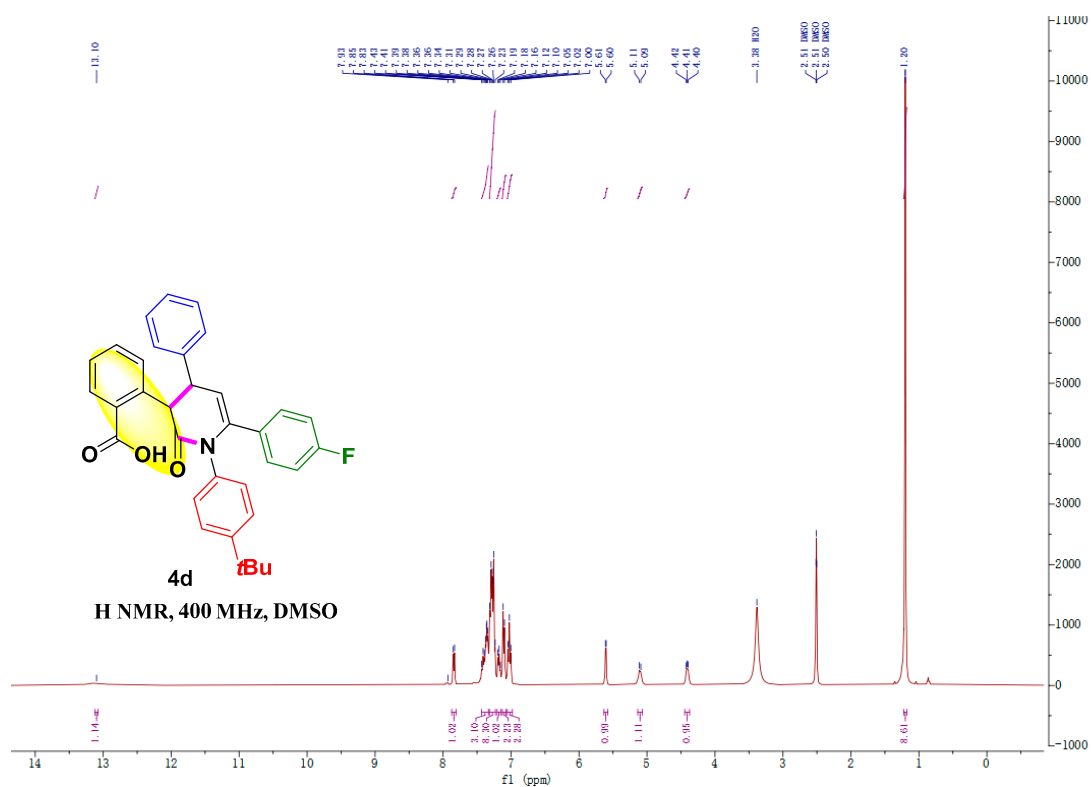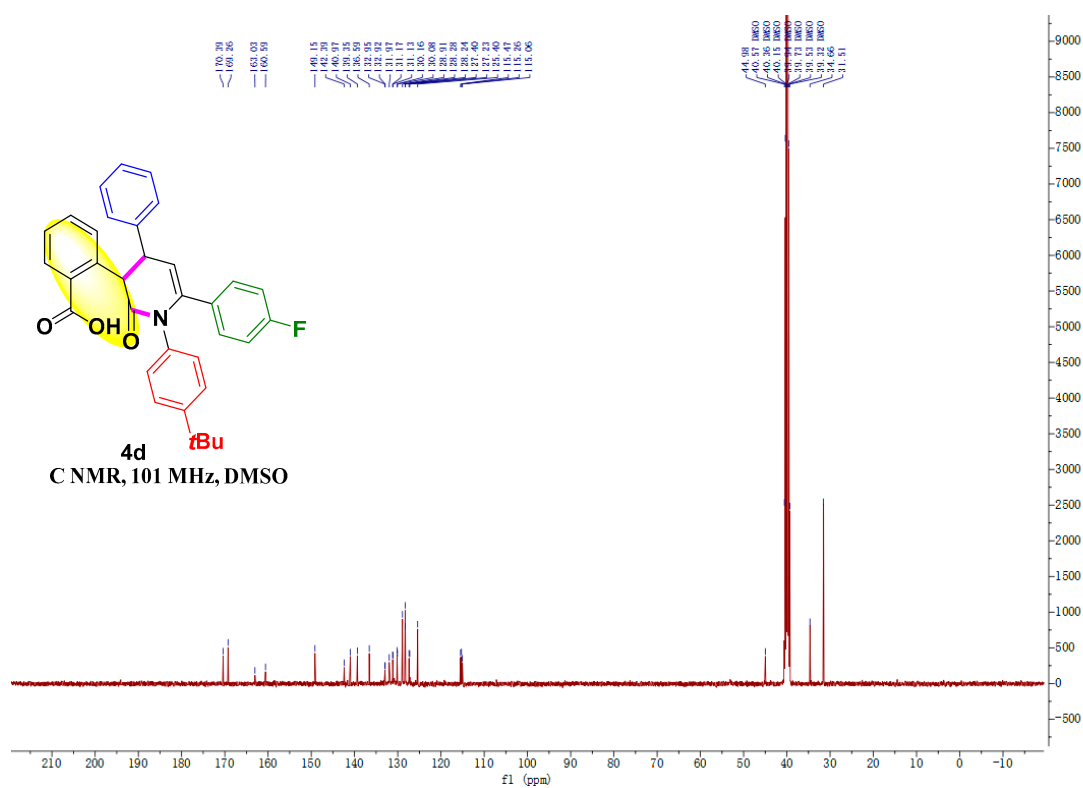

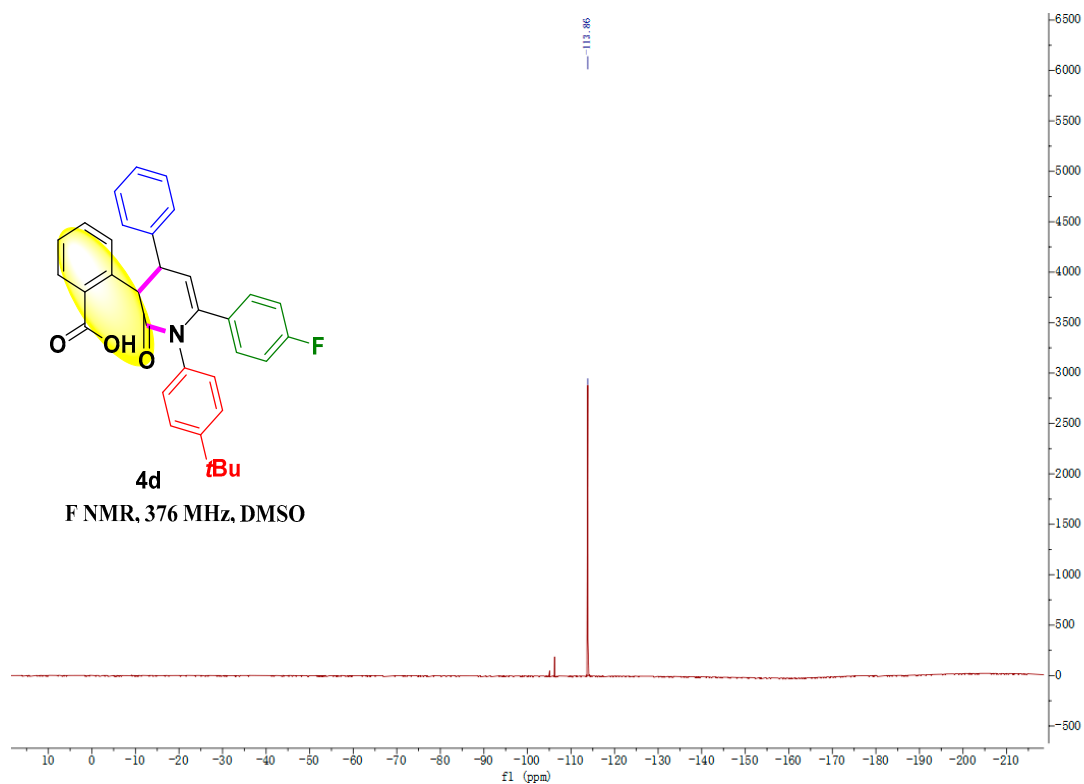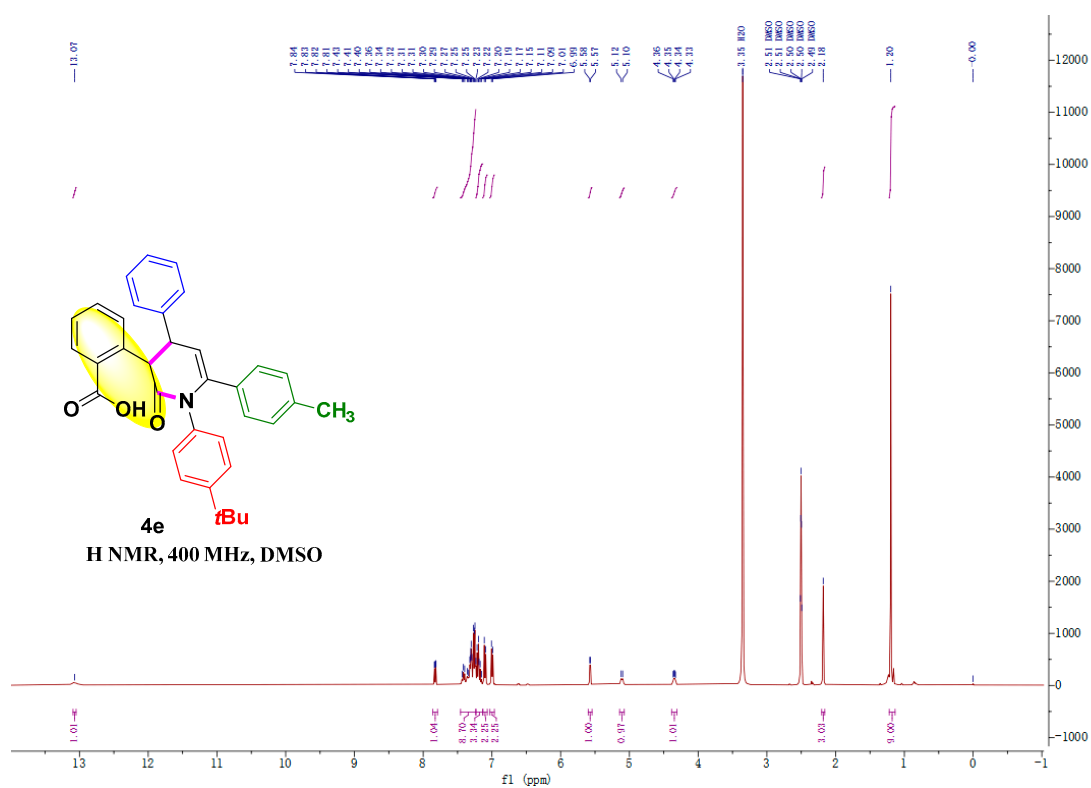

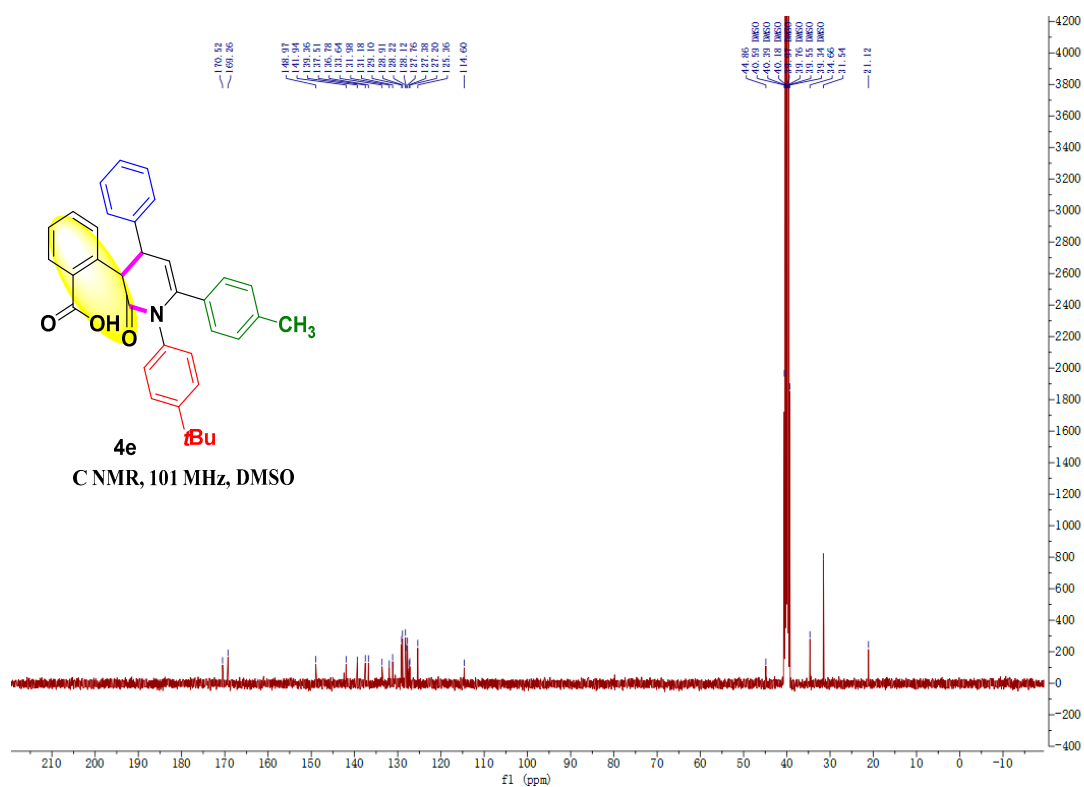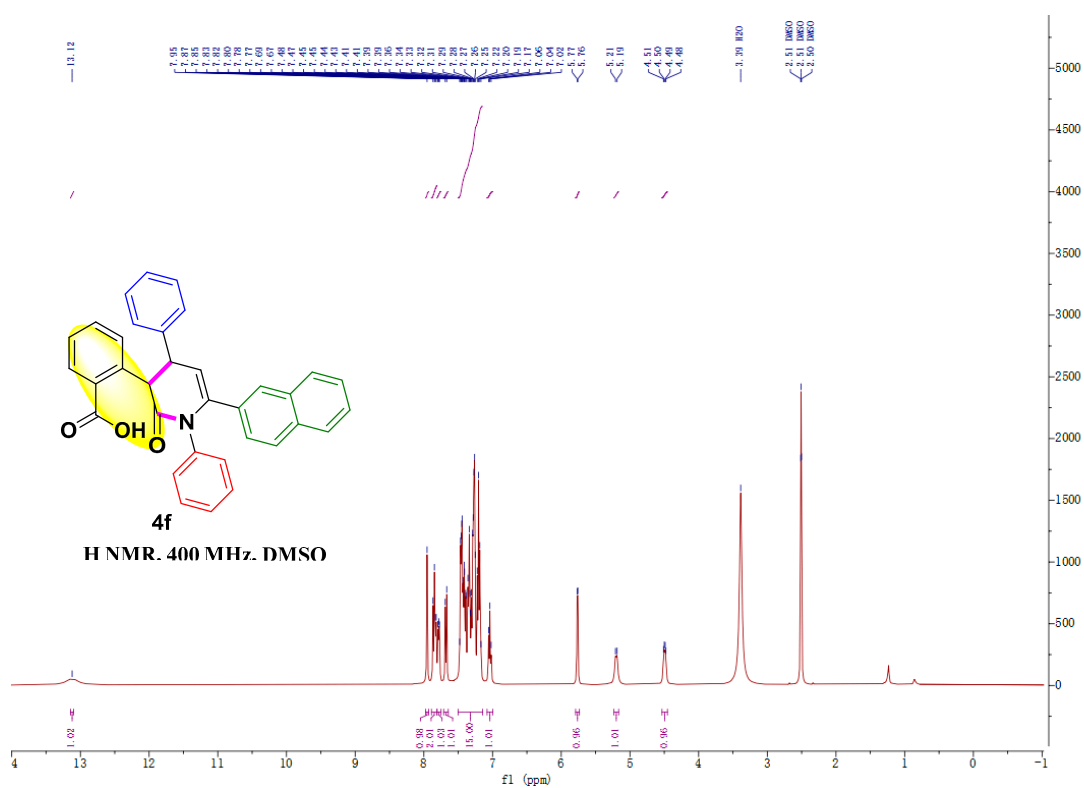



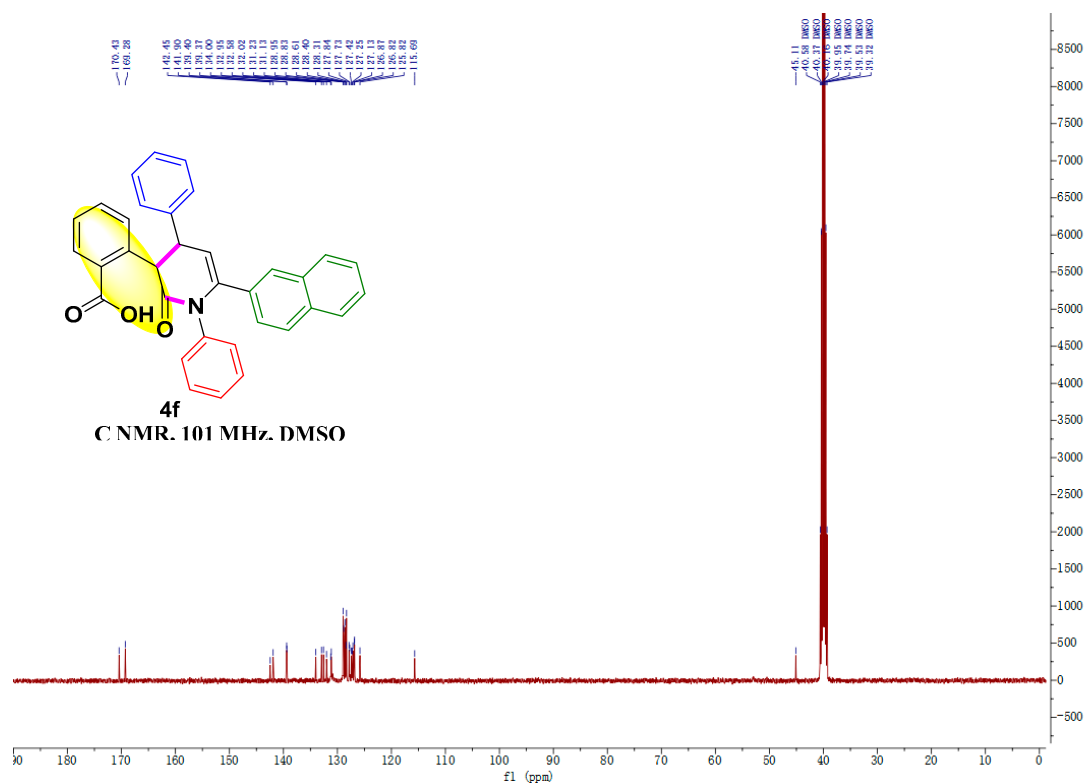

Supplement: s1 [file s1]
